# Supplementary material for: Validation of days at home as an outcome measure after surgery: a prospective cohort study in Australia
Source: PubMed Central journal article supplement — BMJ Open. 2017 Aug 18;7(8):e015828. doi: 10.1136/bmjopen-2017-015828 (PMC5629653; doi:10.1136/bmjopen-2017-015828), 2017-08-18
Supplement: bmjopen-2017-015828.draft_revisions.pdf [file bmjopen-2017-015828.draft_revisions.pdf]

# BMJ Open

## Days at Home as an Outcome Measure after Surgery

|                                 |                                                                                                                                                                                                                                                                                                                                                                                                                                                                                                                                                                 |
|---------------------------------|-----------------------------------------------------------------------------------------------------------------------------------------------------------------------------------------------------------------------------------------------------------------------------------------------------------------------------------------------------------------------------------------------------------------------------------------------------------------------------------------------------------------------------------------------------------------|
| Journal:                        | <i>BMJ Open</i>                                                                                                                                                                                                                                                                                                                                                                                                                                                                                                                                                 |
| Manuscript ID                   | bmjopen-2017-015828                                                                                                                                                                                                                                                                                                                                                                                                                                                                                                                                             |
| Article Type:                   | Research                                                                                                                                                                                                                                                                                                                                                                                                                                                                                                                                                        |
| Date Submitted by the Author:   | 03-Jan-2017                                                                                                                                                                                                                                                                                                                                                                                                                                                                                                                                                     |
| Complete List of Authors:       | Myles, Paul; Alfred Hospital and Monash University, Anaesthesia and Perioperative Medicine<br>Shulman, Mark; Alfred Hospital<br>Heritier, Stephane; School of Public Health and Preventive Medicine, Monash University, Department of Epidemiology and Preventive Medicine<br>Wallace, Sophie; Alfred Hospital<br>McIlroy, David; Alfred Hospital, Department of Anaesthesia and Perioperative Medicine<br>McCluskey, Stuart; University Health Network, Anesthesia and Pain Medicine<br>Sillar, Isabella; Alfred Hospital<br>Forbes, Andrew; Monash University |
| <b>Primary Subject Heading</b>: | Anaesthesia                                                                                                                                                                                                                                                                                                                                                                                                                                                                                                                                                     |
| Secondary Subject Heading:      | Surgery, Epidemiology                                                                                                                                                                                                                                                                                                                                                                                                                                                                                                                                           |
| Keywords:                       | STATISTICS & RESEARCH METHODS, outcome, perioperative medicine, Clinical trials < THERAPEUTICS                                                                                                                                                                                                                                                                                                                                                                                                                                                                  |
|                                 |                                                                                                                                                                                                                                                                                                                                                                                                                                                                                                                                                                 |

SCHOLARONE™  
Manuscripts

## Days at Home as an Outcome Measure after Surgery

Paul S. Myles,<sup>1,2,3</sup> Mark A. Shulman,<sup>1</sup> Stephane Heritier,<sup>3</sup> Sophie Wallace,<sup>1</sup> David R. McIlroy,<sup>1,2</sup> Stuart McCluskey,<sup>4</sup> Isabella Sillar,<sup>2</sup> Andrew Forbes<sup>3</sup>

---

<sup>1</sup>Department of Anaesthesia and Perioperative Medicine, Alfred Hospital, Melbourne, Australia

<sup>2</sup>Department of Anaesthesia and Perioperative Medicine, Monash University, Melbourne, Australia

<sup>3</sup>Department of Epidemiology and Preventive Medicine, Monash University, Melbourne, Australia

<sup>4</sup>Toronto General Hospital and University of Toronto, Toronto, ON, Canada

### **ADDRESS FOR CORRESPONDENCE**

Paul S. Myles  
Professor and Chair  
Department of Anaesthesia and Perioperative Medicine  
Alfred Hospital, Commercial Road, Melbourne, Victoria, 3004, Australia

Email: p.myles@alfred.org.au

**Word count:** 2745

*The Corresponding Author has the right to grant on behalf of all authors and does grant on behalf of all authors, a worldwide licence to the Publishers and its licensees in perpetuity, in all forms, formats and media (whether known now or created in the future), to i) publish, reproduce, distribute, display and store the Contribution, ii) translate the Contribution into other languages, create adaptations, reprints, include within collections and create summaries, extracts and/or, abstracts of the Contribution, iii) create any other derivative work(s) based on the Contribution, iv) to exploit all subsidiary rights in the Contribution, v) the inclusion of electronic links from the Contribution to third party material where-ever it may be located; and, vi) licence any third party to do any or all of the above.*

Competing interest statement - All authors declare that the answer to the questions on the competing interest form are all No and therefore have nothing to declare.

Funding - The Australian and New Zealand College of Anaesthetists; and the Australian National Health and Medical Research Council Practitioner Fellowship (Prof Myles).

## ABSTRACT

**OBJECTIVE** To evaluate “days at home up to 30 days after surgery” (DAH<sub>30</sub>) as a patient-centred outcome measure.

**DESIGN** Prospective cohort study.

**DATA SOURCE** Using clinical trial data (7 trials, 2109 patients) we calculated DAH<sub>30</sub> from length of stay, re-admission, discharge destination, and death up to 30 days after surgery.

**MAIN OUTCOME** The association between DAH<sub>30</sub> and serious complications after surgery.

**RESULTS** One or more complications occurred in 263 of 1846 (14.2%) patients, including 19 (1.0%) deaths within 30 days of surgery; 245 (11.6%) patients were discharged to a rehabilitation facility and 150 (7.1%) were readmitted to hospital within 30 days of surgery. The median DAH<sub>30</sub> was significantly less in older patients ( $P < 0.001$ ), those with poorer physical functioning ( $P < 0.001$ ), and in those undergoing longer operations ( $P < 0.001$ ). Patients with serious complications had less days at home than patients without serious complications (20.5 [95% CI, 19.1 to 21.9] vs 23.9 [95% CI, 23.8 to 23.9]  $P < 0.001$ ), and had higher rates of readmission (16.0% vs. 5.9%;  $P < 0.001$ ). After adjusting for patient age, sex, physical status and duration of surgery, the occurrence of postoperative complications was associated with fewer days at home after surgery (difference 3.0 [95% CI, 2.1 to 4.0] days;  $P < 0.001$ ).

**CONCLUSIONS** DAH<sub>30</sub> is a valid and readily-obtainable generic patient-centred outcome measure. It is an ideal outcome measure for perioperative clinical trials.

### Strengths and limitations of the study

- This study integrates length of stay, re-admission, discharge destination, and early deaths after surgery into a single outcome metric, “days at home up to 30 days after surgery” (DAH<sub>30</sub>)
- DAH<sub>30</sub>, as numerical data, provides greater statistical power and so can reduce the sample size required to evaluate new treatments
- DAH<sub>30</sub> is an ideal, patient-centred outcome measure for perioperative clinical trials and quality assurance activities
- DAH<sub>30</sub> can also be used to evaluate the outcome of hospital treatment for medical conditions (e.g. exacerbation of heart failure or chronic obstructive pulmonary disease)

## Introduction

Surgery and other interventional procedures are intended to relieve symptoms and in many cases prolong life. But surgery is not risk-free; perioperative complications can impair patient recovery resulting in prolonged hospitalization, short or longer term disability, and sometimes poor survival. A wide variety of outcome measures have been used to quantify each of these aspects of the postoperative experience but few provide a broad, patient-centred perspective of effective and efficient care;<sup>1</sup> these are needed to better inform the current shift towards value-based healthcare.<sup>2,3</sup>

Patient-centred care requires clinicians to consider outcomes that matter most to patients. That is, the patient's experience of their illness, quality of life, and functioning; their values, preferences and goals for health care.<sup>4</sup> Loss of the ability to live independently is a major concern for the elderly;<sup>5,6</sup> it is clearly a patient-centred outcome, and has been associated with postoperative readmissions and death after hospital discharge.<sup>5</sup>

Specific peri-procedural complications such as surgical site infection, respiratory failure, delirium, and myocardial infarction are clearly important to patients and physicians alike, but reliable and consistent detection is problematic. In any case such information is an incomplete description of the overall success of surgery and other perioperative care, and does not describe the impact of such complications on functioning and need for institutionalization. Similar challenges occur when nominating endpoints in clinical trials, including a lack of standardisation,<sup>7</sup> need for adjudication, and uncertainty about the overall health impact of each endpoint on a patient's recovery. There is a growing acceptance that

1  
2  
3 outcome measures used in clinical trials should be determined in partnership by patients  
4  
5 and physician-researchers, aiming to identify outcomes that are important to patients.<sup>8</sup>  
6  
7

8  
9  
10 “Days alive and out of hospital” has been shown to be a readily quantifiable and patient-  
11  
12 centred outcome measure in some chronic cardiovascular conditions such as heart failure  
13  
14 and atrial fibrillation,<sup>9-11</sup> and in geriatric medicine,<sup>12</sup> but it has not been used as an outcome  
15  
16 measure in perioperative trials. Home discharge has been proposed as a proxy for a  
17  
18 patient’s recovery after surgery,<sup>13</sup> and is estimated when using the American College of  
19  
20 Surgeons’ Surgical Risk Calculator,<sup>14</sup> but this does not account for readmissions or early  
21  
22 deaths, although the latter collects and reports some of this information.<sup>15</sup>  
23  
24  
25  
26  
27

28  
29 Our own work and that of others have shown that early return home after surgery,<sup>6 16-18</sup> and  
30  
31 medical illnesses such as stroke,<sup>19 20</sup> is highly valued by patients but could be undermined if  
32  
33 the patient were to be transferred to another type of nursing facility. A more favourable  
34  
35 perioperative outcome measure should account for both the initial hospital stay associated  
36  
37 with the index surgery, rehospitalisation due to post-discharge complications, discharge to  
38  
39 institutional care, and early deaths.  
40  
41  
42  
43  
44

45  
46 We thus chose to evaluate the utility of “days (alive and) at home” within 30 days of surgery  
47  
48 (DAH<sub>30</sub>) in the surgical/perioperative setting as a patient-centred outcome measure for  
49  
50 perioperative clinical trials and quality improvement activities. Our hypothesis was that  
51  
52 DAH<sub>30</sub> would be lower in higher risk patients, those undergoing more extensive surgery, and  
53  
54 in those with complications after surgery.  
55  
56  
57  
58  
59  
60

## Methods

This manuscript was written in adherence to the Strengthening The Reporting of Observational Studies in Epidemiology (STROBE) statement.<sup>21</sup>

### Study Design and Data Sources

Data were obtained from each of seven recently completed clinical trials that prospectively enrolled patients undergoing various types of elective and emergency surgery at the Alfred Hospital in Melbourne, Australia. The cohort consisted of four multicentre randomised trials and three before-and-after studies (see Table S1 in the Supplementary Appendix).<sup>22-29</sup> For each trial we collected a comparable set of patient demographic and perioperative characteristics, and clinical outcome measures, including complete hospital discharge, discharge destination (home, rehabilitation facility, nursing home) and re-admission data. All but one study<sup>28</sup> prospectively recorded re-admission data; for the latter study we could obtain this information retrospectively from our hospital information system. Both the present study and each of the original trials received institutional ethics committee approval.

### Patients

Patients 18 years and older undergoing an elective or non-elective inpatient operation enrolled in one of the aforementioned trials were included. Study inclusion criteria were established for the original studies and typically identified those at increased risk of postoperative complications. In all cases patients provided informed consent before enrolment in the original trials.

### *Patient involvement*

Hospital patients have previously indicated the importance of returning home after hospitalisation for medical or surgical conditions,<sup>6 16-20</sup> but we did not involve patients or their carers in the design or conduct of this study.

### **Risk Factors and Outcomes**

Perioperative data included patient demographics, comorbidity, functional status, type and duration of surgery, hospital length of stay, hospital readmission(s), and in all but one study<sup>28</sup> we prospectively collected selected complications at 30 days after surgery: wound infection, myocardial infarction, stroke, pulmonary embolism, cardiac arrest, and death.

Hospital discharge data were used to calculate hospital length of stay. Whether the patient was discharged from hospital to their home or to a nursing facility was obtained from the electronic medical record, but for those admitted to a rehabilitation facility we were unable to ascertain the number of days admitted before eventual discharge home. For those readmitted to hospital we combined the original length of stay with subsequent hospital stay(s) to calculate total length of stay within 30 days postoperatively.

DAH<sub>30</sub> was calculated using mortality and hospitalisation data from the date of the index surgery (Day 0). For example, if a patient died on day 2 after their surgery, they were assigned 0 DAH<sub>30</sub>, if a patient was discharged from hospital on Day 6 after surgery but was subsequently readmitted for 4 days before their second hospital discharge, then they were assigned 20 DAH<sub>30</sub>. We were unable to reliably collect secondary length of stay for rehabilitation facilities - we thus did a secondary analysis assuming the length of stay in a



1  
2  
3 rehabilitation facility was 5 extra days. That is,  $DAH_{30\text{-rehab}}$  was calculated as  $DAH_{30-5}$  in a  
4  
5 secondary analysis.  
6  
7  
8  
9

10 For the multicentre trials,<sup>22-24</sup> a 12-lead electrocardiograph was recorded preoperatively and  
11  
12 on day 1 and 3 after surgery. Blood for troponin (or if unavailable, creatine kinase-  
13  
14 myocardial band) measurement was collected at 6 to 12 hours after surgery and on the first  
15  
16 three postoperative days. In all trials laboratory tests were otherwise ordered if clinically  
17  
18 indicated. Each complication was defined within the original study protocol and in all cases a  
19  
20 consistent definition was used. In brief, surgical site infection was confirmed if associated  
21  
22 with purulent discharge, with or without a positive microbial culture; or pathogenic  
23  
24 organisms isolated from aseptically obtained microbial culture,<sup>30</sup> although the most recent  
25  
26 trial<sup>27</sup> included documentation of a physician's diagnosis in this definition.<sup>31</sup> Pneumonia was  
27  
28 confirmed by a new pulmonary infiltrate reported by chest x-ray or computerized tomo-  
29  
30 graphy, in association with at least one of: temperature  $>38^{\circ}\text{C}$ , white cell count  $>12,000/\text{ml}$ ,  
31  
32 or positive sputum culture that was not heavily contaminated with oral flora or that  
33  
34 corresponded with positive blood cultures. Myocardial infarction was defined according to  
35  
36 the third universal definition,<sup>32</sup> requiring elevated cardiac biomarker plus at least one of the  
37  
38 following: (i) ischaemic symptoms, (ii) pathological Q waves, (iii) electrocardiographic  
39  
40 changes indicative of ischemia, (iv) coronary artery intervention or (v) new wall motion  
41  
42 abnormality on echocardiography or scanning; or autopsy finding of myocardial infarction.  
43  
44  
45  
46  
47  
48  
49  
50 The threshold for significant elevated troponin was the hospital laboratory's 99th percentile  
51  
52 of a normal reference population (upper reference limit), according to recent  
53  
54 recommendations.<sup>33</sup> Stroke was confirmed if a new neurological deficit persisting for at  
55  
56  
57  
58  
59  
60

1  
2  
3 least 24 hours, verified by neurologist assessment and/or computerized tomography or  
4  
5 magnetic resonance imaging.  
6  
7  
8

### 9 10 **Statistical Analysis**<sup>34 35</sup>

11  
12 Data were first merged and checked for inconsistencies. Patient age was grouped into 10-  
13 year categories, and hourly cut-points for duration of surgery (2, 3, and 4 h) were created to  
14 generate approximately similar group sizes and facilitate clinical interpretation. DAH<sub>30</sub> was  
15 analysed using quantile regression.<sup>36</sup> This approach allows the modelling of any quantile of a  
16 continuous endpoint, here DAH<sub>30</sub>, as a linear combination of the covariates. As DAH<sub>30</sub> is left  
17 skewed with a spike at zero, it is more relevant to model the median (or alternatively, the  
18 75<sup>th</sup> percentile) that is closer to the major distribution mode and directly interpretable. No  
19 assumption on the true distribution of the endpoint is required. Raw and adjusted medians  
20 and their 95% confidence intervals (CIs) obtained by bootstrapping with 1000 replicates  
21 were reported for key predictors. The adjusted models included age by 10-year categories,  
22 sex, ASA, surgery time (< 2h, 2.0 - 2.99, 3.0 -3.99, ≥4.0). A global test of effect of any key  
23 predictor was carried out using a quasi-likelihood ratio test.<sup>37</sup> Quantile regression was also  
24 used to test median differences between those with and without complications, and by  
25 postoperative complications. Supplementary analyses were done for Q3. All analyses were  
26 done using Stata 14.0 except the LRT analysis only available in SAS. All tests were two-sided  
27 and performed at level  $\alpha=0.05$ ; no correction was made for multiple comparisons.  
28  
29  
30  
31  
32  
33  
34  
35  
36  
37  
38  
39  
40  
41  
42  
43  
44  
45  
46  
47  
48  
49  
50  
51  
52  
53  
54

### 55 **Results**

56  
57  
58  
59  
60

1  
2  
3 A total of 2109 eligible patients 18 years and older were enrolled into clinical trials and  
4  
5 underwent inpatient operations at the Alfred Hospital between March 2006 and September  
6  
7 2016. The number of patients enrolled in each of the trials is detailed in the Supplement  
8  
9 (Supplementary Table 1). The cohort included 1427 male patients (67.7%) with a mean (SD)  
10  
11 age of 65 (12) years who underwent a range of inpatient operations (Table 1). Most  
12  
13 operations were cardiac surgical procedures (679 [32.2%]), followed by general (489  
14  
15 [23.2%]), urologic (315 [14.9%]), and neurosurgical procedures (220 [10.4%]).  
16  
17  
18  
19

20  
21  
22 There was a bimodal, skewed distribution of DAH<sub>30</sub> (Figure 1). The spike at zero consisted of  
23  
24 19 patients (1.0%) that died, and 40 patients remaining in hospital at least 30 days after  
25  
26 surgery. DAH<sub>30</sub> and rates of admission to a rehabilitation centre varied according to type of  
27  
28 surgery (Table 2).  
29  
30  
31  
32

33  
34 One or more complications occurred in 263 (14.2%) patients. Overall, 245 (11.6%) patients  
35  
36 were admitted to a rehabilitation facility and 150 (7.1%) were readmitted within 30 days of  
37  
38 surgery. The median DAH<sub>30</sub> was 23.7 (95% CI, 23.5 to 24.0), but this varied according to type  
39  
40 of surgery (Table 1).  
41  
42  
43  
44  
45

46  
47 The median DAH<sub>30</sub> was significantly less in older patients, current smokers, diabetics, those  
48  
49 with poorer physical functioning, and undergoing longer operations (Table 2). These  
50  
51 associations remained after adjustment for all of these covariates and patient sex (Table 2).  
52  
53 The individual complications of myocardial infarction, stroke, pulmonary embolism, and  
54  
55 surgical site infection were each associated with shorter DAH<sub>30</sub> (Table 3) in a raw analysis.  
56  
57  
58  
59  
60

1  
2  
3 Hospital readmission was also a factor, decreasing median DAH<sub>30</sub> when compared with  
4  
5 those not readmitted to hospital, 17.9 (95% CI, 16.3 to 19.5) vs 23.9 (95% CI, 23.8 to 23.9),  
6  
7 respectively (P<0.0001).  
8  
9

10  
11  
12 After adjusting for patient age, sex, ASA physical status and duration of surgery, the  
13  
14 occurrence of any postoperative complication was associated with fewer days at home after  
15  
16 surgery (difference 3.0 [95% CI, 2.1 to 4.0] days; P<0.0001).  
17  
18  
19

### 20 21 22 **Supplementary Analyses**

23  
24 The above findings were consistent when analysing the 3<sup>rd</sup> quartile distributions and  
25  
26 differences (Tables S2-S4 in the Supplementary Appendix), and after accounting for the  
27  
28 additional loss of days at home because of admission to a rehabilitation centre (Tables S5  
29  
30 and S6 in the Supplementary Appendix).  
31  
32  
33

### 34 35 36 **Discussion**

37  
38 We found that DAH<sub>30</sub> is a valid and readily-obtainable patient-centred outcome measure  
39  
40 that could be used to better inform patients and physicians when planning surgery. Unlike  
41  
42 previous related measures, DAH<sub>30</sub> accounts for each of delayed hospital discharge because  
43  
44 of postoperative complications, discharge to a rehabilitation centre or other post-acute care  
45  
46 nursing facility, rehospitalisations, and postoperative deaths. It thus captures much of the  
47  
48 surgical experience, integrating efficacy, quality and safety, and thus reflecting value-based  
49  
50 care. It can also be risk-adjusted for bench-marking purposes. DAH<sub>30</sub> will be maximized  
51  
52 when patients recover free of complications after surgery, with optimal comfort and  
53  
54 functioning - aligning with patient values and preferences, and goals for health care.<sup>4</sup>  
55  
56  
57  
58  
59  
60

1  
2  
3  
4  
5 The US has a triple aim of improving the healthcare system: improving the patient  
6 experience of care, improving the health of populations, and reducing per capita costs of  
7 healthcare.<sup>38</sup> DAH<sub>30</sub> seems to be useful, generic metric in this regard.<sup>39</sup> DAH<sub>30</sub> is a measure  
8 of the overall burden of care, both in hospital and post-discharge. The perceived success of  
9 a hospital discharge plan as perceived by the patient and their principal carer depends on  
10 clear communication and meeting expectations.<sup>40</sup> DAH<sub>30</sub> offers transparency and  
11 opportunities for benchmarking performance, both of which are important components of  
12 quality improvement.<sup>13</sup> It may influence alternative payment contracts for hospitals.  
13  
14  
15  
16  
17  
18  
19  
20  
21  
22  
23

24  
25  
26 Postoperative complications add to hospital costs and increase length of stay.<sup>41</sup> Higher  
27 episode payments at “lower-quality” hospitals have been attributed to higher rates of  
28 complications, 30-day readmissions, and post-discharge ancillary care.<sup>41</sup> Serious  
29 postoperative complications are both strongly associated with readmission,<sup>5 17</sup> increasing  
30 the risk by 6.7-fold, and loss of independence.<sup>5</sup> Readmission is a frequent, costly, and  
31 sometimes life-threatening event that is associated with gaps in follow-up care.<sup>15 17 42</sup>  
32  
33 Readmission after surgery is thus an established quality indicator. Trends in readmissions  
34 suggest that US hospitals are responding to incentives to reduce readmissions under the  
35 Affordable Care Act.<sup>43 44</sup> Hospital readmission rates are not highly correlated with mortality  
36 rates,<sup>45</sup> so they offer an independent and more sensitive measure of quality. Even though  
37 some readmissions are due to chronic medical conditions,<sup>42</sup> optimal perioperative care  
38 should keep these to a minimum and such improvements should be reflected in more  
39  
40  
41  
42  
43  
44  
45  
46  
47  
48  
49  
50  
51  
52  
53  
54  
55 DAH<sub>30</sub>.  
56  
57  
58  
59  
60

1  
2  
3 Enhanced recovery after surgery programs are designed to reduce complications and  
4  
5 shorten length of stay. But this sometimes comes at the cost of increased hospital re-  
6  
7 admissions.<sup>46 47</sup> The measurement and reporting of DAH<sub>30</sub> would identify this and hopefully  
8  
9 encourage further quality improvement. Planned discharge to a rehabilitation facility  
10  
11 sometimes forms part of an enhanced recovery pathway, and in any case may not be seen  
12  
13 by the patient or their family as indicating a poor outcome. Therefore, calculation of DAH<sub>30</sub>  
14  
15 in some studies could incorporate days spent in a rehabilitation facility as equivalent to  
16  
17 being home. In contrast, unplanned admission to a rehabilitation facility would indicate  
18  
19 poor care or adverse outcome, and this should be retained in the calculation of DAH<sub>30</sub>. Care  
20  
21 should be taken to avoid missing out-of-network hospitalizations, particularly if relying on  
22  
23 hospital system electronic medical records. The latter will otherwise enhance the efficiency  
24  
25 of data collection.  
26  
27  
28  
29  
30  
31  
32

33 Composite endpoints used in perioperative trials are often flawed,<sup>48-50</sup> typically used to  
34  
35 increase the number of events in order to enhance statistical power. DAH<sub>30</sub>, as a numerical  
36  
37 patient-centred measure, provides more statistical power, can be reliably measured and has  
38  
39 direct patient-centredness. Although some postoperative complications and poor survival  
40  
41 can manifest many months after surgery in those recovering from major surgery or critical  
42  
43 illness,<sup>29 51 52</sup> extending measurement out to 90 days after surgery (i.e. DAH<sub>90</sub>) may not  
44  
45 necessarily provide new or different information because the extra burden and costs of  
46  
47 further data collection may outweigh the benefits of the extra information obtained. In  
48  
49 addition, disease progression or other aspects of life may confound outcome evaluation of  
50  
51 perioperative care.  
52  
53  
54  
55  
56  
57  
58  
59  
60

1  
2  
3 Our study has several limitations. First, postoperative in-hospital deaths have a major  
4 influence on the calculation of DAH<sub>30</sub>; this is arguably appropriate because perioperative  
5 studies should weight this as the most extreme adverse outcome. More sophisticated  
6 modelling could jointly model the risk of death and DAH<sub>30</sub> in those discharged alive, and such  
7 modelling would be particularly important if the in-hospital mortality rate is moderate or greater.  
8  
9 Second, different health care settings can be expected to have varied casemix and hospital  
10 discharge processes, and hospital discharge may be delayed because of social and process  
11 issues unrelated to complications or quality of care. DAH<sub>30</sub> should therefore be risk-  
12 adjusted.<sup>53</sup> Third, DAH<sub>30</sub> doesn't provide specific information on which aspects of in-hospital  
13 or post-discharge management influences where patients reside after hospitalization, or the  
14 post-discharge use and effectiveness of family physician or other health care resources.  
15  
16 Fourth, DAH<sub>30</sub> is an overall measure of recovery profile and does not inform us about  
17 specific complications, level of functioning or wellbeing. Such aspects should also be  
18 included when conducting outcome studies. Fifth, obtaining accurate data on days spent in  
19 a rehabilitation facility relies on further follow-up or accurate electronic records. Future  
20 studies using DAH<sub>30</sub> should prospectively plan to reliably obtain such data.  
21  
22  
23  
24  
25  
26  
27  
28  
29  
30  
31  
32  
33  
34  
35  
36  
37  
38  
39  
40  
41  
42

## 43 CONCLUSIONS

44 DAH<sub>30</sub> is a valid and readily-obtainable, generic, patient-centred outcome measure that can  
45 better inform patients and physicians when planning surgery. It is a suitable outcome  
46 measure for both quality improvement and perioperative clinical trials. DAH<sub>30</sub> accounts for  
47 prolonged hospital stay, discharge to any post-acute care nursing facility, rehospitalizations,  
48 and early deaths. It thus captures much of the patient-centred experience, and will be  
49 maximal when effective and efficient care is achieved.  
50  
51  
52  
53  
54  
55  
56  
57  
58  
59  
60

1  
2  
3  
4  
5  
6  
7  
8  
9  
10  
11  
12  
13  
14  
15  
16  
17  
18  
19  
20  
21  
22  
23  
24  
25  
26  
27  
28  
29  
30  
31  
32  
33  
34  
35  
36  
37  
38  
39  
40  
41  
42  
43  
44  
45  
46  
47  
48  
49  
50  
51  
52  
53  
54  
55  
56  
57  
58  
59  
60

For peer review only



1  
2  
3 **Contributor statement:** PM designed the study, oversaw the ethics application, devised the  
4 statistical analysis plan, and drafted and revised the paper. He is guarantor. MS provided  
5 intellectual input into the study design, and drafted and revised the paper. SH analysed the  
6 data and drafted and revised the paper. SW prepared the ethics application, monitored the  
7 data entry and checking, and drafted and revised the paper. DM provided intellectual input  
8 into the study design, and drafted and revised the paper. SM provided intellectual input into  
9 the study design, and drafted and revised the paper. IS retrieved and entered all study data,  
10 and revised the paper. AF contributed to the statistical analysis, and drafted and revised the  
11 paper.  
12  
13  
14  
15  
16  
17  
18  
19  
20  
21  
22  
23  
24  
25  
26

27 **Transparency declaration:** The lead author\* affirms that this manuscript is an honest,  
28 accurate, and transparent account of the study being reported; that no important aspects of  
29 the study have been omitted; and that any discrepancies from the study as planned have  
30 been explained.  
31  
32  
33  
34  
35  
36  
37  
38  
39

40 **Acknowledgment:** The authors would like to thank the study participants for their interest  
41 and preparedness to consent to the original trials. PM is supported in part by Practitioner  
42 Fellowships from the Australian National Health and Medical Research Council (NHMRC).  
43  
44  
45  
46  
47  
48  
49

50 **Funding:** This work was supported by the Australian NHMRC, the New Zealand Health  
51 Research Council, and the Australian and New Zealand College of Anaesthetists, and  
52 Monash University (Melbourne, Australia).  
53  
54  
55  
56  
57  
58  
59  
60

1  
2  
3  
4  
5  
6  
7  
8  
9  
10  
11  
12  
13  
14  
15  
16  
17  
18  
19  
20  
21  
22  
23  
24  
25  
26  
27  
28  
29  
30  
31  
32  
33  
34  
35  
36  
37  
38  
39  
40  
41  
42  
43  
44  
45  
46  
47  
48  
49  
50  
51  
52  
53  
54  
55  
56  
57  
58  
59  
60

**Additional data:** No additional data available.

**Competing interests:** None of the authors have any conflicts of interest

**Ethics approval:** This trial has been approved by the Ethics Committees of Alfred Health,  
Melbourne, Australia.

For peer review only

## References

1. Austin JM, McGlynn EA, Pronovost PJ. Fostering Transparency in Outcomes, Quality, Safety, and Costs. *Jama* 2016 doi: 10.1001/jama.2016.14039 [published Online First: 2016/09/27]
2. Lynn J, McKethan A, Jha AK. Value-Based Payments Require Valuing What Matters to Patients. *JAMA* 2015;314(14):1445-6. doi: 10.1001/jama.2015.8909
3. Porter ME. What is value in health care? *N Engl J Med* 2010;363(26):2477-81. doi: 10.1056/NEJMp1011024 [published Online First: 2010/12/15]
4. Lavalley DC, Chenok KE, Love RM, et al. Incorporating Patient-Reported Outcomes Into Health Care To Engage Patients And Enhance Care. *Health Aff (Millwood)* 2016;35(4):575-82. doi: 10.1377/hlthaff.2015.1362 [published Online First: 2016/04/06]
5. Berian JR, Mohanty S, Ko CY, et al. Association of Loss of Independence With Readmission and Death After Discharge in Older Patients After Surgical Procedures. *JAMA Surg* 2016;151(9):e161689. doi: 10.1001/jamasurg.2016.1689 [published Online First: 2016/07/14]
6. Fried TR, Bradley EH, Towle VR, et al. Understanding the treatment preferences of seriously ill patients. *N Engl J Med* 2002;346(14):1061-6. doi: 10.1056/NEJMsa012528
7. Goldfarb M, Drudi L, Almohammadi M, et al. Outcome Reporting in Cardiac Surgery Trials: Systematic Review and Critical Appraisal. *J Am Heart Assoc* 2015;4(8):e002204. doi: 10.1161/jaha.115.002204 [published Online First: 2015/08/19]
8. Chalmers I, Clarke M. Outcomes that matter to patients in tombstone trials. *Lancet* 2001;358(9293):1649. doi: S0140673601066892 [pii] [published Online First: 2001/11/22]
9. Ariti CA, Cleland JG, Pocock SJ, et al. Days alive and out of hospital and the patient journey in patients with heart failure: Insights from the candesartan in heart failure: assessment of reduction in mortality and morbidity (CHARM) program. *Am Heart J* 2011;162(5):900-6. doi: 10.1016/j.ahj.2011.08.003
10. Wasywich CA, Gamble GD, Whalley GA, et al. Understanding changing patterns of survival and hospitalization for heart failure over two decades in New Zealand: utility of 'days alive and out of hospital' from epidemiological data. *Eur J Heart Fail* 2010;12(5):462-8. doi: 10.1093/eurjhf/hfq027
11. Xian Y, Wu J, O'Brien EC, et al. Real world effectiveness of warfarin among ischemic stroke patients with atrial fibrillation: observational analysis from Patient-Centered Research into Outcomes Stroke Patients Prefer and Effectiveness Research (PROSPER) study. *BMJ* 2015;351:h3786. doi: 10.1136/bmj.h3786
12. Ellis G, Whitehead MA, Robinson D, et al. Comprehensive geriatric assessment for older adults admitted to hospital: meta-analysis of randomised controlled trials. *Bmj* 2011;343:d6553. doi: 10.1136/bmj.d6553 [published Online First: 2011/10/29]
13. Hyder JA, Hirschberg RE, Nguyen LL. Home discharge as a performance metric for surgery. *JAMA Surg* 2015;150(2):96-7. doi: 10.1001/jamasurg.2014.1725 [published Online First: 2014/12/05]
14. Hyder JA, Wakeam E, Habermann EB, et al. Derivation and validation of a simple calculator to predict home discharge after surgery. *J Am Coll Surg* 2014;218(2):226-36. doi: 10.1016/j.jamcollsurg.2013.11.002
15. Merkow RP, Ju MH, Chung JW, et al. Underlying reasons associated with hospital readmission following surgery in the United States. *JAMA* 2015;313(5):483-95. doi: 10.1001/jama.2014.18614
16. Boney O, Bell M, Bell N, et al. Identifying research priorities in anaesthesia and perioperative care: final report of the joint National Institute of Academic Anaesthesia/James Lind Alliance Research Priority Setting Partnership. *BMJ Open* 2015;5(12):e010006. doi: 10.1136/bmjopen-2015-010006 [published Online First: 2015/12/18]
17. Hinami K, Bilimoria KY, Kallas PG, et al. Patient experiences after hospitalizations for elective surgery. *Am J Surg* 2014;207(6):855-62. doi: 10.1016/j.amjsurg.2013.04.014

- 1  
2  
3 18. Burns KE, Jacob SK, Aguirre V, et al. Stakeholder Engagement in Trial Design: Survey of Visitors to  
4 Critically Ill Patients Regarding Preferences for Outcomes and Treatment Options during  
5 Weaning from Mechanical Ventilation. *Ann Am Thorac Soc* 2016;13(11):1962-68. doi:  
6 10.1513/AnnalsATS.201606-445OC [published Online First: 2016/09/07]  
7  
8 19. Hannah D, Lindholm B, Maisch L. Certain uncertainty: life after stroke from the patient's  
9 perspective. *Circ Cardiovasc Qual Outcomes* 2014;7(6):968-9. doi:  
10 10.1161/CIRCOUTCOMES.114.001315  
11  
12 20. Xian Y, O'Brien EC, Fonarow GC, et al. Patient-Centered Research into Outcomes Stroke Patients  
13 Prefer and Effectiveness Research: Implementing the patient-driven research paradigm to  
14 aid decision making in stroke care. *Am Heart J* 2015;170(1):36-45, 45.e1-11. doi:  
15 10.1016/j.ahj.2015.04.008 [published Online First: 2015/06/22]  
16  
17 21. von Elm E, Altman DG, Egger M, et al. The Strengthening the Reporting of Observational Studies  
18 in Epidemiology (STROBE) statement: guidelines for reporting observational studies. *Lancet*  
19 2007;370(9596):1453-7. doi: 10.1016/S0140-6736(07)61602-X  
20  
21 22. Myles PS, Leslie K, Chan MT, et al. The safety of addition of nitrous oxide to general anaesthesia  
22 in at-risk patients having major non-cardiac surgery (ENIGMA-II): a randomised, single-blind  
23 trial. *Lancet* 2014;384(9952):1446-54. doi: 10.1016/s0140-6736(14)60893-x [published  
24 Online First: 2014/08/22]  
25  
26 23. Myles PS, Smith JA, Forbes A, et al. Stopping vs. Continuing Aspirin before Coronary Artery  
27 Surgery. *N Engl J Med* 2016;374(8):728-37. doi: 10.1056/NEJMoa1507688  
28  
29 24. Myles PS, Smith JA, Forbes A, et al. Tranexamic acid in coronary artery surgery. *N Engl J Med*  
30 2016;2016(in press)  
31  
32 25. Thompson EG, Gower ST, Beilby DS, et al. Enhanced recovery after surgery program for elective  
33 abdominal surgery at three Victorian hospitals. *Anaesth Intensive Care* 2012;40(3):450-9.  
34 [published Online First: 2012/05/15]  
35  
36 26. Christelis N, Wallace S, Sage CE, et al. An enhanced recovery after surgery program for hip and  
37 knee arthroplasty. *Med J Aust* 2015;202(7):363-8.  
38  
39 27. Glassford NJ, Myles P, Bellomo R. The Australian approach to peri-operative fluid balance. *Curr*  
40 *Opin Anaesthesiol* 2012;25(1):102-10. doi: 10.1097/ACO.0b013e32834decd7 [published  
41 Online First: 2011/11/25]  
42  
43 28. Vijay A, Grover A, Coulson T, et al. Perioperative management of patients treated with  
44 angiotensin-converting enzyme inhibitors and angiotensin II receptor blockers. *Anaesth*  
45 *Intensive Care* 2016;in press  
46  
47 29. Shulman MA, Myles PS, Chan MT, et al. Measurement of disability-free survival after surgery.  
48 *Anesthesiology* 2015;122(3):524-36. doi: 10.1097/ALN.0000000000000586  
49  
50 30. Mangram A, Horan T, Pearson M, et al. Guideline for prevention of surgical site infection, 1999.  
51 *Infection Control and Hospital Epidemiology* 1999;20:247-77.  
52  
53 31. Degnim AC, Throckmorton AD, Boostrom SY, et al. Surgical site infection after breast surgery:  
54 impact of 2010 CDC reporting guidelines. *Ann Surg Oncol* 2012;19(13):4099-103. doi:  
55 10.1245/s10434-012-2448-6  
56  
57 32. Thygesen K, Alpert JS, Jaffe AS, et al. Third universal definition of myocardial infarction.  
58 *Circulation* 2012;126(16):2020-35. doi: 10.1161/CIR.0b013e31826e1058  
59  
60 CIR.0b013e31826e1058 [pii] [published Online First: 2012/08/28]  
33. Leonardi S, Armstrong PW, Schulte PJ, et al. Implementation of standardized assessment and  
reporting of myocardial infarction in contemporary randomized controlled trials: a  
systematic review. *Eur Heart J* 2013;34(12):894-902d. doi: 10.1093/eurheartj/ehh003  
ehh003 [pii] [published Online First: 2013/01/29]  
34. WMA Declaration of Helsinki - Ethical Principles for Medical Research Involving Human Subjects.  
Available from [www.wma.net/en/30publications/10policies/b3/index.html](http://www.wma.net/en/30publications/10policies/b3/index.html) (accessed 17  
October 2012).

- 1
- 2
- 3 35. Caironi P, Tognoni G, Masson S, Fumagalli R, Persenti A, Romero M, et al. Albumin replacement
- 4 in patients with severe sepsis or septic shock. *N Engl J Med*. 2014. doi:
- 5 10.1056/NEJMoa1305727.
- 6
- 7 36. Koenker R, Bassett G. Regression quantiles. *Econometrica* 1978;46:33–50.
- 8
- 9 37. Koenker R, Machado JAF. Goodness of fit and related inference processes for quantile
- 10 regression. *Journal of the American Statistical Association* 1999;94:1296–310.
- 11
- 12 38. Berwick DM, Nolan TW, Whittington J. The triple aim: care, health, and cost. *Health Aff*
- 13 (*Millwood*) 2008;27(3):759–69. doi: 10.1377/hlthaff.27.3.759
- 14
- 15 39. Lee VS, Kawamoto K, Hess R, et al. Implementation of a Value-Driven Outcomes Program to
- 16 Identify High Variability in Clinical Costs and Outcomes and Association With Reduced Cost
- 17 and Improved Quality. *Jama* 2016;316(10):1061–72. doi: 10.1001/jama.2016.12226
- 18 [published Online First: 2016/09/14]
- 19
- 20 40. Bauer M, Fitzgerald L, Haesler E, et al. Hospital discharge planning for frail older people and their
- 21 family. Are we delivering best practice? A review of the evidence. *J Clin Nurs*
- 22 2009;18(18):2539–46. doi: 10.1111/j.1365-2702.2008.02685.x [published Online First:
- 23 2009/04/21]
- 24
- 25 41. Birkmeyer JD, Gust C, Dimick JB, et al. Hospital quality and the cost of inpatient surgery in the
- 26 United States. *Ann Surg* 2012;255(1):1–5. doi: 10.1097/SLA.0b013e3182402c17
- 27
- 28 42. Jencks SF, Williams MV, Coleman EA. Rehospitalizations among patients in the Medicare fee-for-
- 29 service program. *N Engl J Med* 2009;360(14):1418–28. doi: 10.1056/NEJMsa0803563
- 30 [published Online First: 2009/04/03]
- 31
- 32 43. Zuckerman RB, Sheingold SH, Orav EJ, et al. Readmissions, Observation, and the Hospital
- 33 Readmissions Reduction Program. *N Engl J Med* 2016;374(16):1543–51. doi:
- 34 10.1056/NEJMsa1513024
- 35
- 36 44. Danino JF, Taylor T, Metcalfe CW, et al. Readmission rates and financial penalties after ear, nose
- 37 and throat surgery: how can we improve? *Br J Hosp Med (Lond)* 2015;76(11):655–7. doi:
- 38 10.12968/hmed.2015.76.11.655
- 39
- 40 45. Hannan EL, Zhong Y, Lahey SJ, et al. 30-Day Readmissions After Coronary Artery Bypass Graft
- 41 Surgery in New York State. *JACC: Cardiovascular Interventions* 2011;4(5):569–76. doi:
- 42 <http://dx.doi.org/10.1016/j.jcin.2011.01.010>
- 43
- 44 46. Ahmed J, Khan S, Lim M, et al. Enhanced recovery after surgery protocols - compliance and
- 45 variations in practice during routine colorectal surgery. *Colorectal Dis* 2012;14(9):1045–51.
- 46 doi: 10.1111/j.1463-1318.2011.02856.x [published Online First: 2011/10/12]
- 47
- 48 47. Group EC. The Impact of Enhanced Recovery Protocol Compliance on Elective Colorectal Cancer
- 49 Resection: Results From an International Registry. *Ann Surg* 2015;261(6):1153–9. doi:
- 50 10.1097/SLA.0000000000001029
- 51
- 52 48. Myles PS, Devereaux PJ. Pros and cons of composite endpoints in anesthesia trials.
- 53 *Anesthesiology* 2010;113(4):776–8. doi: 10.1097/ALN.0b013e3181ee2ceb [published Online
- 54 First: 2010/09/03]
- 55
- 56 49. Ferreira-Gonzalez I, Permanyer-Miralda G, Busse JW, et al. Composite outcomes can distort the
- 57 nature and magnitude of treatment benefits in clinical trials. *Ann Intern Med*
- 58 2009;150(8):566–7. doi: 10.1097/ALN.0b013e3181ee2ceb [pii] [published Online First: 2009/04/22]
- 59
- 60 50. Pogue J, Thabane L, Devereaux PJ, et al. Testing for heterogeneity among the components of a
- binary composite outcome in a clinical trial. *BMC Med Res Methodol* 2010;10:49. doi:
- 10.1186/1471-2288-10-49
- 51
- 52 51. Khuri SF, Henderson WG, DePalma RG, et al. Determinants of long-term survival after major
- 53 surgery and the adverse effect of postoperative complications. *Ann Surg* 2005;242(3):326–
- 54 41; discussion 41–3. doi: 10.1097/ALN.0b013e3181ee2ceb [pii] [published Online First:
- 55 2005/09/02]
- 56
- 57
- 58
- 59
- 60

1  
2  
3 52. Myles PS, Peyton P, Silbert B, et al. Perioperative epidural analgesia for major abdominal surgery  
4 for cancer and recurrence-free survival: randomised trial. *BMJ* 2011;342:d1491. doi:  
5 10.1136/bmj.d1491  
6

7 bmj.d1491 [pii] [published Online First: 2011/03/31]

8 53. Sheingold SH, Zuckerman R, Shartz A. Understanding Medicare Hospital Readmission Rates  
9 And Differing Penalties Between Safety-Net And Other Hospitals. *Health Aff (Millwood)*  
10 2016;35(1):124-31. doi: 10.1377/hlthaff.2015.0534  
11  
12  
13  
14  
15  
16  
17  
18  
19  
20  
21  
22  
23  
24  
25  
26  
27  
28  
29  
30  
31  
32  
33  
34  
35  
36  
37  
38  
39  
40  
41  
42  
43  
44  
45  
46  
47  
48  
49  
50  
51  
52  
53  
54  
55  
56  
57  
58  
59  
60

For peer review only

**Table 1. Days at Home up to 30 Days after Surgery (DAH<sub>30</sub>) According to Types of Surgery.**

| Surgery                        | No. of patients | No. admitted to a rehabilitation hospital (%) | Median (95% CI) DAH <sub>30</sub> <sup>†</sup> |
|--------------------------------|-----------------|-----------------------------------------------|------------------------------------------------|
| Cardiac                        | 679             | 54 (8.0)                                      | 22.8 (22.6-22.9)                               |
| Orthopaedic                    | 289             | 122 (42)                                      | 21.9 (21.2-22.6)                               |
| Neurosurgery                   | 220             | 9 (4.0)                                       | 22.8 (22.2-23.5)                               |
| Colorectal                     | 118             | 8 (6.8)                                       | 24.9 (23.9-26.0)                               |
| Urology                        | 315             | 26 (8.3)                                      | 23.8 (23.0-24.5)                               |
| Vascular                       | 56              | 1 (1.8)                                       | 26.0 (24.3-27.3)                               |
| Ear, nose, throat              | 99              | 17 (17)                                       | 25.8 (24.9-27.0)                               |
| Oesophagogastric/hepatobiliary | 253             | 4 (1.6)                                       | 24.9 (23.8-26.1)                               |
| Thoracic                       | 28              | 2 (7.1)                                       | 22.8 (17.8-27.8)                               |
| Other                          | 52              | 2 (3.8)                                       | 28.8 (27.7-30.0)                               |

<sup>†</sup> hospital days do not include those spent in a rehabilitation facility

**Table 2. Days at Home up to 30 Days after Surgery (DAH<sub>30</sub>) According to Patient and Perioperative Characteristics.**

| Variable               | no. (%)   | Raw median DAH <sub>30</sub> (95% CI) | P value | Adjusted median DAH <sub>30</sub> (95% CI) <sup>†</sup> | P-value |
|------------------------|-----------|---------------------------------------|---------|---------------------------------------------------------|---------|
| Patient age            |           |                                       | <0.001  |                                                         | <0.001  |
| <50 years              | 220 (11)  | 24.9 (24.4 - 25.4)                    |         | 24.8 (24.4 - 25.2)                                      |         |
| 50-60 years            | 396 (19)  | 24.0 (23.4 - 24.6)                    |         | 24.4 (24.0 - 24.9)                                      |         |
| 60-70 years            | 612 (29)  | 23.9 (23.8 - 24.0)                    |         | 24.0 (23.6 - 24.3)                                      |         |
| 70-80 years            | 653 (31)  | 22.8 (22.6 - 23.0)                    |         | 23.0 (22.7 - 23.4)                                      |         |
| ≥80 years              | 228 (11)  | 22.7 (22.0 - 23.5)                    |         | 22.2 (21.7 - 22.7)                                      |         |
| Sex                    |           |                                       | 0.042   |                                                         | 0.14    |
| Male                   | 1427 (68) | 23.7 (23.1 - 24.2)                    |         | 23.7 (23.5 - 24.0)                                      |         |
| Female                 | 682 (32)  | 24.0 (23.7 - 24.2)                    |         | 23.5 (23.2 - 23.8)                                      |         |
| Smoker                 |           |                                       | 0.094   |                                                         |         |
| yes                    | 787 (37)  | 23.2 (22.6 - 23.8)                    |         | not done                                                |         |
| no                     | 1322 (63) | 23.8 (23.7 - 23.9)                    |         | not done                                                |         |
| Diabetes               |           |                                       | 0.003   |                                                         |         |
| yes                    | 697 (33)  | 23.0 (22.4 - 23.6)                    |         | not done                                                |         |
| no                     | 1412 (67) | 23.8 (23.8 - 23.9)                    |         | not done                                                |         |
| Heart failure          |           |                                       | 0.002   |                                                         |         |
| yes                    | 365 (17)  | 22.9 (22.4 - 23.4)                    |         | not done                                                |         |
| no                     | 1744 (83) | 23.8 (23.7 - 23.9)                    |         | not done                                                |         |
| ASA physical status    |           |                                       | <0.001  |                                                         | <0.001  |
| 1                      | 41 (1.9)  | 28.0 (26.3 - 29.7)                    |         | 25.9 (25.1 - 26.6)                                      |         |
| 2                      | 530 (25)  | 25.0 (24.7 - 25.3)                    |         | 24.4 (24.0 - 24.7)                                      |         |
| 3                      | 1024 (51) | 23.7 (23.1 - 24.3)                    |         | 23.6 (23.2 - 23.9)                                      |         |
| 4                      | 510 (24)  | 22.0 (21.4 - 22.5)                    |         | 23.0 (22.6 - 23.3)                                      |         |
| Duration of Surgery, h |           |                                       | <0.001  |                                                         | <0.001  |
| <2.0                   | 581 (29)  | 25.9 (25.7 - 26.1)                    |         | 25.6 (25.2 - 26.0)                                      |         |
| 2.0-2.99               | 412 (20)  | 24.0 (23.5 - 24.5)                    |         | 24.0 (23.7 - 24.3)                                      |         |
| 3.0-3.99               | 551 (26)  | 22.9 (22.8 - 23.1)                    |         | 23.1 (22.7 - 23.4)                                      |         |
| ≥4.0                   | 565 (27)  | 21.9 (21.4 - 22.3)                    |         | 22.0 (21.6 - 22.5)                                      |         |

<sup>†</sup>covariates including in the multivariable adjustment were: patient age, sex, American Society of Anesthesiologists (ASA) physical status and duration of surgery



**Table 3. Median (95% CI) Days at Home up to 30 Days after Surgery According to Postoperative Complications.**

| Variable (no. [%])                  | No. with complete data | Yes                | No                 | P value† |
|-------------------------------------|------------------------|--------------------|--------------------|----------|
| Myocardial infarction (120 [6.5])   | 1846                   | 20.8 (19.2 - 22.4) | 23.8 (23.7 - 23.9) | <0.001   |
| Stroke (13 [0.7])                   | 1846                   | 10.1 (2.5 - 17.7)  | 23.8 (23.5 - 24.0) | <0.001   |
| Pulmonary embolism (7 [0.4])        | 1846                   | 17.1 (8.4 - 25.9)  | 23.7 (23.5 - 24.0) | 0.012    |
| Cardiac arrest (3 [0.2])            | 1846                   | 17.7 (0.9 - 34.5)  | 23.7 (23.5 - 24.0) | 0.018    |
| Surgical site infection (129 [7.0]) | 1846                   | 21.0 (19.0 - 23.0) | 23.8 (23.7 - 23.9) | <0.001   |
| Any of the above (263 [14.2])       | 1846                   | 20.5 (19.1 - 21.9) | 23.9 (23.8 - 23.9) | <0.001   |
| Hospital readmission (150 [7.1])    | 2090                   | 17.9 (16.3 - 19.5) | 23.9 (23.8 - 23.9) | <0.001   |

† P values calculated using likelihood ratio test.

1  
2  
3  
4  
5  
6  
7  
8  
9  
10  
11  
12  
13  
14  
15  
16  
17  
18  
19  
20  
21  
22  
23  
24  
25  
26  
27  
28  
29  
30  
31  
32  
33  
34  
35  
36  
37  
38  
39  
40  
41  
42  
43  
44  
45  
46  
47  
48  
49  
50  
51  
52  
53  
54  
55  
56  
57  
58  
59  
60

**Figure 1. Frequency Distribution of Days at Home up to 30 Days after Surgery (n=2109). The smoothing line (kernel) is a non-parametric estimate of the probability density function.**

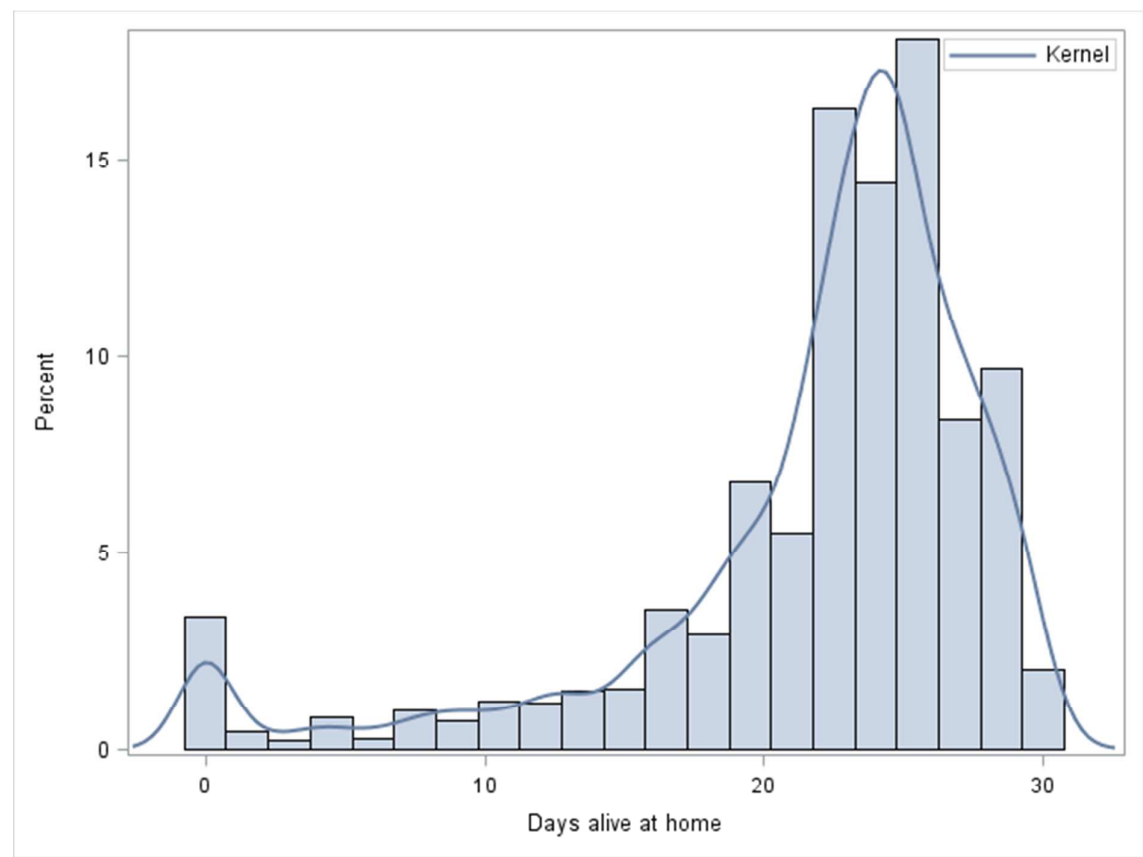

## Supplementary Appendix

This appendix has been provided by the authors to give readers additional information about their work.

Supplement to: Days Alive and at Home after Surgery

|                                                                                                                                                                                                                | Page |
|----------------------------------------------------------------------------------------------------------------------------------------------------------------------------------------------------------------|------|
| <b>Table S1.</b> Trial data sources                                                                                                                                                                            | 2    |
| <b>Table S2.</b> Third quartile (Q3) days at home up to 30 days after surgery (DAH <sub>30</sub> ) according to patient and perioperative characteristics                                                      | 3    |
| <b>Table S3.</b> Third quartile (Q3) (95% CI) days at home up to 30 days after surgery according to postoperative complications                                                                                | 4    |
| <b>Table S4.</b> Days at home up to 30 days after surgery (DAH <sub>30-rehab</sub> ), assuming 5 days' admission to a rehabilitation facility if it occurred, according to types of surgery                    | 5    |
| <b>Table S5.</b> Days at home up to 30 days after surgery (DAH <sub>30</sub> ), assuming 5 days' admission to a rehabilitation facility if it occurred, according to patient and perioperative characteristics | 6    |
| <b>Table S6.</b> Median (95% CI) days at home up to 30 days after surgery, assuming 5 days' admission to a rehabilitation facility if it occurred, according to postoperative complications                    | 7    |

**Table S1. Trial Data Sources**

| Trial                                                                                                                                                                | N   | Reference                               |
|----------------------------------------------------------------------------------------------------------------------------------------------------------------------|-----|-----------------------------------------|
| 1. Tranexamic acid in coronary artery surgery                                                                                                                        | 613 | N Engl J Med 2016; Oct                  |
| 2. The safety of addition of nitrous oxide to general anaesthesia in at-risk patients having major non-cardiac surgery (ENIGMA-II): a randomised, single-blind trial | 516 | Lancet 2014; 384:1446-54.               |
| 3. An enhanced recovery after surgery (ERAS) program for hip and knee arthroplasty                                                                                   | 310 | Med J Aust 2015; 202:363-8.             |
| 4. Experience of an enhanced recovery after surgery (ERAS) program for elective abdominal surgery                                                                    | 71  | Anaesth Intensive Care 2012; 40:450-9.  |
| 5. The measurement of disability-free survival after surgery                                                                                                         | 163 | Anesthesiology 2015; 122:524-36.        |
| 6. Perioperative management of patients treated with angiotensin converting enzyme inhibitors and angiotensin II receptor blockers: a quality improvement audit      | 263 | Anaesth Intensive Care 2016; 44:346-52. |
| 7. Restrictive versus liberal fluid therapy in major abdominal surgery                                                                                               | 173 | ClinicalTrials.gov NCT01424150          |

**Table S2. Third Quartile (Q3) Days at Home up to 30 Days after Surgery (DAH<sub>30</sub>) According to Patient and Perioperative Characteristics.**

| Variable               | no. (%)   | Raw Q3<br>DAH <sub>30</sub> (95% CI) | P value | Adjusted Q3<br>DAH <sub>30</sub> (95% CI)* | P-value |
|------------------------|-----------|--------------------------------------|---------|--------------------------------------------|---------|
| Patient age            |           |                                      |         |                                            |         |
| <50 years              | 220 (11)  | 27.2 ( 26.5 , 27.9 )                 | <.0001  | 26.1 ( 25.8 , 26.5 )                       | <0.0001 |
| 50-60 years            | 396 (19)  | 25.9 ( 25.5 , 26.4 )                 |         | 26.1 ( 25.9 , 26.4 )                       |         |
| 60-70 years            | 612 (29)  | 25.7 ( 25.0 , 26.4 )                 |         | 25.8 ( 25.6 , 26.1 )                       |         |
| 70-80 years            | 653 (31)  | 25.0 ( 24.6 , 25.4 )                 |         | 25.1 ( 24.8 , 25.4 )                       |         |
| ≥80 years              | 228 (11)  | 24.8 ( 24.3 , 25.3 )                 |         | 24.7 ( 24.1 , 25.4 )                       |         |
| Sex                    |           |                                      |         |                                            |         |
| Male                   | 1427 (68) | 25.1 ( 24.8 , 25.4 )                 | <.0001  | 25.6 ( 25.5 , 25.8 )                       | 0.146   |
| Female                 | 682 (32)  | 26.2 ( 25.6 , 26.8 )                 |         | 25.4 ( 25.2 , 25.7 )                       |         |
| Smoker                 |           |                                      |         |                                            |         |
| yes                    | 787 (37)  | 25.0 ( 24.8 , 25.1 )                 | <.0001  | not done                                   |         |
| no                     | 1322 (63) | 26.0 ( 25.7 , 26.2 )                 |         | not done                                   |         |
| Diabetes               |           |                                      |         |                                            |         |
| yes                    | 697 (33)  | 25.8 ( 25.1 , 26.5 )                 | >.99    | not done                                   |         |
| no                     | 1412 (67) | 25.8 ( 25.6 , 26.0 )                 |         | not done                                   |         |
| Heart failure          |           |                                      |         |                                            |         |
| yes                    | 365 (17)  | 25.9 ( 25.2 , 26.7 )                 | 0.39    | not done                                   |         |
| no                     | 1744 (83) | 25.8 ( 25.4 , 26.2 )                 |         | not done                                   |         |
| ASA physical status    |           |                                      |         |                                            |         |
| 1                      | 41 (1.9)  | 29.0 ( 28.8 , 29.3 )                 | <.0001  | 26.6 ( 26.0 , 27.2 )                       | <0.0001 |
| 2                      | 530 (25)  | 27.0 ( 26.9 , 27.1 )                 |         | 26.3 ( 26.0 , 26.6 )                       |         |
| 3                      | 1024 (51) | 25.8 ( 25.3 , 26.3 )                 |         | 25.5 ( 25.3 , 25.8 )                       |         |
| 4                      | 510 (24)  | 23.9 ( 23.8 , 24.0 )                 |         | 24.8 ( 24.5 , 25.1 )                       |         |
| Duration of Surgery, h |           |                                      |         |                                            |         |
| <2.0                   | 581 (29)  | 28.1 ( 27.7 , 28.6 )                 | <.0001  | 27.6 ( 27.3 , 28.0 )                       | <0.0001 |
| 2.0-2.99               | 412 (20)  | 26.1 ( 25.6 , 26.5 )                 |         | 25.8 ( 25.4 , 26.2 )                       |         |
| 3.0-3.99               | 551 (26)  | 24.8 ( 24.7 , 24.9 )                 |         | 24.8 ( 24.5 , 25.0 )                       |         |
| ≥4.0                   | 565 (27)  | 23.9 ( 23.8 , 23.9 )                 |         | 24.1 ( 23.8 , 24.4 )                       |         |

\*covariates including in the multivariable adjustment were: patient age, sex, American Society of Anesthesiologists (ASA) physical status and duration of surgery

**Table S3. Third Quartile (Q3) (95% CI) Days at Home up to 30 Days after Surgery According to Postoperative Complications.**

| Variable (no. [%])                  | No. with complete data | Yes                | No                 | P value <sup>a</sup> |
|-------------------------------------|------------------------|--------------------|--------------------|----------------------|
| Myocardial infarction (120 [6.5])   | 1846                   | 22.9 (22.2 - 23.5) | 25.8 (25.4 - 26.2) | <0.0001              |
| Stroke (13 [0.7])                   | 1846                   | 18.9 (10.0 - 27.8) | 25.2 (24.6 - 25.7) | 0.019                |
| Pulmonary embolism (7 [0.4])        | 1846                   | 23.1 (16.1 - 30.1) | 25.2 (24.6 - 25.7) | 0.19                 |
| Cardiac arrest (3 [0.2])            | 1846                   | 20.1 (8.0 - 32.1)  | 25.2 (24.6 - 25.7) | 0.052                |
| Surgical site infection (129 [7.0]) | 1846                   | 24.8 (23.7 - 26.0) | 25.3 (24.7 - 25.9) | <0.0001              |
| Any of the above (263 [14.2])       | 1846                   | 23.7 (23.0 - 24.5) | 25.8 (25.6 - 26.1) | <0.0001              |
| Hospital readmission (150 [7.1])    | 2090                   | 21.7 (20.8 - 22.7) | 25.9 (25.8 - 26.0) | <0.0001              |

<sup>a</sup> P values calculated using likelihood ratio test.

**Table S4. Days at Home up to 30 Days after Surgery (DAH<sub>30-rehab</sub>), Assuming 5 Days' Admission to a Rehabilitation Facility if it Occurred, According to Types of Surgery.**

| Surgery                                | No. admitted to a rehabilitation hospital (%) | Mean (95% CI) DAH <sub>30-rehab</sub> |
|----------------------------------------|-----------------------------------------------|---------------------------------------|
| Cardiac (n=679)                        | 54 (8.0)                                      | 22.8 (22.7-22.9)                      |
| Orthopaedic (n=289)                    | 122 (42)                                      | 21.9 (21.2-22.6)                      |
| Neurosurgery (n=220)                   | 9 (4.0)                                       | 22.8 (22.2-23.5)                      |
| Colorectal (n=118)                     | 8 (6.8)                                       | 24.9 (24.1-25.8)                      |
| Urology (n=315)                        | 26 (8.3)                                      | 23.8 (23.0-24.5)                      |
| Vascular (n=56)                        | 1 (1.8)                                       | 26.0 (24.4-27.6)                      |
| Ear, nose, throat (n=99)               | 17 (17)                                       | 25.8 (24.3-27.3)                      |
| Oesophagogastric/hepatobiliary (n=253) | 4 (1.6)                                       | 24.9 (23.8-26.1)                      |
| Thoracic (n=28)                        | 2 (7.1)                                       | 22.8 (17.9-27.8)                      |
| Other (n=52)                           | 2 (3.8)                                       | 28.8 (27.7-30.0)                      |

**Table S5. Days at Home up to 30 Days after Surgery (DAH<sub>30</sub>), Assuming 5 Days' Admission to a Rehabilitation Facility if it Occurred, According to Patient and Perioperative Characteristics.**

| Variable               | no. (%)   | Raw median<br>DAH <sub>30-rahab</sub> (95% CI) | P value | Adjusted median<br>DAH <sub>30-rahab</sub> (95% CI)* | P value |
|------------------------|-----------|------------------------------------------------|---------|------------------------------------------------------|---------|
| Patient age            |           |                                                | <.0001  |                                                      | <0.0001 |
| <50 years              | 220 (11)  | 24.9 (24.5 - 25.2)                             |         | 24.6 (24.2 - 25.1)                                   |         |
| 50-60 years            | 396 (19)  | 23.9 (23.5 - 24.3)                             |         | 24.5 (24.0 - 25.0)                                   |         |
| 60-70 years            | 612 (29)  | 23.8 (23.5 - 24.1)                             |         | 23.6 ( 23.2 - 24.0)                                  |         |
| 70-80 years            | 653 (31)  | 22.0 (21.5 - 22.4)                             |         | 22.5 (21.9 - 23.1)                                   |         |
| ≥80 years              | 228 (11)  | 20.9 (19.6 - 22.2)                             |         | 21.4 (20.4 - 22.4)                                   |         |
| Sex                    |           |                                                | 0.90    |                                                      | 0.0052  |
| male                   | 1427 (68) | 23.0 (22.6 - 23.4)                             |         | 23.6 (23.3 - 23.9)                                   |         |
| female                 | 682 (32)  | 23.0 (22.4 - 23.6)                             |         | 22.7 (22.2 - 23.3)                                   |         |
| Smoker                 |           |                                                | >0.99   |                                                      |         |
| yes                    | 787 (37)  | 23.0 (22.5 - 23.5)                             |         |                                                      |         |
| no                     | 1322 (63) | 23.0 (22.6 - 23.4)                             |         |                                                      |         |
| Diabetes               |           |                                                | .091    |                                                      |         |
| yes                    | 697 (33)  | 22.8 (22.6 - 23.1)                             |         |                                                      |         |
| no                     | 1412 (67) | 23.2 (22.6 - 23.8)                             |         |                                                      |         |
| Heart failure          |           |                                                | .16     |                                                      |         |
| yes                    | 365 (17)  | 22.8 (22.3 - 23.3)                             |         |                                                      |         |
| no                     | 1744 (83) | 23.1 (22.6 - 23.7)                             |         |                                                      |         |
| ASA physical status    |           |                                                |         |                                                      |         |
| 1                      | 41 (1.9)  | 27.9 (26.1 - 29.7)                             |         | 25.3 (24.3 - 26.3)                                   | <0.0001 |
| 2                      | 530 (25)  | 24.9 (24.6 - 25.1)                             | <.0001  | 24.0 (23.6 - 24.5)                                   |         |
| 3                      | 1024 (51) | 22.9 (22.7 - 23.1)                             |         | 23.1 (22.7 - 23.5)                                   |         |
| 4                      | 510 (24)  | 21.9 (21.5 - 22.3)                             |         | 22.9 (22.4 - 23.4)                                   |         |
| Duration of Surgery, h |           |                                                | <.0001  |                                                      | <0.0001 |
| <2.0                   | 581 (29)  | 25.8 (25.1 - 26.4)                             |         | 25.4 (24.9 - 26.0)                                   |         |
| 2.0-2.99               | 412 (20)  | 23.8 (23.3 - 24.3)                             |         | 23.6 (23.2 - 24.0)                                   |         |
| 3.0-3.99               | 551 (26)  | 22.8 (22.7 - 23.0)                             |         | 22.7 (22.3 - 23.1)                                   |         |
| ≥4.0                   | 565 (27)  | 21.8 (21.0 - 22.5)                             |         | 21.6 (20.9 - 22.2)                                   |         |

\*covariates including in the multivariable adjustment were: patient age, sex, American Society of Anesthesiologists (ASA) physical status and duration of surgery



**Table S6. Median (95% CI) Days at Home up to 30 Days after Surgery, Assuming 5 Days' Admission to a Rehabilitation Facility if it Occurred, According to Postoperative Complications.**

| Variable (no. [%])                  | No. with complete data | Yes                | No                              | P value <sup>a</sup> |
|-------------------------------------|------------------------|--------------------|---------------------------------|----------------------|
| Myocardial infarction (120 [6.5])   | 1846                   | 19.0 (16.6 - 21.5) | 23.1 (22.6 - 23.7)              | <0.0001              |
| Stroke (13 [0.7])                   | 1846                   | 10.1 (3.7 - 16.5)  | 23.0 (22.8 - 23.2)              | <0.0001              |
| Pulmonary embolism (7 [0.4])        | 1846                   | 17.1 (8.0 - 26.3)  | 23.0 (22.7 - 23.2)              | 0.032                |
| Cardiac arrest (3 [0.2])            | 1846                   | 15.1 (0.7 - 29.4)  | 23.0 (22.8 - 23.2)              | 0.0065               |
| Surgical site infection (129 [7.0]) | 1846                   | 20.7 (18.9 - 22.6) | 23.1 (22.6 - 23.6)              | <0.0001              |
| Any of the above (263 [14.2])       | 1846                   | 19.1 (17.5 - 20.8) | 23.7 (23.3 - 24.1)              | <0.0001              |
| Hospital readmission (150 [7.1])    | 2090                   | 17.2 (15.4 - 19.0) | 23.7 (23.3 - 24.1) <sup>b</sup> | <0.0001              |

<sup>a</sup> P values calculated using the Likelihood ratio test.

<sup>b</sup> days calculated for those without readmission after excluding postoperative deaths.

# BMJ Open

## Legend

### Validation of Days at Home as an Outcome Measure after Surgery: analysis of clinical trial data

|                                 |                                                                                                                                                                                                                                                                                                                                                                                                                                                                                                                                                                 |
|---------------------------------|-----------------------------------------------------------------------------------------------------------------------------------------------------------------------------------------------------------------------------------------------------------------------------------------------------------------------------------------------------------------------------------------------------------------------------------------------------------------------------------------------------------------------------------------------------------------|
| Journal:                        | <i>BMJ Open</i>                                                                                                                                                                                                                                                                                                                                                                                                                                                                                                                                                 |
| Manuscript ID                   | bmjopen-2017-015828.R1                                                                                                                                                                                                                                                                                                                                                                                                                                                                                                                                          |
| Article Type:                   | Research                                                                                                                                                                                                                                                                                                                                                                                                                                                                                                                                                        |
| Date Submitted by the Author:   | 27-Apr-2017                                                                                                                                                                                                                                                                                                                                                                                                                                                                                                                                                     |
| Complete List of Authors:       | Myles, Paul; Alfred Hospital and Monash University, Anaesthesia and Perioperative Medicine<br>Shulman, Mark; Alfred Hospital<br>Heritier, Stephane; School of Public Health and Preventive Medicine, Monash University, Department of Epidemiology and Preventive Medicine<br>Wallace, Sophie; Alfred Hospital<br>McIlroy, David; Alfred Hospital, Department of Anaesthesia and Perioperative Medicine<br>McCluskey, Stuart; University Health Network, Anesthesia and Pain Medicine<br>Sillar, Isabella; Alfred Hospital<br>Forbes, Andrew; Monash University |
| <b>Primary Subject Heading</b>: | Anaesthesia                                                                                                                                                                                                                                                                                                                                                                                                                                                                                                                                                     |
| Secondary Subject Heading:      | Surgery, Epidemiology                                                                                                                                                                                                                                                                                                                                                                                                                                                                                                                                           |
| Keywords:                       | STATISTICS & RESEARCH METHODS, outcome, perioperative medicine, Clinical trials < THERAPEUTICS                                                                                                                                                                                                                                                                                                                                                                                                                                                                  |
|                                 |                                                                                                                                                                                                                                                                                                                                                                                                                                                                                                                                                                 |

## Validation of Days at Home as an Outcome Measure after Surgery: analysis of clinical trial data

Paul S. Myles,<sup>1,2,3</sup> Mark A. Shulman,<sup>1</sup> Stephane Heritier,<sup>3</sup> Sophie Wallace,<sup>1</sup> David R. McIlroy,<sup>1,2</sup> Stuart McCluskey,<sup>4</sup> Isabella Sillar,<sup>2</sup> Andrew Forbes<sup>3</sup>

---

<sup>1</sup>Department of Anaesthesia and Perioperative Medicine, Alfred Hospital, Melbourne, Australia

<sup>2</sup>Department of Anaesthesia and Perioperative Medicine, Monash University, Melbourne, Australia

<sup>3</sup>Department of Epidemiology and Preventive Medicine, Monash University, Melbourne, Australia

<sup>4</sup>Toronto General Hospital and University of Toronto, Toronto, ON, Canada

### **ADDRESS FOR CORRESPONDENCE**

Paul S. Myles  
Professor and Chair  
Department of Anaesthesia and Perioperative Medicine  
Alfred Hospital, Commercial Road, Melbourne, Victoria, 3004, Australia

Email: p.myles@alfred.org.au

**Word count:** 3050

*The Corresponding Author has the right to grant on behalf of all authors and does grant on behalf of all authors, a worldwide licence to the Publishers and its licensees in perpetuity, in all forms, formats and media (whether known now or created in the future), to i) publish, reproduce, distribute, display and store the Contribution, ii) translate the Contribution into other languages, create adaptations, reprints, include within collections and create summaries, extracts and/or, abstracts of the Contribution, iii) create any other derivative work(s) based on the Contribution, iv) to exploit all subsidiary rights in the Contribution, v) the inclusion of electronic links from the Contribution to third party material where-ever it may be located; and, vi) licence any third party to do any or all of the above.*

Competing interest statement - All authors declare that the answer to the questions on the competing interest form are all No and therefore have nothing to declare.

Funding - The Australian and New Zealand College of Anaesthetists; and the Australian National Health and Medical Research Council Practitioner Fellowship (Prof Myles).

## ABSTRACT

**OBJECTIVE** To evaluate “days at home up to 30 days after surgery” (DAH<sub>30</sub>) as a patient-centred outcome measure.

**DESIGN** Prospective cohort study.

**DATA SOURCE** Using clinical trial data (7 trials, 2109 patients) we calculated DAH<sub>30</sub> from length of stay, re-admission, discharge destination, and death up to 30 days after surgery.

**MAIN OUTCOME** The association between DAH<sub>30</sub> and serious complications after surgery.

**RESULTS** One or more complications occurred in 263 of 1846 (14.2%) patients, including 19 (1.0%) deaths within 30 days of surgery; 245 (11.6%) patients were discharged to a rehabilitation facility and 150 (7.1%) were readmitted to hospital within 30 days of surgery. The median DAH<sub>30</sub> was significantly less in older patients ( $P < 0.001$ ), those with poorer physical functioning ( $P < 0.001$ ), and in those undergoing longer operations ( $P < 0.001$ ). Patients with serious complications had less days at home than patients without serious complications (20.5 [95% CI, 19.1 to 21.9] vs 23.9 [95% CI, 23.8 to 23.9]  $P < 0.001$ ), and had higher rates of readmission (16.0% vs. 5.9%;  $P < 0.001$ ). After adjusting for patient age, sex, physical status and duration of surgery, the occurrence of postoperative complications was associated with fewer days at home after surgery (difference 3.0 [95% CI, 2.1 to 4.0] days;  $P < 0.001$ ).

**CONCLUSIONS** DAH<sub>30</sub> has construct validity and is a readily-obtainable generic patient-centred outcome measure. It is a pragmatic outcome measure for perioperative clinical trials.

### Strengths and limitations of the study

- This study integrates length of stay, re-admission, discharge destination, and early deaths after surgery into a single outcome metric, “days at home up to 30 days after surgery” (DAH<sub>30</sub>)
- DAH<sub>30</sub> is an ideal, patient-centred outcome measure for perioperative clinical trials and quality assurance activities
- Accurate calculation of DAH<sub>30</sub> requires knowledge of post-discharge location (home or nursing facility) and any re-admissions at the index or other hospitals
- Because early deaths heavily influence the DAH<sub>30</sub> metric, this information should be additionally reported if, say, the incidence exceeds 10%

## Introduction

Surgery and other interventional procedures are intended to relieve symptoms and in many cases prolong life. But surgery is not risk-free; perioperative complications can impair patient recovery resulting in prolonged hospitalization, short or longer term disability, and sometimes poor survival. A wide variety of outcome measures have been used to quantify each of these aspects of the postoperative experience but few provide a broad, patient-centred perspective of effective and efficient care;<sup>1</sup> these are needed to better inform the current shift towards value-based healthcare.<sup>2,3</sup>

Patient-centred care requires clinicians to consider outcomes that matter most to patients. That is, the patient's experience of their illness, quality of life, and functioning; their values, preferences and goals for health care.<sup>4</sup> Loss of the ability to live independently is a major concern for the elderly;<sup>5,6</sup> it is clearly a patient-centred outcome, and has been associated with postoperative readmissions and death after hospital discharge.<sup>5</sup>

Specific peri-procedural complications such as surgical site infection, respiratory failure, delirium, and myocardial infarction are clearly important to patients and physicians alike, but reliable and consistent detection is problematic. In any case such information is an incomplete description of the overall success of surgery and other perioperative care, and does not describe the impact of such complications on functioning and need for institutionalization. Similar challenges occur when nominating endpoints in clinical trials, including a lack of standardisation,<sup>7</sup> need for adjudication, and uncertainty about the overall health impact of each endpoint on a patient's recovery. There is a growing acceptance that

1  
2  
3 outcome measures used in clinical trials should be determined in partnership by patients  
4  
5 and physician-researchers, aiming to identify outcomes that are important to patients.<sup>8</sup>  
6  
7

8  
9  
10 “Days alive and out of hospital” has been shown to be a readily quantifiable and patient-  
11  
12 centred outcome measure in some chronic cardiovascular conditions such as heart failure  
13  
14 and atrial fibrillation,<sup>9-11</sup> and in geriatric medicine,<sup>12</sup> but it has not been used as an outcome  
15  
16 measure in perioperative trials. Home discharge has been proposed as a proxy for a  
17  
18 patient’s recovery after surgery,<sup>13</sup> and is estimated when using the American College of  
19  
20 Surgeons’ Surgical Risk Calculator,<sup>14</sup> but this does not account for readmissions or early  
21  
22 deaths, although the latter collects and reports some of this information.<sup>15</sup>  
23  
24  
25  
26  
27

28  
29 Our own work and that of others have shown that early return home after surgery,<sup>6 16-18</sup> and  
30  
31 medical illnesses such as stroke,<sup>19 20</sup> is highly valued by patients but could be undermined if  
32  
33 the patient were to be transferred to another type of nursing facility. A more favourable  
34  
35 perioperative outcome measure should account for both the initial hospital stay associated  
36  
37 with the index surgery, rehospitalisation due to post-discharge complications, discharge to  
38  
39 institutional care, and early deaths.  
40  
41  
42  
43  
44

45  
46 We thus chose to evaluate the utility of “days (alive and) at home” within 30 days of surgery  
47  
48 (DAH<sub>30</sub>) in the surgical/perioperative setting as a patient-centred outcome measure for  
49  
50 perioperative clinical trials and quality improvement activities. Our hypothesis was that  
51  
52 DAH<sub>30</sub> would be lower in higher risk patients, those undergoing more extensive surgery, and  
53  
54 in those with complications after surgery (i.e. it has construct validity).  
55  
56  
57  
58  
59  
60

## Methods

This manuscript was written in adherence to the Strengthening The Reporting of Observational Studies in Epidemiology (STROBE) statement.<sup>21</sup>

### Study Design and Data Sources

Data were obtained from each of seven recently completed clinical trials that prospectively enrolled patients undergoing various types of elective and emergency surgery at the Alfred Hospital in Melbourne, Australia. The cohort consisted of four multicentre randomised trials and three before-and-after studies (see Table S1 in the Supplementary Appendix).<sup>22-29</sup> For each trial we collected a comparable set of patient demographic and perioperative characteristics, and clinical outcome measures, including complete hospital discharge, discharge destination (home, rehabilitation facility, nursing home) and re-admission data. All but one study<sup>28</sup> prospectively recorded re-admission data; for the latter study we could obtain this information retrospectively from our hospital information system. Both the present study and each of the original trials received institutional ethics committee approval.

### Patients

Patients 18 years and older undergoing an elective or non-elective inpatient operation enrolled in one of the aforementioned trials were included. Study inclusion criteria were established for the original studies and typically identified those at increased risk of postoperative complications. In all cases patients provided informed consent before enrolment in the original trials.



### *Patient involvement*

Hospital patients have previously indicated the importance of returning home after hospitalisation for medical or surgical conditions,<sup>6 16-20</sup> but we did not involve patients or their carers in the design or conduct of this study.

### **Risk Factors and Outcomes**

Perioperative data included patient demographics, comorbidity, functional status, type and duration of surgery, hospital length of stay, hospital readmission(s), and in all but one study<sup>28</sup> we prospectively collected selected complications at 30 days after surgery: wound infection, myocardial infarction, stroke, pulmonary embolism, cardiac arrest, and death.

Hospital discharge data were used to calculate hospital length of stay. Whether the patient was discharged from hospital to their home or to a nursing facility was obtained from the electronic medical record, but for those admitted to a rehabilitation facility we were unable to ascertain the number of days admitted before eventual discharge home. For those readmitted to hospital we combined the original length of stay with subsequent hospital stay(s) to calculate total length of stay within 30 days postoperatively.

DAH<sub>30</sub> was calculated using mortality and hospitalisation data from the date of the index surgery (Day 0). For example, if a patient died on day 2 after their surgery, they were assigned 0 DAH<sub>30</sub>, if a patient was discharged from hospital on Day 6 after surgery but was subsequently readmitted for 4 days before their second hospital discharge, then they were assigned 20 DAH<sub>30</sub>. If a patient died within 30 days of surgery, irrespective of whether they

1  
2  
3 had spent some time at home, DAH<sub>30</sub> was scored as zero (0). Further explanation is provided  
4  
5 in the Supplementary Appendix.  
6  
7

8  
9  
10 Patients are commonly admitted to a post-acute hospital rehabilitation centre after lower  
11  
12 limb arthroplasty and cardiac surgery in our setting; some frail and elderly patients are also  
13  
14 transferred for ongoing convalescence. We were unable to reliably collect secondary length  
15  
16 of stay for rehabilitation facilities - we thus did two secondary analysis, assuming the length  
17  
18 of stay in a rehabilitation facility was 5 or 14 extra days. That is, DAH<sub>30-rehab5</sub> was calculated  
19  
20 as DAH<sub>30-5</sub>, and DAH<sub>30-rehab14</sub> was calculated as DAH<sub>30-14</sub>, in secondary analyses.  
21  
22  
23

24  
25  
26 For the multicentre trials,<sup>22-24</sup> a 12-lead electrocardiograph was recorded preoperatively and  
27  
28 on day 1 and 3 after surgery. Blood for troponin (or if unavailable, creatine kinase-  
29  
30 myocardial band) measurement was collected at 6 to 12 hours after surgery and on the first  
31  
32 three postoperative days. In all trials laboratory tests were otherwise ordered if clinically  
33  
34 indicated. Each complication was defined within the original study protocol and in all cases a  
35  
36 consistent definition was used. In brief, surgical site infection was confirmed if associated  
37  
38 with purulent discharge, with or without a positive microbial culture; or pathogenic  
39  
40 organisms isolated from aseptically obtained microbial culture,<sup>30</sup> although the most recent  
41  
42 trial<sup>27</sup> included documentation of a physician's diagnosis in this definition.<sup>31</sup> Pneumonia was  
43  
44 confirmed by a new pulmonary infiltrate reported by chest x-ray or computerized tomo-  
45  
46 graphy, in association with at least one of: temperature >38°C, white cell count >12,000/ml,  
47  
48 or positive sputum culture that was not heavily contaminated with oral flora or that  
49  
50 corresponded with positive blood cultures. Myocardial infarction was defined according to  
51  
52 the third universal definition,<sup>32</sup> requiring elevated cardiac biomarker plus at least one of the  
53  
54  
55  
56  
57  
58  
59  
60

1  
2  
3 following: (i) ischaemic symptoms, (ii) pathological Q waves, (iii) electrocardiographic  
4  
5 changes indicative of ischemia, (iv) coronary artery intervention or (v) new wall motion  
6  
7 abnormality on echocardiography or scanning; or autopsy finding of myocardial infarction.  
8  
9  
10 The threshold for significant elevated troponin was the hospital laboratory's 99th percentile  
11  
12 of a normal reference population (upper reference limit), according to recent  
13  
14 recommendations.<sup>33</sup> Stroke was confirmed if a new neurological deficit persisting for at  
15  
16 least 24 hours, verified by neurologist assessment and/or computerized tomography or  
17  
18 magnetic resonance imaging.  
19  
20  
21  
22  
23

### 24 **Statistical Analysis**<sup>34 35</sup>

25  
26 Data were first merged and checked for inconsistencies. Patient age was grouped into 10-  
27  
28 year categories, and hourly cut-points for duration of surgery (2, 3, and 4 h) were created to  
29  
30 generate approximately similar group sizes and facilitate clinical interpretation. DAH<sub>30</sub> was  
31  
32 analysed using quantile regression.<sup>36</sup> This approach, well known in econometrics where it  
33  
34 was initially introduced, allows the modelling of any quantile of a continuous endpoint, here  
35  
36 DAH<sub>30</sub>, as a linear combination of the covariates. As DAH<sub>30</sub> is left skewed with a spike at  
37  
38 zero, it is more relevant to model the median (or alternatively, the 75<sup>th</sup> percentile) that is  
39  
40 closer to the major distribution mode and directly interpretable. The choice of the  
41  
42 quantile(s) to be analysed can be prespecified or a range of values selected for their  
43  
44 meaningfulness or exploratory purposes. Here the range 50<sup>th</sup>-75<sup>th</sup> percentile was deemed  
45  
46 relevant. No assumption on the true distribution of the endpoint is required. The asymptotic  
47  
48 distribution of the parameter estimates can be derived but depends on some unknown  
49  
50 density estimate. In general, resampling methods are recommended to obtain confidence  
51  
52 intervals (CIs).<sup>37 38</sup> Raw and adjusted medians and their 95% CIs obtained by bootstrapping  
53  
54  
55  
56  
57  
58  
59  
60

1  
2  
3 as implemented in Stata with 1000 replicates were reported for key predictors. The adjusted  
4  
5 models included age by 10-year categories, sex, American Society of Anesthesiologists (ASA)  
6  
7 physical status score, surgery time (< 2h, 2.0 - 2.99, 3.0 -3.99,  $\geq 4.0$ ). A goodness of fit test<sup>39</sup>  
8  
9 comparing this model to the full model including the same predictors plus smoking, heart  
10  
11 failure and diabetes was not any better (P=0.36). A global test of effect of any key predictor  
12  
13 was carried out using a quasi-likelihood ratio test.<sup>39</sup> Quantile regression was also used to  
14  
15 test median differences between those with and without complications, and by  
16  
17 postoperative complications. Supplementary analyses were done for the 75<sup>th</sup> percentile  
18  
19 (Q3). All analyses were done using Stata 14.0 except the quasi-likelihood ratio test analysis  
20  
21 that is only available in SAS. All tests were two-sided and performed at level  $\alpha=0.05$ ; no  
22  
23 correction was made for multiple comparisons.  
24  
25  
26  
27  
28  
29  
30  
31  
32

### 33 Results

34  
35  
36 A total of 2109 eligible patients 18 years and older were enrolled into clinical trials and  
37  
38 underwent inpatient operations at the Alfred Hospital between March 2006 and September  
39  
40 2016. The number of patients enrolled in each of the trials is detailed in the Supplement  
41  
42 (Supplementary Table 1). The cohort included 1427 male patients (67.7%) with a mean (SD)  
43  
44 age of 65 (12) years who underwent a range of inpatient operations (Table 1). Most  
45  
46 operations were cardiac surgical procedures (679 [32.2%]), followed by general (489  
47  
48 [23.2%]), urologic (315 [14.9%]), and neurosurgical procedures (220 [10.4%]).  
49  
50  
51  
52  
53  
54

55 There was a bimodal, skewed distribution of DAH<sub>30</sub> (Figure 1). The spike at zero consisted of  
56  
57 19 patients (1.0%) that died, and 40 patients remaining in hospital at least 30 days after  
58  
59  
60

1  
2  
3 surgery. DAH<sub>30</sub> and rates of admission to a rehabilitation centre varied according to type of  
4  
5 surgery (Table 2).  
6  
7  
8  
9

10  
11 One or more complications occurred in 263 (14.2%) patients. Overall, 245 (11.6%) patients  
12  
13 were admitted to a rehabilitation facility and 150 (7.1%) were readmitted within 30 days of  
14  
15 surgery. The median DAH<sub>30</sub> was 23.7 (95% CI, 23.5 to 24.0), but this varied according to type  
16  
17 of surgery (Table 1).  
18  
19  
20  
21  
22

23  
24 The median DAH<sub>30</sub> was significantly less in older patients, current smokers, diabetics, those  
25  
26 with poorer physical functioning, and undergoing longer operations (Table 2). These  
27  
28 associations remained after adjustment for all of these covariates and patient sex (Table 2).  
29  
30 The individual complications of myocardial infarction, stroke, pulmonary embolism, and  
31  
32 surgical site infection were each associated with shorter DAH<sub>30</sub> (Table 3) in a raw analysis.  
33  
34 Hospital readmission was also a factor, decreasing median DAH<sub>30</sub> when compared with  
35  
36 those not readmitted to hospital, 17.9 (95% CI, 16.3 to 19.5) vs 23.9 (95% CI, 23.8 to 23.9),  
37  
38 respectively (P<0.0001).  
39  
40  
41  
42  
43  
44

45  
46 After adjusting for patient age, sex, ASA physical status and duration of surgery, the  
47  
48 occurrence of any postoperative complication was associated with fewer days at home after  
49  
50 surgery (difference 3.0 [95% CI, 2.1 to 4.0] days; P<0.0001).  
51  
52  
53

#### 54 **Supplementary Analyses**

55  
56  
57  
58  
59  
60

1  
2  
3 The above findings were consistent when analysing the 3<sup>rd</sup> quartile distributions and  
4 differences (Tables S2-S4 in the Supplementary Appendix), and after accounting for the  
5 additional loss of days at home because of admission to a rehabilitation centre (Tables S5 –  
6 S9 in the Supplementary Appendix).  
7  
8  
9  
10  
11  
12

### 13 14 15 **Discussion**

16  
17 We found that DAH<sub>30</sub> has construct validity and is a readily-obtainable patient-centred  
18 outcome measure that could be used to better inform patients and physicians when  
19 planning surgery. Unlike previous related measures, DAH<sub>30</sub> accounts for each of delayed  
20 hospital discharge because of postoperative complications, discharge to a rehabilitation  
21 centre or other post-acute care nursing facility, rehospitalisations, and postoperative  
22 deaths. It thus captures much of the surgical experience, integrating efficacy, quality and  
23 safety, and thus reflecting value-based care. It can also be risk-adjusted for bench-marking  
24 purposes. DAH<sub>30</sub> will be maximized when patients recover free of complications after  
25 surgery, with optimal comfort and functioning - aligning with patient values and  
26 preferences, and goals for health care.<sup>4</sup>  
27  
28  
29  
30  
31  
32  
33  
34  
35  
36  
37  
38  
39  
40  
41  
42

43 Although concerns are frequently raised about the usefulness of hospital length of stay as  
44 an outcome measure after surgery, largely because of social factors and reluctance to  
45 discharge on weekends, it mostly adds variance (background noise) in clinical trials and is  
46 not biased. Very few hospitals have the luxury of extending a patient's stay in hospital for  
47 non-clinical reasons. Hospital stay is a reasonable surrogate for quality and speed of  
48 recovery after surgery, and it has marked resource/cost implications. Most patients want to  
49 go home as soon as possible – it is a desired outcome in and of itself.  
50  
51  
52  
53  
54  
55  
56  
57  
58  
59  
60

1  
2  
3  
4  
5 The US has a triple aim of improving the healthcare system: improving the patient  
6 experience of care, improving the health of populations, and reducing per capita costs of  
7 healthcare.<sup>40</sup> DAH<sub>30</sub> seems to be useful, generic metric in this regard.<sup>41</sup> DAH<sub>30</sub> is a measure  
8 of the overall burden of care, both in hospital and post-discharge. The perceived success of  
9 a hospital discharge plan as perceived by the patient and their principal carer depends on  
10 clear communication and meeting expectations.<sup>42</sup> DAH<sub>30</sub> offers transparency and  
11 opportunities for benchmarking performance, both of which are important components of  
12 quality improvement.<sup>13</sup> It may influence alternative payment contracts for hospitals.  
13  
14  
15  
16  
17  
18  
19  
20  
21  
22  
23

24  
25  
26 Postoperative complications add to hospital costs and increase length of stay.<sup>43</sup> Higher  
27 episode payments at “lower-quality” hospitals have been attributed to higher rates of  
28 complications, 30-day readmissions, and post-discharge ancillary care.<sup>43</sup> Serious  
29 postoperative complications are both strongly associated with readmission,<sup>5 17</sup> increasing  
30 the risk by 6.7-fold, and loss of independence.<sup>5</sup> Readmission is a frequent, costly, and  
31 sometimes life-threatening event that is associated with gaps in follow-up care.<sup>15 17 44</sup>  
32  
33 Readmission after surgery is thus an established quality indicator. Trends in readmissions  
34 suggest that US hospitals are responding to incentives to reduce readmissions under the  
35 Affordable Care Act.<sup>45 46</sup> Hospital readmission rates are not highly correlated with mortality  
36 rates,<sup>47</sup> so they offer an independent and more sensitive measure of quality. Even though  
37 some readmissions are due to chronic medical conditions,<sup>44</sup> optimal perioperative care  
38 should keep these to a minimum and such improvements should be reflected in more  
39  
40  
41  
42  
43  
44  
45  
46  
47  
48  
49  
50  
51  
52  
53  
54  
55 DAH<sub>30</sub>.

1  
2  
3 Enhanced recovery after surgery programs are designed to reduce complications and  
4  
5 shorten length of stay. But this sometimes comes at the cost of increased hospital re-  
6  
7 admissions.<sup>48 49</sup> The measurement and reporting of DAH<sub>30</sub> would identify this and hopefully  
8  
9 encourage further quality improvement. Planned discharge to a rehabilitation facility  
10  
11 sometimes forms part of an enhanced recovery pathway, and in any case may not be seen  
12  
13 by the patient or their family as indicating a poor outcome. Therefore, calculation of DAH<sub>30</sub>  
14  
15 in some studies could incorporate days spent in a rehabilitation facility as equivalent to  
16  
17 being home. In contrast, unplanned admission to a rehabilitation facility would indicate  
18  
19 poor care or adverse outcome, and this should be retained in the calculation of DAH<sub>30</sub>. Care  
20  
21 should be taken to avoid missing out-of-network hospitalizations, particularly if relying on  
22  
23 hospital system electronic medical records. The latter will otherwise enhance the efficiency  
24  
25 of data collection.  
26  
27  
28  
29  
30  
31  
32

33 Composite endpoints used in perioperative trials are often flawed,<sup>50-52</sup> typically used to  
34  
35 increase the number of events in order to enhance statistical power. DAH<sub>30</sub>, as a numerical  
36  
37 patient-centred measure, provides more statistical power, can be reliably measured and has  
38  
39 direct patient-centredness. Although some postoperative complications and poor survival  
40  
41 can manifest many months after surgery in those recovering from major surgery or critical  
42  
43 illness,<sup>29 53 54</sup> extending measurement out to 90 days after surgery (i.e. DAH<sub>90</sub>) may not  
44  
45 necessarily provide new or different information because the extra burden and costs of  
46  
47 further data collection may outweigh the benefits of the extra information obtained. In  
48  
49 addition, disease progression or other aspects of life may confound outcome evaluation of  
50  
51 perioperative care.  
52  
53  
54  
55  
56  
57  
58  
59  
60



1  
2  
3 Our study has several limitations. First, this was a single-centre study of clinical trial data  
4 collected for other purposes. Second, postoperative in-hospital deaths have a major  
5 influence on the calculation of DAH<sub>30</sub>; this is arguably appropriate because perioperative  
6 studies should weight this as the most extreme adverse outcome. More sophisticated  
7 modelling could jointly model the risk of death and DAH<sub>30</sub> in those discharged alive, and such  
8 modelling would be particularly important if the in-hospital mortality rate is moderate or greater.  
9  
10 Third, different health care settings can be expected to have varied casemix and hospital  
11 discharge processes, and hospital discharge may be delayed because of social and process  
12 issues unrelated to complications or quality of care. DAH<sub>30</sub> should therefore be risk-  
13 adjusted.<sup>55</sup> Fourth, DAH<sub>30</sub> doesn't provide specific information on which aspects of in-  
14 hospital or post-discharge management influences where patients reside after  
15 hospitalization, or the post-discharge use and effectiveness of family physician or other  
16 health care resources. Fifth, DAH<sub>30</sub> is an overall measure of recovery profile and does not  
17 inform us about specific complications, level of functioning or wellbeing. Such aspects  
18 should also be included when conducting outcome studies. Sixth, obtaining accurate data on  
19 days spent in a rehabilitation facility relies on further follow-up or accurate electronic  
20 records. Future studies using DAH<sub>30</sub> should prospectively plan to reliably obtain such data.  
21  
22  
23  
24  
25  
26  
27  
28  
29  
30  
31  
32  
33  
34  
35  
36  
37  
38  
39  
40  
41  
42  
43  
44

## 45 CONCLUSIONS

46 DAH<sub>30</sub> has construct validity and is a readily-obtainable, generic, patient-centred outcome  
47 measure that can better inform patients and physicians when planning surgery. It is a  
48 suitable outcome measure for both quality improvement and perioperative clinical trials.  
49  
50 DAH<sub>30</sub> accounts for prolonged hospital stay, discharge to any post-acute care nursing facility,  
51  
52  
53  
54  
55  
56  
57  
58  
59  
60

1  
2  
3 rehospitalizations, and early deaths. It thus captures much of the patient-centred  
4  
5  
6 experience, and will be maximal when effective and efficient care is achieved.  
7  
8  
9  
10  
11  
12  
13  
14  
15  
16  
17  
18  
19  
20  
21  
22  
23  
24  
25  
26  
27  
28  
29  
30  
31  
32  
33  
34  
35  
36  
37  
38  
39  
40  
41  
42  
43  
44  
45  
46  
47  
48  
49  
50  
51  
52  
53  
54  
55  
56  
57  
58  
59  
60

1  
2  
3 **Contributor statement:** PM designed the study, oversaw the ethics application, devised the  
4  
5 statistical analysis plan, and drafted and revised the paper. He is guarantor. MS provided  
6  
7 intellectual input into the study design, and drafted and revised the paper. SH analysed the  
8  
9 data and drafted and revised the paper. SW prepared the ethics application, monitored the  
10  
11 data entry and checking, and drafted and revised the paper. DM provided intellectual input  
12  
13 into the study design, and drafted and revised the paper. SM provided intellectual input into  
14  
15 the study design, and drafted and revised the paper. IS retrieved and entered all study data,  
16  
17 and revised the paper. AF contributed to the statistical analysis, and drafted and revised the  
18  
19 paper.  
20  
21  
22  
23  
24  
25  
26

27 **Transparency declaration:** The lead author\* affirms that this manuscript is an honest,  
28  
29 accurate, and transparent account of the study being reported; that no important aspects of  
30  
31 the study have been omitted; and that any discrepancies from the study as planned have  
32  
33 been explained.  
34  
35  
36  
37  
38  
39

40 **Acknowledgment:** The authors would like to thank the study participants for their interest  
41  
42 and preparedness to consent to the original trials. PM is supported in part by Practitioner  
43  
44 Fellowships from the Australian National Health and Medical Research Council (NHMRC).  
45  
46  
47  
48  
49

50 **Funding:** This work was supported by the Australian NHMRC, the New Zealand Health  
51  
52 Research Council, and the Australian and New Zealand College of Anaesthetists, and  
53  
54 Monash University (Melbourne, Australia).  
55  
56  
57  
58  
59  
60

1  
2  
3  
4  
5 **Additional data:** No additional data available.  
6  
7

8 **Competing interests:** None of the authors have any conflicts of interest  
9

10 **Ethics approval:** This trial has been approved by the Ethics Committees of Alfred Health,  
11  
12 Melbourne, Australia.  
13  
14  
15  
16  
17  
18  
19  
20  
21  
22  
23  
24  
25  
26  
27  
28  
29  
30  
31  
32  
33  
34  
35  
36  
37  
38  
39  
40  
41  
42  
43  
44  
45  
46  
47  
48  
49  
50  
51  
52  
53  
54  
55  
56  
57  
58  
59  
60

## References

1. Austin JM, McGlynn EA, Pronovost PJ. Fostering Transparency in Outcomes, Quality, Safety, and Costs. *Jama* 2016 doi: 10.1001/jama.2016.14039 [published Online First: 2016/09/27]
2. Lynn J, McKethan A, Jha AK. Value-Based Payments Require Valuing What Matters to Patients. *JAMA* 2015;314(14):1445-6. doi: 10.1001/jama.2015.8909
3. Porter ME. What is value in health care? *N Engl J Med* 2010;363(26):2477-81. doi: 10.1056/NEJMp1011024 [published Online First: 2010/12/15]
4. Lavalley DC, Chenok KE, Love RM, et al. Incorporating Patient-Reported Outcomes Into Health Care To Engage Patients And Enhance Care. *Health Aff (Millwood)* 2016;35(4):575-82. doi: 10.1377/hlthaff.2015.1362 [published Online First: 2016/04/06]
5. Berian JR, Mohanty S, Ko CY, et al. Association of Loss of Independence With Readmission and Death After Discharge in Older Patients After Surgical Procedures. *JAMA Surg* 2016;151(9):e161689. doi: 10.1001/jamasurg.2016.1689 [published Online First: 2016/07/14]
6. Fried TR, Bradley EH, Towle VR, et al. Understanding the treatment preferences of seriously ill patients. *N Engl J Med* 2002;346(14):1061-6. doi: 10.1056/NEJMsa012528
7. Goldfarb M, Drudi L, Almohammadi M, et al. Outcome Reporting in Cardiac Surgery Trials: Systematic Review and Critical Appraisal. *J Am Heart Assoc* 2015;4(8):e002204. doi: 10.1161/jaha.115.002204 [published Online First: 2015/08/19]
8. Chalmers I, Clarke M. Outcomes that matter to patients in tombstone trials. *Lancet* 2001;358(9293):1649. doi: S0140673601066892 [pii] [published Online First: 2001/11/22]
9. Ariti CA, Cleland JG, Pocock SJ, et al. Days alive and out of hospital and the patient journey in patients with heart failure: Insights from the candesartan in heart failure: assessment of reduction in mortality and morbidity (CHARM) program. *Am Heart J* 2011;162(5):900-6. doi: 10.1016/j.ahj.2011.08.003
10. Wasywich CA, Gamble GD, Whalley GA, et al. Understanding changing patterns of survival and hospitalization for heart failure over two decades in New Zealand: utility of 'days alive and out of hospital' from epidemiological data. *Eur J Heart Fail* 2010;12(5):462-8. doi: 10.1093/eurjhf/hfq027
11. Xian Y, Wu J, O'Brien EC, et al. Real world effectiveness of warfarin among ischemic stroke patients with atrial fibrillation: observational analysis from Patient-Centered Research into Outcomes Stroke Patients Prefer and Effectiveness Research (PROSPER) study. *BMJ* 2015;351:h3786. doi: 10.1136/bmj.h3786
12. Ellis G, Whitehead MA, Robinson D, et al. Comprehensive geriatric assessment for older adults admitted to hospital: meta-analysis of randomised controlled trials. *Bmj* 2011;343:d6553. doi: 10.1136/bmj.d6553 [published Online First: 2011/10/29]
13. Hyder JA, Hirschberg RE, Nguyen LL. Home discharge as a performance metric for surgery. *JAMA Surg* 2015;150(2):96-7. doi: 10.1001/jamasurg.2014.1725 [published Online First: 2014/12/05]
14. Hyder JA, Wakeam E, Habermann EB, et al. Derivation and validation of a simple calculator to predict home discharge after surgery. *J Am Coll Surg* 2014;218(2):226-36. doi: 10.1016/j.jamcollsurg.2013.11.002
15. Merkow RP, Ju MH, Chung JW, et al. Underlying reasons associated with hospital readmission following surgery in the United States. *JAMA* 2015;313(5):483-95. doi: 10.1001/jama.2014.18614
16. Boney O, Bell M, Bell N, et al. Identifying research priorities in anaesthesia and perioperative care: final report of the joint National Institute of Academic Anaesthesia/James Lind Alliance Research Priority Setting Partnership. *BMJ Open* 2015;5(12):e010006. doi: 10.1136/bmjopen-2015-010006 [published Online First: 2015/12/18]
17. Hinami K, Bilimoria KY, Kallas PG, et al. Patient experiences after hospitalizations for elective surgery. *Am J Surg* 2014;207(6):855-62. doi: 10.1016/j.amjsurg.2013.04.014

- 1  
2  
3 18. Burns KE, Jacob SK, Aguirre V, et al. Stakeholder Engagement in Trial Design: Survey of Visitors to  
4 Critically Ill Patients Regarding Preferences for Outcomes and Treatment Options during  
5 Weaning from Mechanical Ventilation. *Ann Am Thorac Soc* 2016;13(11):1962-68. doi:  
6 10.1513/AnnalsATS.201606-445OC [published Online First: 2016/09/07]  
7  
8 19. Hannah D, Lindholm B, Maisch L. Certain uncertainty: life after stroke from the patient's  
9 perspective. *Circ Cardiovasc Qual Outcomes* 2014;7(6):968-9. doi:  
10 10.1161/CIRCOUTCOMES.114.001315  
11  
12 20. Xian Y, O'Brien EC, Fonarow GC, et al. Patient-Centered Research into Outcomes Stroke Patients  
13 Prefer and Effectiveness Research: Implementing the patient-driven research paradigm to  
14 aid decision making in stroke care. *Am Heart J* 2015;170(1):36-45, 45.e1-11. doi:  
15 10.1016/j.ahj.2015.04.008 [published Online First: 2015/06/22]  
16  
17 21. von Elm E, Altman DG, Egger M, et al. The Strengthening the Reporting of Observational Studies  
18 in Epidemiology (STROBE) statement: guidelines for reporting observational studies. *Lancet*  
19 2007;370(9596):1453-7. doi: 10.1016/S0140-6736(07)61602-X  
20  
21 22. Myles PS, Leslie K, Chan MT, et al. The safety of addition of nitrous oxide to general anaesthesia  
22 in at-risk patients having major non-cardiac surgery (ENIGMA-II): a randomised, single-blind  
23 trial. *Lancet* 2014;384(9952):1446-54. doi: 10.1016/s0140-6736(14)60893-x [published  
24 Online First: 2014/08/22]  
25  
26 23. Myles PS, Smith JA, Forbes A, et al. Stopping vs. Continuing Aspirin before Coronary Artery  
27 Surgery. *N Engl J Med* 2016;374(8):728-37. doi: 10.1056/NEJMoa1507688  
28  
29 24. Myles PS, Smith JA, Forbes A, et al. Tranexamic acid in coronary artery surgery. *N Engl J Med*  
30 2017;2017(376):136-48.  
31  
32 25. Thompson EG, Gower ST, Beilby DS, et al. Enhanced recovery after surgery program for elective  
33 abdominal surgery at three Victorian hospitals. *Anaesth Intensive Care* 2012;40(3):450-9.  
34 [published Online First: 2012/05/15]  
35  
36 26. Christelis N, Wallace S, Sage CE, et al. An enhanced recovery after surgery program for hip and  
37 knee arthroplasty. *Med J Aust* 2015;202(7):363-8.  
38  
39 27. Glassford NJ, Myles P, Bellomo R. The Australian approach to peri-operative fluid balance. *Curr*  
40 *Opin Anaesthesiol* 2012;25(1):102-10. doi: 10.1097/ACO.0b013e32834decd7 [published  
41 Online First: 2011/11/25]  
42  
43 28. Vijay A, Grover A, Coulson T, et al. Perioperative management of patients treated with  
44 angiotensin-converting enzyme inhibitors and angiotensin II receptor blockers. *Anaesth*  
45 *Intensive Care* 2016;in press  
46  
47 29. Shulman MA, Myles PS, Chan MT, et al. Measurement of disability-free survival after surgery.  
48 *Anesthesiology* 2015;122(3):524-36. doi: 10.1097/ALN.0000000000000586  
49  
50 30. Mangram A, Horan T, Pearson M, et al. Guideline for prevention of surgical site infection, 1999.  
51 *Infection Control and Hospital Epidemiology* 1999;20:247-77.  
52  
53 31. Degnim AC, Throckmorton AD, Boostrom SY, et al. Surgical site infection after breast surgery:  
54 impact of 2010 CDC reporting guidelines. *Ann Surg Oncol* 2012;19(13):4099-103. doi:  
55 10.1245/s10434-012-2448-6  
56  
57 32. Thygesen K, Alpert JS, Jaffe AS, et al. Third universal definition of myocardial infarction.  
58 *Circulation* 2012;126(16):2020-35. doi: 10.1161/CIR.0b013e31826e1058  
59  
60 CIR.0b013e31826e1058 [pii] [published Online First: 2012/08/28]  
33. Leonardi S, Armstrong PW, Schulte PJ, et al. Implementation of standardized assessment and  
reporting of myocardial infarction in contemporary randomized controlled trials: a  
systematic review. *Eur Heart J* 2013;34(12):894-902d. doi: 10.1093/eurheartj/ehh003  
ehh003 [pii] [published Online First: 2013/01/29]  
34. WMA Declaration of Helsinki - Ethical Principles for Medical Research Involving Human Subjects.  
Available from [www.wma.net/en/30publications/10policies/b3/index.html](http://www.wma.net/en/30publications/10policies/b3/index.html) (accessed 17  
October 2012).

- 1
- 2
- 3 35. Caironi P, Tognoni G, Masson S, Fumagalli R, Persenti A, Romero M, et al. Albumin replacement
- 4 in patients with severe sepsis or septic shock. *N Engl J Med*. 2014. doi:
- 5 10.1056/NEJMoa1305727.
- 6
- 7 36. Koenker R, Bassett G. Regression quantiles. *Econometrica* 1978;46:33–50.
- 8
- 9 37. Wu CFJ. Jackknife, bootstrap and other resampling methods in regression analysis. *Ann Stat*
- 10 1986;14:1261-350.
- 11
- 12 38. He X, Hu F. Markov chain marginal bootstrap. *J Am Stat Assoc* 2002;97:783-95.
- 13
- 14 39. Koenker R, Machado JAF. Goodness of fit and related inference processes for quantile
- 15 regression. *Journal of the American Statistical Association* 1999;94:1296–310.
- 16
- 17 40. Berwick DM, Nolan TW, Whittington J. The triple aim: care, health, and cost. *Health Aff*
- 18 (*Millwood*) 2008;27(3):759-69. doi: 10.1377/hlthaff.27.3.759
- 19
- 20 41. Lee VS, Kawamoto K, Hess R, et al. Implementation of a Value-Driven Outcomes Program to
- 21 Identify High Variability in Clinical Costs and Outcomes and Association With Reduced Cost
- 22 and Improved Quality. *Jama* 2016;316(10):1061-72. doi: 10.1001/jama.2016.12226
- 23 [published Online First: 2016/09/14]
- 24
- 25 42. Bauer M, Fitzgerald L, Haesler E, et al. Hospital discharge planning for frail older people and their
- 26 family. Are we delivering best practice? A review of the evidence. *J Clin Nurs*
- 27 2009;18(18):2539-46. doi: 10.1111/j.1365-2702.2008.02685.x [published Online First:
- 28 2009/04/21]
- 29
- 30 43. Birkmeyer JD, Gust C, Dimick JB, et al. Hospital quality and the cost of inpatient surgery in the
- 31 United States. *Ann Surg* 2012;255(1):1-5. doi: 10.1097/SLA.0b013e3182402c17
- 32
- 33 44. Jencks SF, Williams MV, Coleman EA. Rehospitalizations among patients in the Medicare fee-for-
- 34 service program. *N Engl J Med* 2009;360(14):1418-28. doi: 10.1056/NEJMsa0803563
- 35 [published Online First: 2009/04/03]
- 36
- 37 45. Zuckerman RB, Sheingold SH, Orav EJ, et al. Readmissions, Observation, and the Hospital
- 38 Readmissions Reduction Program. *N Engl J Med* 2016;374(16):1543-51. doi:
- 39 10.1056/NEJMsa1513024
- 40
- 41 46. Danino JF, Taylor T, Metcalfe CW, et al. Readmission rates and financial penalties after ear, nose
- 42 and throat surgery: how can we improve? *Br J Hosp Med (Lond)* 2015;76(11):655-7. doi:
- 43 10.12968/hmed.2015.76.11.655
- 44
- 45 47. Hannan EL, Zhong Y, Lahey SJ, et al. 30-Day Readmissions After Coronary Artery Bypass Graft
- 46 Surgery in New York State. *JACC: Cardiovascular Interventions* 2011;4(5):569-76. doi:
- 47 <http://dx.doi.org/10.1016/j.jcin.2011.01.010>
- 48
- 49 48. Ahmed J, Khan S, Lim M, et al. Enhanced recovery after surgery protocols - compliance and
- 50 variations in practice during routine colorectal surgery. *Colorectal Dis* 2012;14(9):1045-51.
- 51 doi: 10.1111/j.1463-1318.2011.02856.x [published Online First: 2011/10/12]
- 52
- 53 49. Group EC. The Impact of Enhanced Recovery Protocol Compliance on Elective Colorectal Cancer
- 54 Resection: Results From an International Registry. *Ann Surg* 2015;261(6):1153-9. doi:
- 55 10.1097/SLA.0000000000001029
- 56
- 57 50. Myles PS, Devereaux PJ. Pros and cons of composite endpoints in anesthesia trials.
- 58 *Anesthesiology* 2010;113(4):776-8. doi: 10.1097/ALN.0b013e3181ee2ceb [published Online
- 59 First: 2010/09/03]
- 60
51. Ferreira-Gonzalez I, Permyner-Miralda G, Busse JW, et al. Composite outcomes can distort the
- nature and magnitude of treatment benefits in clinical trials. *Ann Intern Med*
- 2009;150(8):566-7. doi: 10.1093/ajcp/150/8/566 [pii] [published Online First: 2009/04/22]
- 52
- 53 52. Pogue J, Thabane L, Devereaux PJ, et al. Testing for heterogeneity among the components of a
- 54 binary composite outcome in a clinical trial. *BMC Med Res Methodol* 2010;10:49. doi:
- 55 10.1186/1471-2288-10-49
- 56
- 57 53. Khuri SF, Henderson WG, DePalma RG, et al. Determinants of long-term survival after major
- 58 surgery and the adverse effect of postoperative complications. *Ann Surg* 2005;242(3):326-
- 59
- 60

1  
2  
3 41; discussion 41-3. doi: 00000658-200509000-00004 [pii] [published Online First:  
4 2005/09/02]

5 54. Myles PS, Peyton P, Silbert B, et al. Perioperative epidural analgesia for major abdominal surgery  
6 for cancer and recurrence-free survival: randomised trial. *BMJ* 2011;342:d1491. doi:  
7 10.1136/bmj.d1491  
8

9 bmj.d1491 [pii] [published Online First: 2011/03/31]

10 55. Sheingold SH, Zuckerman R, Shartz A. Understanding Medicare Hospital Readmission Rates  
11 And Differing Penalties Between Safety-Net And Other Hospitals. *Health Aff (Millwood)*  
12 2016;35(1):124-31. doi: 10.1377/hlthaff.2015.0534  
13  
14  
15  
16  
17  
18  
19  
20  
21  
22  
23  
24  
25  
26  
27  
28  
29  
30  
31  
32  
33  
34  
35  
36  
37  
38  
39  
40  
41  
42  
43  
44  
45  
46  
47  
48  
49  
50  
51  
52  
53  
54  
55  
56  
57  
58  
59  
60



1  
2  
3  
4  
5  
6  
7  
8  
9  
10  
11  
12  
13  
14  
15  
16  
17  
18  
19  
20  
21  
22  
23  
24  
25  
26  
27  
28  
29  
30  
31  
32  
33  
34  
35  
36  
37  
38  
39  
40  
41  
42  
43  
44  
45  
46  
47  
48  
49  
50  
51  
52  
53  
54  
55  
56  
57  
58  
59  
60

**Legend**

**Figure 1. Frequency Distribution of Days at Home up to 30 Days after Surgery (n=2109). The smoothing line (kernel) is a non-parametric estimate of the probability density function.**

For peer review only

**Table 1. Days at Home up to 30 Days after Surgery (DAH<sub>30</sub>) According to Types of Surgery.**

| Surgery                        | No. of patients | No. admitted to a rehabilitation hospital (%) | Median (95% CI) DAH <sub>30</sub> <sup>†</sup> |
|--------------------------------|-----------------|-----------------------------------------------|------------------------------------------------|
| Cardiac                        | 679             | 54 (8.0)                                      | 22.8 (22.6-22.9)                               |
| Orthopaedic                    | 289             | 122 (42)                                      | 21.9 (21.2-22.6)                               |
| Neurosurgery                   | 220             | 9 (4.0)                                       | 22.8 (22.2-23.5)                               |
| Colorectal                     | 118             | 8 (6.8)                                       | 24.9 (23.9-26.0)                               |
| Urology                        | 315             | 26 (8.3)                                      | 23.8 (23.0-24.5)                               |
| Vascular                       | 56              | 1 (1.8)                                       | 26.0 (24.3-27.3)                               |
| Ear, nose, throat              | 99              | 17 (17)                                       | 25.8 (24.9-27.0)                               |
| Oesophagogastric/hepatobiliary | 253             | 4 (1.6)                                       | 24.9 (23.8-26.1)                               |
| Thoracic                       | 28              | 2 (7.1)                                       | 22.8 (17.8-27.8)                               |
| Other                          | 52              | 2 (3.8)                                       | 28.8 (27.7-30.0)                               |

<sup>†</sup> hospital days do not include those spent in a rehabilitation facility

**Table 2. Days at Home up to 30 Days after Surgery (DAH<sub>30</sub>) According to Patient and Perioperative Characteristics.**

| Variable               | no. (%)   | Raw median DAH <sub>30</sub> (95% CI) | P value | Adjusted median DAH <sub>30</sub> (95% CI) <sup>†</sup> | P-value |
|------------------------|-----------|---------------------------------------|---------|---------------------------------------------------------|---------|
| Patient age            |           |                                       | <0.001  |                                                         | <0.001  |
| <50 years              | 220 (11)  | 24.9 (24.4 - 25.4)                    |         | 24.8 (24.4 - 25.2)                                      |         |
| 50-60 years            | 396 (19)  | 24.0 (23.4 - 24.6)                    |         | 24.4 (24.0 - 24.9)                                      |         |
| 60-70 years            | 612 (29)  | 23.9 (23.8 - 24.0)                    |         | 24.0 (23.6 - 24.3)                                      |         |
| 70-80 years            | 653 (31)  | 22.8 (22.6 - 23.0)                    |         | 23.0 (22.7 - 23.4)                                      |         |
| ≥80 years              | 228 (11)  | 22.7 (22.0 - 23.5)                    |         | 22.2 (21.7 - 22.7)                                      |         |
| Sex                    |           |                                       | 0.042   |                                                         | 0.14    |
| Male                   | 1427 (68) | 23.7 (23.1 - 24.2)                    |         | 23.7 (23.5 - 24.0)                                      |         |
| Female                 | 682 (32)  | 24.0 (23.7 - 24.2)                    |         | 23.5 (23.2 - 23.8)                                      |         |
| Smoker                 |           |                                       | 0.094   |                                                         |         |
| yes                    | 787 (37)  | 23.2 (22.6 - 23.8)                    |         | not done                                                |         |
| no                     | 1322 (63) | 23.8 (23.7 - 23.9)                    |         | not done                                                |         |
| Diabetes               |           |                                       | 0.003   |                                                         |         |
| yes                    | 697 (33)  | 23.0 (22.4 - 23.6)                    |         | not done                                                |         |
| no                     | 1412 (67) | 23.8 (23.8 - 23.9)                    |         | not done                                                |         |
| Heart failure          |           |                                       | 0.002   |                                                         |         |
| yes                    | 365 (17)  | 22.9 (22.4 - 23.4)                    |         | not done                                                |         |
| no                     | 1744 (83) | 23.8 (23.7 - 23.9)                    |         | not done                                                |         |
| ASA physical status    |           |                                       | <0.001  |                                                         | <0.001  |
| 1                      | 41 (1.9)  | 28.0 (26.3 - 29.7)                    |         | 25.9 (25.1 - 26.6)                                      |         |
| 2                      | 530 (25)  | 25.0 (24.7 - 25.3)                    |         | 24.4 (24.0 - 24.7)                                      |         |
| 3                      | 1024 (51) | 23.7 (23.1 - 24.3)                    |         | 23.6 (23.2 - 23.9)                                      |         |
| 4                      | 510 (24)  | 22.0 (21.4 - 22.5)                    |         | 23.0 (22.6 - 23.3)                                      |         |
| Duration of Surgery, h |           |                                       | <0.001  |                                                         | <0.001  |
| <2.0                   | 581 (29)  | 25.9 (25.7 - 26.1)                    |         | 25.6 (25.2 - 26.0)                                      |         |
| 2.0-2.99               | 412 (20)  | 24.0 (23.5 - 24.5)                    |         | 24.0 (23.7 - 24.3)                                      |         |
| 3.0-3.99               | 551 (26)  | 22.9 (22.8 - 23.1)                    |         | 23.1 (22.7 - 23.4)                                      |         |
| ≥4.0                   | 565 (27)  | 21.9 (21.4 - 22.3)                    |         | 22.0 (21.6 - 22.5)                                      |         |

<sup>†</sup>covariates including in the multivariable adjustment were: patient age, sex, American Society of Anesthesiologists (ASA) physical status and duration of surgery

**Table 3. Median (95% CI) Days at Home up to 30 Days after Surgery According to Postoperative Complications.**

| Variable (no. [%])                  | No. with complete data | Yes                | No                 | P value† |
|-------------------------------------|------------------------|--------------------|--------------------|----------|
| Myocardial infarction (120 [6.5])   | 1846                   | 20.8 (19.2 - 22.4) | 23.8 (23.7 - 23.9) | <0.001   |
| Stroke (13 [0.7])                   | 1846                   | 10.1 (2.5 - 17.7)  | 23.8 (23.5 - 24.0) | <0.001   |
| Pulmonary embolism (7 [0.4])        | 1846                   | 17.1 (8.4 - 25.9)  | 23.7 (23.5 - 24.0) | 0.012    |
| Cardiac arrest (3 [0.2])            | 1846                   | 17.7 (0.9 - 34.5)  | 23.7 (23.5 - 24.0) | 0.018    |
| Surgical site infection (129 [7.0]) | 1846                   | 21.0 (19.0 - 23.0) | 23.8 (23.7 - 23.9) | <0.001   |
| Any of the above (263 [14.2])       | 1846                   | 20.5 (19.1 - 21.9) | 23.9 (23.8 - 23.9) | <0.001   |
| Hospital readmission (150 [7.1])    | 2090                   | 17.9 (16.3 - 19.5) | 23.9 (23.8 - 23.9) | <0.001   |

† P values calculated using the quasi-likelihood ratio test.

1  
2  
3  
4  
5  
6  
7  
8  
9  
10  
11  
12  
13  
14  
15  
16  
17  
18  
19  
20  
21  
22  
23  
24  
25  
26  
27  
28  
29  
30  
31  
32  
33  
34  
35  
36  
37  
38  
39  
40  
41  
42  
43  
44  
45  
46  
47  
48  
49  
50  
51  
52  
53  
54  
55  
56  
57  
58  
59  
60

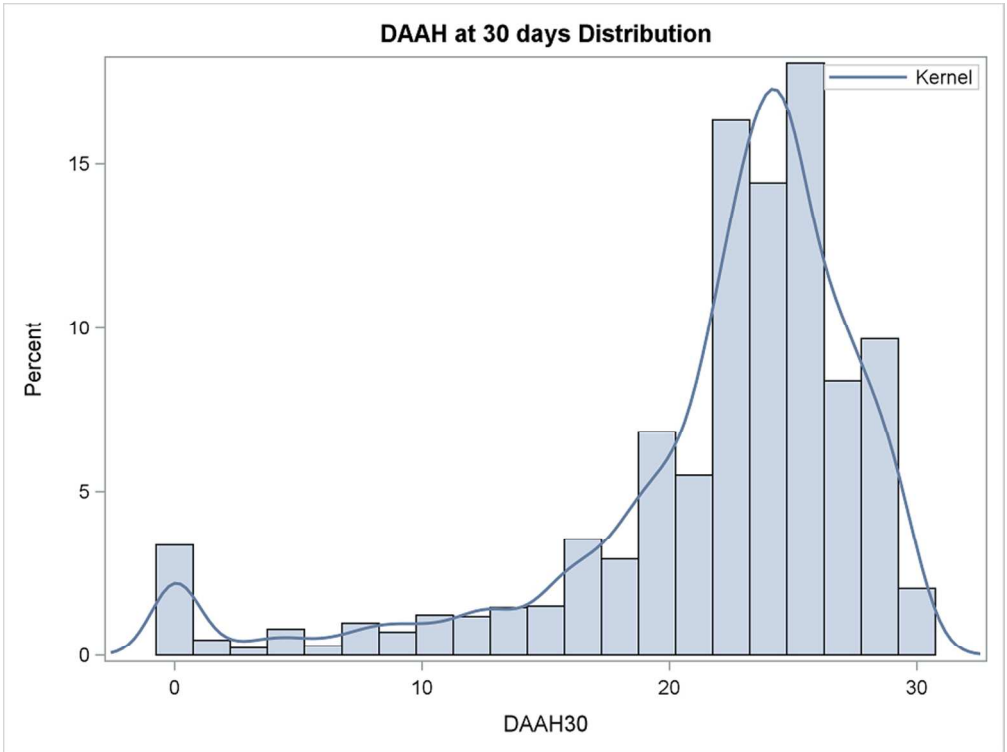

Figure 1. Frequency Distribution of Days at Home up to 30 Days after Surgery (n=2109). The smoothing line (kernel) is a non-parametric estimate of the probability density function.

84x63mm (300 x 300 DPI)

## Supplementary Appendix

This appendix has been provided by the authors to give readers additional information about their work.

Supplement to: Days Alive and at Home after Surgery

|                                                                                                                                                                                                                 | Page |
|-----------------------------------------------------------------------------------------------------------------------------------------------------------------------------------------------------------------|------|
| <b>Proposed method of calculation of “days at home within 30 days of surgery” (DAH<sub>30</sub>)</b>                                                                                                            | 2    |
| <b>Table S1.</b> Trial data sources                                                                                                                                                                             | 3    |
| <b>Figure S1.</b> The impact of the quantile (50 <sup>th</sup> – 75 <sup>th</sup> percentile) choice for DAH <sub>30</sub>                                                                                      | 4    |
| <b>Table S2.</b> Third quartile (Q3) days at home up to 30 days after surgery (DAH <sub>30</sub> ) according to patient and perioperative characteristics                                                       | 5    |
| <b>Table S3.</b> Third quartile (Q3) (95% CI) days at home up to 30 days after surgery according to postoperative complications                                                                                 | 6    |
| <b>Table S4.</b> Days at home up to 30 days after surgery (DAH <sub>30-rehab</sub> ), assuming 5 days’ admission to a rehabilitation facility if it occurred, according to types of surgery.                    | 7    |
| <b>Table S5.</b> Days at home up to 30 days after surgery (DAH <sub>30</sub> ), assuming 5 days’ admission to a rehabilitation facility if it occurred, according to patient and perioperative characteristics  | 8    |
| <b>Table S6.</b> Median (95% CI) days at home up to 30 days after surgery, assuming 5 days’ admission to a rehabilitation facility if it occurred, according to postoperative complications                     | 9    |
| <b>Table S7.</b> Days at home up to 30 days after surgery (DAH <sub>30-rehab</sub> ), assuming 14 days’ admission to a rehabilitation facility if it occurred, according to types of surgery.                   | 10   |
| <b>Table S8.</b> Days at home up to 30 days after surgery (DAH <sub>30</sub> ), assuming 14 days’ admission to a rehabilitation facility if it occurred, according to patient and perioperative characteristics | 11   |
| <b>Table S9.</b> Median (95% CI) days at home up to 30 days after surgery, assuming 14 days’ admission to a rehabilitation facility if it occurred, according to postoperative complications                    | 12   |

### Proposed Method of Calculation of “Days at Home within 30 days of Surgery” (DAH<sub>30</sub>)

DAH<sub>30</sub> is a composite measure incorporating hospital length of stay in the hospital following the index surgery, re-admission to either the index or any other hospital, and including post-acute hospital discharge to a rehabilitation centre/hospital or other nursing facility, and early deaths after surgery, into a single outcome metric.

DAH<sub>30</sub> is a numerical outcome measure that provides greater statistical power to detect clinically important differences in outcome. It is likely that a 0.5 day difference would be clinically important and valued by most people. A hospital bed day has been costed at £400 by the NHS in the UK, and \$1800 in the US. It has the potential to increase the available hospital beds by about 8%.

By its very nature, DAH<sub>30</sub> will be left-skewed with a spike at 0 (reflecting in-hospital deaths and those still admitted to hospital or other nursing facility at 30 days after surgery).

DAH<sub>30</sub> is calculated using mortality and hospitalisation data from the date of the index surgery (= Day 0). For example, if a patient died on day 2 after their surgery whilst still an inpatient, they would be assigned 0 DAH<sub>30</sub>; if a patient was discharged from hospital on Day 6 after surgery but was subsequently readmitted for 4 days before their second hospital discharge, then they would be assigned 20 DAH<sub>30</sub>. If a patient has complications and spends 16 days in hospital, and then is transferred to a nursing facility for rehabilitation, and spend 24 days there before finally being discharged to their own home, they would be assigned 0 DAH<sub>30</sub>. (30-16-24 = -10, but the minimum value of DAH<sub>30</sub> should be zero\*).

Patients having a planned re-admission (eg. removal of a stent or secondary closure of a fistula) within 30 days of surgery should have these days subtracted from the total DAH<sub>30</sub>. That is, if a patient is discharged from hospital on Day 13, and is electively re-admitted two weeks later (Day 27) for a further 2 days, their DAH<sub>30</sub> will be calculated as 30-13-2 (=15).

**Important:** If a patient dies within 30 days of surgery, irrespective of whether they have spent some time at home, DAH<sub>30</sub> should be scored as zero (0).

\*an alternative would be to use DAH<sub>90</sub> (up to 90 days after surgery) as an outcome metric in circumstances where a longer postoperative recovery is expected.

**Table S1. Trial Data Sources**

| Trial                                                                                                                                                                | N   | Reference                               |
|----------------------------------------------------------------------------------------------------------------------------------------------------------------------|-----|-----------------------------------------|
| 1. Tranexamic acid in coronary artery surgery                                                                                                                        | 613 | N Engl J Med 2016; Oct                  |
| 2. The safety of addition of nitrous oxide to general anaesthesia in at-risk patients having major non-cardiac surgery (ENIGMA-II): a randomised, single-blind trial | 516 | Lancet 2014; 384:1446-54.               |
| 3. An enhanced recovery after surgery (ERAS) program for hip and knee arthroplasty                                                                                   | 310 | Med J Aust 2015; 202:363-8.             |
| 4. Experience of an enhanced recovery after surgery (ERAS) program for elective abdominal surgery                                                                    | 71  | Anaesth Intensive Care 2012; 40:450-9.  |
| 5. The measurement of disability-free survival after surgery                                                                                                         | 163 | Anesthesiology 2015; 122:524-36.        |
| 6. Perioperative management of patients treated with angiotensin converting enzyme inhibitors and angiotensin II receptor blockers: a quality improvement audit      | 263 | Anaesth Intensive Care 2016; 44:346-52. |
| 7. Restrictive versus liberal fluid therapy in major abdominal surgery                                                                                               | 173 | ClinicalTrials.gov NCT01424150          |



1  
2  
3  
4  
5  
6  
7  
8  
9  
10  
11  
12  
13  
14  
15  
16  
17  
18  
19  
20  
21  
22  
23  
24  
25  
26  
27  
28  
29  
30  
31  
32  
33  
34  
35  
36  
37  
38  
39  
40  
41  
42  
43  
44  
45  
46  
47  
48  
49  
50  
51  
52  
53  
54  
55  
56  
57  
58  
59  
60

**Figure S1.** The impact of the quantile (50<sup>th</sup> – 75<sup>th</sup> percentile) choice for days at home up to 30 days (here, DAAH30) on the associations of patient age category, ASA physical status and surgical duration, demonstrating the covariates are reasonably stable over this range.

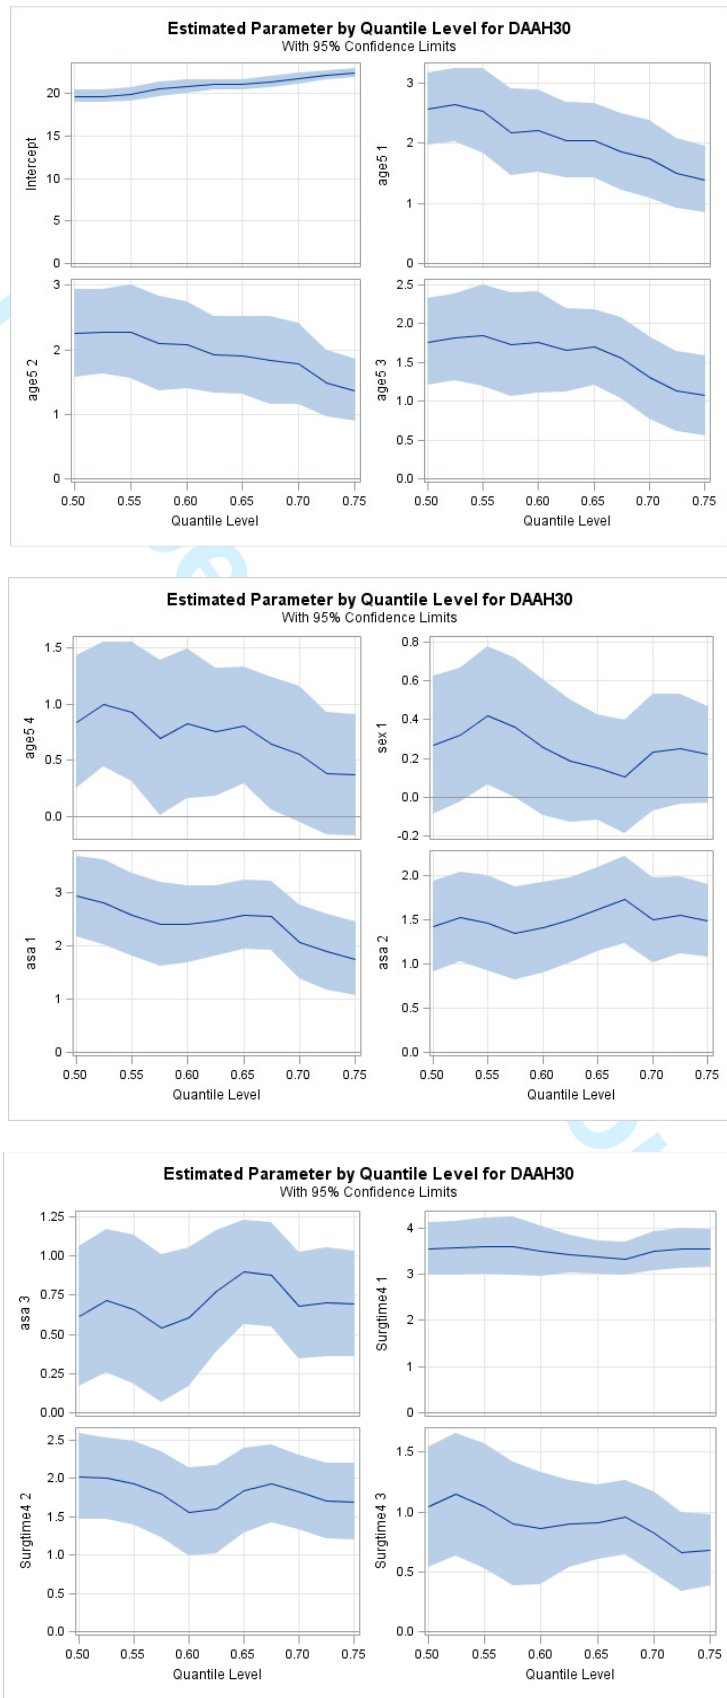

**Table S2. Third Quartile (Q3) Days at Home up to 30 Days after Surgery (DAH<sub>30</sub>) According to Patient and Perioperative Characteristics.#**

| Variable               | no. (%)   | Raw Q3<br>DAH <sub>30</sub> (95% CI) | P value | Adjusted Q3<br>DAH <sub>30</sub> (95% CI)* | P-value |
|------------------------|-----------|--------------------------------------|---------|--------------------------------------------|---------|
| Patient age            |           |                                      |         |                                            |         |
| <50 years              | 220 (11)  | 27.2 ( 26.5 , 27.9 )                 | <.0001  | 26.1 ( 25.8 , 26.5 )                       | <0.0001 |
| 50-60 years            | 396 (19)  | 25.9 ( 25.5 , 26.4 )                 |         | 26.1 ( 25.9 , 26.4 )                       |         |
| 60-70 years            | 612 (29)  | 25.7 ( 25.0 , 26.4 )                 |         | 25.8 ( 25.6 , 26.1 )                       |         |
| 70-80 years            | 653 (31)  | 25.0 ( 24.6 , 25.4 )                 |         | 25.1 ( 24.8 , 25.4 )                       |         |
| ≥80 years              | 228 (11)  | 24.8 ( 24.3 , 25.3 )                 |         | 24.7 ( 24.1 , 25.4 )                       |         |
| Sex                    |           |                                      |         |                                            |         |
| Male                   | 1427 (68) | 25.1 ( 24.8 , 25.4 )                 | <.0001  | 25.6 ( 25.5 , 25.8 )                       | 0.146   |
| Female                 | 682 (32)  | 26.2 ( 25.6 , 26.8 )                 |         | 25.4 ( 25.2 , 25.7 )                       |         |
| Smoker                 |           |                                      |         |                                            |         |
| yes                    | 787 (37)  | 25.0 ( 24.8 , 25.1 )                 | <.0001  | not done                                   |         |
| no                     | 1322 (63) | 26.0 ( 25.7 , 26.2 )                 |         | not done                                   |         |
| Diabetes               |           |                                      |         |                                            |         |
| yes                    | 697 (33)  | 25.8 ( 25.1 , 26.5 )                 | >.99    | not done                                   |         |
| no                     | 1412 (67) | 25.8 ( 25.6 , 26.0 )                 |         | not done                                   |         |
| Heart failure          |           |                                      |         |                                            |         |
| yes                    | 365 (17)  | 25.9 ( 25.2 , 26.7 )                 | 0.39    | not done                                   |         |
| no                     | 1744 (83) | 25.8 ( 25.4 , 26.2 )                 |         | not done                                   |         |
| ASA physical status    |           |                                      |         |                                            |         |
| 1                      | 41 (1.9)  | 29.0 ( 28.8 , 29.3 )                 | <.0001  | 26.6 ( 26.0 , 27.2 )                       | <0.0001 |
| 2                      | 530 (25)  | 27.0 ( 26.9 , 27.1 )                 |         | 26.3 ( 26.0 , 26.6 )                       |         |
| 3                      | 1024 (51) | 25.8 ( 25.3 , 26.3 )                 |         | 25.5 ( 25.3 , 25.8 )                       |         |
| 4                      | 510 (24)  | 23.9 ( 23.8 , 24.0 )                 |         | 24.8 ( 24.5 , 25.1 )                       |         |
| Duration of Surgery, h |           |                                      |         |                                            |         |
| <2.0                   | 581 (29)  | 28.1 ( 27.7 , 28.6 )                 | <.0001  | 27.6 ( 27.3 , 28.0 )                       | <0.0001 |
| 2.0-2.99               | 412 (20)  | 26.1 ( 25.6 , 26.5 )                 |         | 25.8 ( 25.4 , 26.2 )                       |         |
| 3.0-3.99               | 551 (26)  | 24.8 ( 24.7 , 24.9 )                 |         | 24.8 ( 24.5 , 25.0 )                       |         |
| ≥4.0                   | 565 (27)  | 23.9 ( 23.8 , 23.9 )                 |         | 24.1 ( 23.8 , 24.4 )                       |         |

# The effect of the different covariates were largely consistent across a large range of meaningful percentile values (e.g. 50<sup>th</sup> – 75<sup>th</sup>) with a slightly smaller effect for age categories as the percentile gets higher but for simplicity we only present the results for Q3 (75<sup>th</sup> percentile). This percentile is also close to the main mode of the distribution.

\*covariates including in the multivariable adjustment were: patient age, sex, American Society of Anesthesiologists (ASA) physical status and duration of surgery

**Table S3. Third Quartile (Q3) (95% CI) Days at Home up to 30 Days after Surgery According to Postoperative Complications.**

| Variable (no. [%])                  | No. with complete data | Yes                | No                 | P value <sup>a</sup> |
|-------------------------------------|------------------------|--------------------|--------------------|----------------------|
| Myocardial infarction (120 [6.5])   | 1846                   | 22.9 (22.2 - 23.5) | 25.8 (25.4 - 26.2) | <0.0001              |
| Stroke (13 [0.7])                   | 1846                   | 18.9 (10.0 - 27.8) | 25.2 (24.6 - 25.7) | 0.019                |
| Pulmonary embolism (7 [0.4])        | 1846                   | 23.1 (16.1 - 30.1) | 25.2 (24.6 - 25.7) | 0.19                 |
| Cardiac arrest (3 [0.2])            | 1846                   | 20.1 (8.0 - 32.1)  | 25.2 (24.6 - 25.7) | 0.052                |
| Surgical site infection (129 [7.0]) | 1846                   | 24.8 (23.7 - 26.0) | 25.3 (24.7 - 25.9) | <0.0001              |
| Any of the above (263 [14.2])       | 1846                   | 23.7 (23.0 - 24.5) | 25.8 (25.6 - 26.1) | <0.0001              |
| Hospital readmission (150 [7.1])    | 2090                   | 21.7 (20.8 - 22.7) | 25.9 (25.8 - 26.0) | <0.0001              |

<sup>a</sup> P values calculated using likelihood ratio test.

**Table S4. Days at Home up to 30 Days after Surgery (DAH<sub>30-rehab</sub>), Assuming 5 Days' Admission to a Rehabilitation Facility if it Occurred, According to Types of Surgery.**

| Surgery                                | No. admitted to a rehabilitation hospital (%) | Mean (95% CI) DAH <sub>30-rehab</sub> |
|----------------------------------------|-----------------------------------------------|---------------------------------------|
| Cardiac (n=679)                        | 54 (8.0)                                      | 22.8 (22.7-22.9)                      |
| Orthopaedic (n=289)                    | 122 (42)                                      | 21.9 (21.2-22.6)                      |
| Neurosurgery (n=220)                   | 9 (4.0)                                       | 22.8 (22.2-23.5)                      |
| Colorectal (n=118)                     | 8 (6.8)                                       | 24.9 (24.1-25.8)                      |
| Urology (n=315)                        | 26 (8.3)                                      | 23.8 (23.0-24.5)                      |
| Vascular (n=56)                        | 1 (1.8)                                       | 26.0 (24.4-27.6)                      |
| Ear, nose, throat (n=99)               | 17 (17)                                       | 25.8 (24.3-27.3)                      |
| Oesophagogastric/hepatobiliary (n=253) | 4 (1.6)                                       | 24.9 (23.8-26.1)                      |
| Thoracic (n=28)                        | 2 (7.1)                                       | 22.8 (17.9-27.8)                      |
| Other (n=52)                           | 2 (3.8)                                       | 28.8 (27.7-30.0)                      |

**Table S5. Days at Home up to 30 Days after Surgery (DAH<sub>30</sub>), Assuming 5 Days' Admission to a Rehabilitation Facility if it Occurred, According to Patient and Perioperative Characteristics.<sup>∞</sup>**

| Variable               | no. (%)   | Raw median<br>DAH <sub>30-rehab</sub> (95% CI) | P value | Adjusted median<br>DAH <sub>30-rehab</sub> (95% CI)* | P value# |
|------------------------|-----------|------------------------------------------------|---------|------------------------------------------------------|----------|
| Patient age            |           |                                                | <0.0001 |                                                      | <0.0001  |
| <50 years              | 220 (11)  | 24.9 (24.5 - 25.2)                             |         | 24.6 (24.2 - 25.1)                                   |          |
| 50-60 years            | 396 (19)  | 23.9 (23.5 - 24.3)                             |         | 24.5 (24.0 - 25.0)                                   |          |
| 60-70 years            | 612 (29)  | 23.8 (23.5 - 24.1)                             |         | 23.6 (23.2 - 24.0)                                   |          |
| 70-80 years            | 653 (31)  | 22.0 (21.5 - 22.4)                             |         | 22.5 (21.9 - 23.1)                                   |          |
| ≥80 years              | 228 (11)  | 20.9 (19.6 - 22.2)                             |         | 21.4 (20.4 - 22.4)                                   |          |
| Sex                    |           |                                                | 0.90    |                                                      | 0.0052   |
| male                   | 1427 (68) | 23.0 (22.6 - 23.4)                             |         | 23.6 (23.3 - 23.9)                                   |          |
| female                 | 682 (32)  | 23.0 (22.4 - 23.6)                             |         | 22.7 (22.2 - 23.3)                                   |          |
| Smoker                 |           |                                                | >0.99   |                                                      |          |
| yes                    | 787 (37)  | 23.0 (22.5 - 23.5)                             |         |                                                      |          |
| no                     | 1322 (63) | 23.0 (22.6 - 23.4)                             |         |                                                      |          |
| Diabetes               |           |                                                | 0.091   |                                                      |          |
| yes                    | 697 (33)  | 22.8 (22.6 - 23.1)                             |         |                                                      |          |
| no                     | 1412 (67) | 23.2 (22.6 - 23.8)                             |         |                                                      |          |
| Heart failure          |           |                                                | 0.16    |                                                      |          |
| yes                    | 365 (17)  | 22.8 (22.3 - 23.3)                             |         |                                                      |          |
| no                     | 1744 (83) | 23.1 (22.6 - 23.7)                             |         |                                                      |          |
| ASA physical status    |           |                                                |         |                                                      |          |
| 1                      | 41 (1.9)  | 27.9 (26.1 - 29.7)                             |         | 25.3 (24.3 - 26.3)                                   | <0.0001  |
| 2                      | 530 (25)  | 24.9 (24.6 - 25.1)                             | <0.0001 | 24.0 (23.6 - 24.5)                                   |          |
| 3                      | 1024 (51) | 22.9 (22.7 - 23.1)                             |         | 23.1 (22.7 - 23.5)                                   |          |
| 4                      | 510 (24)  | 21.9 (21.5 - 22.3)                             |         | 22.9 (22.4 - 23.4)                                   |          |
| Duration of Surgery, h |           |                                                | <0.0001 |                                                      | <0.0001  |
| <2.0                   | 581 (29)  | 25.8 (25.1 - 26.4)                             |         | 25.4 (24.9 - 26.0)                                   |          |
| 2.0-2.99               | 412 (20)  | 23.8 (23.3 - 24.3)                             |         | 23.6 (23.2 - 24.0)                                   |          |
| 3.0-3.99               | 551 (26)  | 22.8 (22.7 - 23.0)                             |         | 22.7 (22.3 - 23.1)                                   |          |
| ≥4.0                   | 565 (27)  | 21.8 (21.0 - 22.5)                             |         | 21.6 (20.9 - 22.2)                                   |          |

\*covariates including in the multivariable adjustment were: patient age, sex, American Society of Anesthesiologists (ASA) physical status and duration of surgery

#P values calculated using the quasi-likelihood ratio test.

<sup>∞</sup> If a patient has spent less than 5 days at home and went to rehab, DAH<sub>30-rehab</sub> is set to 0 to avoid negative values.

**Table S6. Median (95% CI) Days at Home up to 30 Days after Surgery, Assuming 5 Days' Admission to a Rehabilitation Facility if it Occurred, According to Postoperative Complications.\***

| Variable (no. [%])                  | No. with complete data | Yes                | No                              | P value <sup>a</sup> |
|-------------------------------------|------------------------|--------------------|---------------------------------|----------------------|
| Myocardial infarction (120 [6.5])   | 1846                   | 19.0 (16.6 - 21.5) | 23.1 (22.6 - 23.7)              | <0.0001              |
| Stroke (13 [0.7])                   | 1846                   | 10.1 (3.7 - 16.5)  | 23.0 (22.8 - 23.2)              | <0.0001              |
| Pulmonary embolism (7 [0.4])        | 1846                   | 17.1 (8.0 - 26.3)  | 23.0 (22.7 - 23.2)              | 0.032                |
| Cardiac arrest (3 [0.2])            | 1846                   | 15.1 (0.7 - 29.4)  | 23.0 (22.8 - 23.2)              | 0.0065               |
| Surgical site infection (129 [7.0]) | 1846                   | 20.7 (18.9 - 22.6) | 23.1 (22.6 - 23.6)              | <0.0001              |
| Any of the above (263 [14.2])       | 1846                   | 19.1 (17.5 - 20.8) | 23.7 (23.3 - 24.1)              | <0.0001              |
| Hospital readmission (150 [7.1])    | 2090                   | 17.2 (15.4 - 19.0) | 23.7 (23.3 - 24.1) <sup>b</sup> | <0.0001              |

<sup>a</sup> P values calculated using the quasi-likelihood ratio test.

<sup>b</sup> days calculated for those without readmission after excluding postoperative deaths.

\* If a patient has spent less than 5 days at home and went to rehab, DAH<sub>30-rehab</sub> is set to 0 to avoid negative values.

**Table S7. Days at Home up to 30 Days after Surgery (DAH<sub>30-rehab</sub>), Assuming 14 Days' Admission to a Rehabilitation Facility if it Occurred, According to Types of Surgery.\***

| Surgery                                | No. admitted to a rehabilitation hospital (%) | Median (95% CI) DAH <sub>30-rehab</sub> |
|----------------------------------------|-----------------------------------------------|-----------------------------------------|
| Cardiac (n=679)                        | 54 (8.0)                                      | 22.8 (22.6-22.9)                        |
| Orthopedic (n=289)                     | 122 (42)                                      | 20.9 (17.5-24.4)                        |
| Neurosurgery (n=220)                   | 9 (4.0)                                       | 22.8 (22.2-23.5)                        |
| Colorectal (n=118)                     | 8 (6.8)                                       | 24.9 (23.9-26.0)                        |
| Urology (n=315)                        | 26 (8.3)                                      | 23.8 (23.0-24.5)                        |
| Vascular (n=56)                        | 1 (1.8)                                       | 26.0 (24.4-27.6)                        |
| Ear, nose, throat (n=99)               | 17 (17)                                       | 25.8 (24.3-27.3)                        |
| Oesophagogastric/hepatobiliary (n=253) | 4 (1.6)                                       | 24.9 (23.8-26.1)                        |
| Thoracic (n=28)                        | 2 (7.1)                                       | 22.8 (17.8-27.8)                        |
| Other (n=52)                           | 2 (3.8)                                       | 28.8 (27.7-30.0)                        |

\*If a patient has spent less than 5 days at home and went to rehab, DAH<sub>30-rehab</sub> is set to 0 to avoid negative values.

**Table S8. Days at Home up to 30 Days after Surgery (DAH<sub>30</sub>), Assuming 14 Days' Admission to a Rehabilitation Facility if it Occurred, According to Patient and Perioperative Characteristics.#**

| Variable               | no. (%)   | Raw median<br>DAH <sub>30-rehab</sub> (95% CI) | P value | Adjusted median<br>DAH <sub>30-rehab</sub> (95% CI)* | P value |
|------------------------|-----------|------------------------------------------------|---------|------------------------------------------------------|---------|
| Patient age            |           |                                                | <0.0001 |                                                      | <0.0001 |
| <50 years              | 220 (11)  | 24.9 (24.4 - 25.3)                             |         | 24.6 (24.2 - 25.1)                                   |         |
| 50-60 years            | 396 (19)  | 23.9 (23.6 - 24.3)                             |         | 24.5 (24.0 - 25.0)                                   |         |
| 60-70 years            | 612 (29)  | 23.8 (23.5 - 24.1)                             |         | 23.6 (23.3 - 24.0)                                   |         |
| 70-80 years            | 653 (31)  | 22.0 (21.5 - 22.4)                             |         | 22.5 (21.9 - 23.1)                                   |         |
| ≥80 years              | 228 (11)  | 20.9 (19.6 - 22.2)                             |         | 21.5 (20.5 , 22.4)                                   |         |
| Sex                    |           |                                                | 0.84    |                                                      | 0.0065  |
| male                   | 1427 (68) | 23.0 (22.6 - 23.4)                             |         | 23.6 (23.3 - 23.9)                                   |         |
| female                 | 682 (32)  | 23.0 (22.3 - 23.6)                             |         | 22.7 (22.2 - 23.3)                                   |         |
| Smoker                 |           |                                                | 0.92    |                                                      |         |
| yes                    | 787 (37)  | 23.0 (22.5 - 23.5)                             |         |                                                      |         |
| no                     | 1322 (63) | 23.0 (22.5 - 23.4)                             |         |                                                      |         |
| Diabetes               |           |                                                | 0.12    |                                                      |         |
| yes                    | 697 (33)  | 22.8 (22.6 - 23.1)                             |         |                                                      |         |
| no                     | 1412 (67) | 23.2 (22.5 - 23.8)                             |         |                                                      |         |
| Heart failure          |           |                                                | 0.19    |                                                      |         |
| yes                    | 365 (17)  | 22.8 (22.3 - 23.3)                             |         |                                                      |         |
| no                     | 1744 (83) | 23.1 (22.6 - 23.7)                             |         |                                                      |         |
| ASA physical status    |           |                                                | <0.0001 |                                                      | <0.0001 |
| 1                      | 41 (1.9)  | 27.9 (26.0 - 29.8)                             |         | 25.3 (24.2 - 26.3)                                   |         |
| 2                      | 530 (25)  | 24.9 (24.6 - 25.1)                             |         | 24.1 (23.6 - 24.6)                                   |         |
| 3                      | 1024 (51) | 22.9 (22.7 - 23.1)                             |         | 23.1 (22.7 - 23.5)                                   |         |
| 4                      | 510 (24)  | 21.9 (21.5 - 22.4)                             |         | 22.9 (22.4 - 23.4)                                   |         |
| Duration of Surgery, h |           |                                                | <0.0001 |                                                      | <0.0001 |
| <2.0                   | 581 (29)  | 25.8 (25.1 - 26.4)                             |         | 25.4 (24.9 - 26.0)                                   |         |
| 2.0-2.99               | 412 (20)  | 23.8 (23.3 - 24.4)                             |         | 23.6 (23.2 - 24.1)                                   |         |
| 3.0-3.99               | 551 (26)  | 22.8 (22.7 - 23.0)                             |         | 22.7 (22.3 - 23.1)                                   |         |
| ≥4.0                   | 565 (27)  | 21.8 (21.0 - 22.5)                             |         | 21.6 (20.9 - 22.2)                                   |         |

\*covariates including in the multivariable adjustment were: patient age, sex, American Society of Anesthesiologists (ASA) physical status and duration of surgery.

#If a patient has spent less than 5 days at home and went to rehab, DAH<sub>30-rehab</sub> is set to 0 to avoid negative values.



**Table S9. Median (95% CI) Days at Home up to 30 Days after Surgery, Assuming 14 Days' Admission to a Rehabilitation Facility if it Occurred, According to Postoperative Complications.**

| Variable (no. [%])                   | No. with complete data | Yes                  | No                                | P value <sup>a</sup> |
|--------------------------------------|------------------------|----------------------|-----------------------------------|----------------------|
| Myocardial infarction (120 [6.5])    | 1846                   | 19.0 ( 16.5 , 21.6 ) | 23.1 ( 22.6 , 23.7 )              | <0.0001              |
| Stroke (13 [ 0.7])                   | 1846                   | 10.1 ( 3.4 , 16.9 )  | 23.0 ( 22.8 , 23.2 )              | <0.0001              |
| Pulmonary embolism (7 [ 0.4])        | 1846                   | 17.1 ( 8.3 , 26.0 )  | 23.0 ( 22.7 , 23.2 )              | 0.032                |
| Cardiac arrest (3 [0.2])             | 1846                   | 15.1 ( 0.4 , 29.8 )  | 23.0 ( 22.8 , 23.2 )              | 0.0065               |
| Surgical site infection (129 [ 7.0]) | 1846                   | 20.7 ( 19.0 , 22.5 ) | 23.1 ( 22.6 , 23.6 )              | <0.0001              |
| Any of the above (263 [ 14.2])       | 1846                   | 19.1 ( 17.5 , 20.8 ) | 23.7 ( 23.3 , 24.1 )              | <0.0001              |
| Hospital readmission (150 [ 7.1])    | 2090                   | 17.2 ( 15.4 , 18.9 ) | 23.7 ( 23.3 , 24.1 ) <sup>b</sup> | <0.0001              |

<sup>a</sup> P values calculated using the quasi-likelihood ratio test.

<sup>b</sup> Days calculated for those without readmission after excluding postoperative deaths. If a patient has spent less than 5 days at home and went to rehab, DAH<sub>30-rehab</sub> is set to 0 to avoid negative values.

# BMJ Open

## Validation of Days at Home as an Outcome Measure after Surgery: a cohort study of clinical trial hospital, discharge and 30-day follow-up data

|                                 |                                                                                                                                                                                                                                                                                                                                                                                                                                                                                                                                                                 |
|---------------------------------|-----------------------------------------------------------------------------------------------------------------------------------------------------------------------------------------------------------------------------------------------------------------------------------------------------------------------------------------------------------------------------------------------------------------------------------------------------------------------------------------------------------------------------------------------------------------|
| Journal:                        | <i>BMJ Open</i>                                                                                                                                                                                                                                                                                                                                                                                                                                                                                                                                                 |
| Manuscript ID                   | bmjopen-2017-015828.R2                                                                                                                                                                                                                                                                                                                                                                                                                                                                                                                                          |
| Article Type:                   | Research                                                                                                                                                                                                                                                                                                                                                                                                                                                                                                                                                        |
| Date Submitted by the Author:   | 26-May-2017                                                                                                                                                                                                                                                                                                                                                                                                                                                                                                                                                     |
| Complete List of Authors:       | Myles, Paul; Alfred Hospital and Monash University, Anaesthesia and Perioperative Medicine<br>Shulman, Mark; Alfred Hospital<br>Heritier, Stephane; School of Public Health and Preventive Medicine, Monash University, Department of Epidemiology and Preventive Medicine<br>Wallace, Sophie; Alfred Hospital<br>McIlroy, David; Alfred Hospital, Department of Anaesthesia and Perioperative Medicine<br>McCluskey, Stuart; University Health Network, Anesthesia and Pain Medicine<br>Sillar, Isabella; Alfred Hospital<br>Forbes, Andrew; Monash University |
| <b>Primary Subject Heading</b>: | Anaesthesia                                                                                                                                                                                                                                                                                                                                                                                                                                                                                                                                                     |
| Secondary Subject Heading:      | Surgery, Epidemiology                                                                                                                                                                                                                                                                                                                                                                                                                                                                                                                                           |
| Keywords:                       | STATISTICS & RESEARCH METHODS, outcome, perioperative medicine, Clinical trials < THERAPEUTICS                                                                                                                                                                                                                                                                                                                                                                                                                                                                  |
|                                 |                                                                                                                                                                                                                                                                                                                                                                                                                                                                                                                                                                 |

SCHOLARONE™  
Manuscripts

1  
2  
3  
4  
5  
6  
7  
8  
9  
10  
11  
12  
13  
14  
15  
16  
17  
18  
19  
20  
21  
22  
23  
24  
25  
26  
27  
28  
29  
30  
31  
32  
33  
34  
35  
36  
37  
38  
39  
40  
41  
42  
43  
44  
45  
46  
47  
48  
49  
50  
51  
52  
53  
54  
55  
56  
57  
58  
59  
60

## Validation of Days at Home as an Outcome Measure after Surgery: a cohort study of clinical trial hospital, discharge and 30-day follow-up data

Paul S. Myles,<sup>1,2,3</sup> Mark A. Shulman,<sup>1</sup> Stephane Heritier,<sup>3</sup> Sophie Wallace,<sup>1</sup> David R. McIlroy,<sup>1,2</sup> Stuart McCluskey,<sup>4</sup> Isabella Sillar,<sup>2</sup> Andrew Forbes<sup>3</sup>

---

<sup>1</sup>Department of Anaesthesia and Perioperative Medicine, Alfred Hospital, Melbourne, Australia

<sup>2</sup>Department of Anaesthesia and Perioperative Medicine, Monash University, Melbourne, Australia

<sup>3</sup>Department of Epidemiology and Preventive Medicine, Monash University, Melbourne, Australia

<sup>4</sup>Toronto General Hospital and University of Toronto, Toronto, ON, Canada

### **ADDRESS FOR CORRESPONDENCE**

Paul S. Myles  
Professor and Chair  
Department of Anaesthesia and Perioperative Medicine  
Alfred Hospital, Commercial Road, Melbourne, Victoria, 3004, Australia

Email: p.myles@alfred.org.au

**Word count:** 3035

*The Corresponding Author has the right to grant on behalf of all authors and does grant on behalf of all authors, a worldwide licence to the Publishers and its licensees in perpetuity, in all forms, formats and media (whether known now or created in the future), to i) publish, reproduce, distribute, display and store the Contribution, ii) translate the Contribution into other languages, create adaptations, reprints, include within collections and create summaries, extracts and/or, abstracts of the Contribution, iii) create any other derivative work(s) based on the Contribution, iv) to exploit all subsidiary rights in the Contribution, v) the inclusion of electronic links from the Contribution to third party material where-ever it may be located; and, vi) licence any third party to do any or all of the above.*

Competing interest statement - All authors declare that the answer to the questions on the competing interest form are all No and therefore have nothing to declare.

Funding - The Australian and New Zealand College of Anaesthetists; and the Australian National Health and Medical Research Council Practitioner Fellowship (Prof Myles).

## ABSTRACT

**OBJECTIVE** To evaluate “days at home up to 30 days after surgery” (DAH<sub>30</sub>) as a patient-centred outcome measure.

**DESIGN** Prospective cohort study.

**DATA SOURCE** Using clinical trial data (7 trials, 2109 patients) we calculated DAH<sub>30</sub> from length of stay, re-admission, discharge destination, and death up to 30 days after surgery.

**MAIN OUTCOME** The association between DAH<sub>30</sub> and serious complications after surgery.

**RESULTS** One or more complications occurred in 263 of 1846 (14.2%) patients, including 19 (1.0%) deaths within 30 days of surgery; 245 (11.6%) patients were discharged to a rehabilitation facility and 150 (7.1%) were readmitted to hospital within 30 days of surgery. The median DAH<sub>30</sub> was significantly less in older patients ( $P < 0.001$ ), those with poorer physical functioning ( $P < 0.001$ ), and in those undergoing longer operations ( $P < 0.001$ ). Patients with serious complications had less days at home than patients without serious complications (20.5 [95% CI, 19.1 to 21.9] vs 23.9 [95% CI, 23.8 to 23.9]  $P < 0.001$ ), and had higher rates of readmission (16.0% vs. 5.9%;  $P < 0.001$ ). After adjusting for patient age, sex, physical status and duration of surgery, the occurrence of postoperative complications was associated with fewer days at home after surgery (difference 3.0 [95% CI, 2.1 to 4.0] days;  $P < 0.001$ ).

**CONCLUSIONS** DAH<sub>30</sub> has construct validity and is a readily-obtainable generic patient-centred outcome measure. It is a pragmatic outcome measure for perioperative clinical trials.

### Strengths and limitations of the study

- This study integrates length of stay, re-admission, discharge destination, and early deaths after surgery into a single outcome metric, “days at home up to 30 days after surgery” (DAH<sub>30</sub>)
- Patients hope to recover quickly after surgery, free of complications and need for re-admission; DAH<sub>30</sub> is thus a patient-centred outcome
- Accurate calculation of DAH<sub>30</sub> requires knowledge of post-discharge location (home or nursing facility) and any re-admissions at the index or other hospitals
- Because early deaths heavily influence the DAH<sub>30</sub> metric, this information should be additionally reported if, say, the incidence exceeds 10%

## Introduction

Surgery and other interventional procedures are intended to relieve symptoms and in many cases prolong life. But surgery is not risk-free; perioperative complications can impair patient recovery resulting in prolonged hospitalization, short or longer term disability, and sometimes poor survival. A wide variety of outcome measures have been used to quantify each of these aspects of the postoperative experience but few provide a broad, patient-centred perspective of effective and efficient care;<sup>1</sup> these are needed to better inform the current shift towards value-based healthcare.<sup>2,3</sup>

Patient-centred care requires clinicians to consider outcomes that matter most to patients. That is, the patient's experience of their illness, quality of life, and functioning; their values, preferences and goals for health care.<sup>4</sup> Loss of the ability to live independently is a major concern for the elderly;<sup>5,6</sup> it is clearly a patient-centred outcome, and has been associated with postoperative readmissions and death after hospital discharge.<sup>5</sup>

Specific peri-procedural complications such as surgical site infection, respiratory failure, delirium, and myocardial infarction are clearly important to patients and physicians alike, but reliable and consistent detection is problematic. In any case such information is an incomplete description of the overall success of surgery and other perioperative care, and does not describe the impact of such complications on functioning and need for institutionalization. Similar challenges occur when nominating endpoints in clinical trials, including a lack of standardisation,<sup>7</sup> need for adjudication, and uncertainty about the overall health impact of each endpoint on a patient's recovery. There is a growing acceptance that

1  
2  
3 outcome measures used in clinical trials should be determined in partnership by patients  
4  
5 and physician-researchers, aiming to identify outcomes that are important to patients.<sup>8</sup>  
6  
7

8  
9  
10 “Days alive and out of hospital” has been shown to be a readily quantifiable and patient-  
11  
12 centred outcome measure in some chronic cardiovascular conditions such as heart failure  
13  
14 and atrial fibrillation,<sup>9-11</sup> and in geriatric medicine,<sup>12</sup> but it has not been used as an outcome  
15  
16 measure in perioperative trials. Home discharge has been proposed as a proxy for a  
17  
18 patient’s recovery after surgery,<sup>13</sup> and is estimated when using the American College of  
19  
20 Surgeons’ Surgical Risk Calculator,<sup>14</sup> but this does not account for readmissions or early  
21  
22 deaths, although the latter collects and reports some of this information.<sup>15</sup>  
23  
24  
25  
26  
27

28  
29 Our own work and that of others have shown that early return home after surgery,<sup>6 16-18</sup> and  
30  
31 medical illnesses such as stroke,<sup>19 20</sup> is highly valued by patients but could be undermined if  
32  
33 the patient were to be transferred to another type of nursing facility. A more favourable  
34  
35 perioperative outcome measure should account for both the initial hospital stay associated  
36  
37 with the index surgery, rehospitalisation due to post-discharge complications, discharge to  
38  
39 institutional care, and early deaths.  
40  
41  
42  
43  
44

45  
46 We thus chose to evaluate the utility of “days (alive and) at home” within 30 days of surgery  
47  
48 (DAH<sub>30</sub>) in the surgical/perioperative setting as a patient-centred outcome measure for  
49  
50 perioperative clinical trials and quality improvement activities. Our hypothesis was that  
51  
52 DAH<sub>30</sub> would be lower in higher risk patients, those undergoing more extensive surgery, and  
53  
54 in those with complications after surgery (i.e. it has construct validity).  
55  
56  
57  
58  
59  
60

## Methods

This manuscript was written in adherence to the Strengthening The Reporting of Observational Studies in Epidemiology (STROBE) statement.<sup>21</sup>

### Study Design and Data Sources

Data were obtained from each of seven recently completed clinical trials that prospectively enrolled patients undergoing various types of elective and emergency surgery at the Alfred Hospital in Melbourne, Australia. The cohort consisted of four multicentre randomised trials and three before-and-after studies (see Table S1 in the Supplementary Appendix).<sup>22-29</sup> For each trial we collected a comparable set of patient demographic and perioperative characteristics, and clinical outcome measures, including complete hospital discharge, discharge destination (home, rehabilitation facility, nursing home) and re-admission data. All but one study<sup>28</sup> prospectively recorded re-admission data; for the latter study we could obtain this information retrospectively from our hospital information system. Both the present study and each of the original trials received institutional ethics committee approval.

### Patients

Patients 18 years and older undergoing an elective or non-elective inpatient operation enrolled in one of the aforementioned trials were included. Study inclusion criteria were established for the original studies and typically identified those at increased risk of postoperative complications. In all cases patients provided informed consent before enrolment in the original trials.



### *Patient involvement*

Hospital patients have previously indicated the importance of returning home after hospitalisation for medical or surgical conditions,<sup>6 16-20</sup> but we did not involve patients or their carers in the design or conduct of this study.

### **Risk Factors and Outcomes**

Perioperative data included patient demographics, comorbidity, functional status, type and duration of surgery, hospital length of stay, hospital readmission(s), and in all but one study<sup>28</sup> we prospectively collected selected complications at 30 days after surgery: wound infection, myocardial infarction, stroke, pulmonary embolism, cardiac arrest, and death.

Hospital discharge data were used to calculate hospital length of stay. Whether the patient was discharged from hospital to their home or to a nursing facility was obtained from the electronic medical record, but for those admitted to a rehabilitation facility we were unable to ascertain the number of days admitted before eventual discharge home. For those readmitted to hospital we combined the original length of stay with subsequent hospital stay(s) to calculate total length of stay within 30 days postoperatively.

DAH<sub>30</sub> was calculated using mortality and hospitalisation data from the date of the index surgery (Day 0). For example, if a patient died on day 2 after their surgery, they were assigned 0 DAH<sub>30</sub>, if a patient was discharged from hospital on Day 6 after surgery but was subsequently readmitted for 4 days before their second hospital discharge, then they were assigned 20 DAH<sub>30</sub>. If a patient died within 30 days of surgery, irrespective of whether they

1  
2  
3 had spent some time at home, DAH<sub>30</sub> was scored as zero (0). Further explanation is provided  
4  
5 in the Supplementary Appendix.  
6  
7

8  
9  
10 Patients are commonly admitted to a post-acute hospital rehabilitation centre after lower  
11  
12 limb arthroplasty and cardiac surgery in our setting; some frail and elderly patients are also  
13  
14 transferred for ongoing convalescence. We were unable to reliably collect secondary length  
15  
16 of stay for rehabilitation facilities - we thus did two secondary analysis, assuming the length  
17  
18 of stay in a rehabilitation facility was 5 or 14 extra days. That is, DAH<sub>30-rehab5</sub> was calculated  
19  
20 as DAH<sub>30-5</sub>, and DAH<sub>30-rehab14</sub> was calculated as DAH<sub>30-14</sub>, in secondary analyses.  
21  
22  
23

24  
25  
26 For the multicentre trials,<sup>22-24</sup> a 12-lead electrocardiograph was recorded preoperatively and  
27  
28 on day 1 and 3 after surgery. Blood for troponin (or if unavailable, creatine kinase-  
29  
30 myocardial band) measurement was collected at 6 to 12 hours after surgery and on the first  
31  
32 three postoperative days. In all trials laboratory tests were otherwise ordered if clinically  
33  
34 indicated. Each complication was defined within the original study protocol and in all cases a  
35  
36 consistent definition was used. In brief, surgical site infection was confirmed if associated  
37  
38 with purulent discharge, with or without a positive microbial culture; or pathogenic  
39  
40 organisms isolated from aseptically obtained microbial culture,<sup>30</sup> although the most recent  
41  
42 trial<sup>27</sup> included documentation of a physician's diagnosis in this definition.<sup>31</sup> Pneumonia was  
43  
44 confirmed by a new pulmonary infiltrate reported by chest x-ray or computerized tomo-  
45  
46 graphy, in association with at least one of: temperature >38°C, white cell count >12,000/ml,  
47  
48 or positive sputum culture that was not heavily contaminated with oral flora or that  
49  
50 corresponded with positive blood cultures. Myocardial infarction was defined according to  
51  
52 the third universal definition,<sup>32</sup> requiring elevated cardiac biomarker plus at least one of the  
53  
54  
55  
56  
57  
58  
59  
60

1  
2  
3 following: (i) ischaemic symptoms, (ii) pathological Q waves, (iii) electrocardiographic  
4  
5 changes indicative of ischemia, (iv) coronary artery intervention or (v) new wall motion  
6  
7 abnormality on echocardiography or scanning; or autopsy finding of myocardial infarction.  
8  
9  
10 The threshold for significant elevated troponin was the hospital laboratory's 99th percentile  
11  
12 of a normal reference population (upper reference limit), according to recent  
13  
14 recommendations.<sup>33</sup> Stroke was confirmed if a new neurological deficit persisting for at  
15  
16 least 24 hours, verified by neurologist assessment and/or computerized tomography or  
17  
18 magnetic resonance imaging.  
19  
20  
21  
22  
23

### 24 **Statistical Analysis**<sup>34 35</sup>

25  
26 Data were first merged and checked for inconsistencies. Patient age was grouped into 10-  
27  
28 year categories, and hourly cut-points for duration of surgery (2, 3, and 4 h) were created to  
29  
30 generate approximately similar group sizes and facilitate clinical interpretation. DAH<sub>30</sub> was  
31  
32 analysed using quantile regression.<sup>36</sup> This approach, well known in econometrics where it  
33  
34 was initially introduced, allows the modelling of any quantile of a continuous endpoint, here  
35  
36 DAH<sub>30</sub>, as a linear combination of the covariates. As DAH<sub>30</sub> is left skewed with a spike at  
37  
38 zero, it is more relevant to model the median (or alternatively, the 75<sup>th</sup> percentile) that is  
39  
40 closer to the major distribution mode and directly interpretable. The choice of the  
41  
42 quantile(s) to be analysed can be prespecified or a range of values selected for their  
43  
44 meaningfulness or exploratory purposes. Here the range 50<sup>th</sup>-75<sup>th</sup> percentile was deemed  
45  
46 relevant. No assumption on the true distribution of the endpoint is required. The asymptotic  
47  
48 distribution of the parameter estimates can be derived but depends on some unknown  
49  
50 density estimate. In general, resampling methods are recommended to obtain confidence  
51  
52 intervals (CIs).<sup>37 38</sup> Raw and adjusted medians and their 95% CIs obtained by bootstrapping  
53  
54  
55  
56  
57  
58  
59  
60

1  
2  
3 as implemented in Stata with 1000 replicates were reported for key predictors. The adjusted  
4  
5 models included age by 10-year categories, sex, American Society of Anesthesiologists (ASA)  
6  
7 physical status score, surgery time (< 2h, 2.0 - 2.99, 3.0 -3.99, ≥4.0). A goodness of fit test<sup>39</sup>  
8  
9 comparing this model to the full model including the same predictors plus smoking, heart  
10  
11 failure and diabetes was not any better (P=0.36). A global test of effect of any key predictor  
12  
13 was carried out using a quasi-likelihood ratio test.<sup>39</sup> Quantile regression was also used to  
14  
15 test median differences between those with and without complications, and by  
16  
17 postoperative complications. Supplementary analyses were done for the 75<sup>th</sup> percentile  
18  
19 (Q3). All analyses were done using Stata 14.0 except the quasi-likelihood ratio test analysis  
20  
21 that is only available in SAS. All tests were two-sided and performed at level  $\alpha=0.05$ ; no  
22  
23 correction was made for multiple comparisons.  
24  
25  
26  
27  
28  
29  
30  
31  
32

### 33 Results

34  
35  
36 A total of 2109 eligible patients 18 years and older were enrolled into clinical trials and  
37  
38 underwent inpatient operations at the Alfred Hospital between March 2006 and September  
39  
40 2016. The number of patients enrolled in each of the trials is detailed in the Supplement  
41  
42 (Supplementary Table 1). The cohort included 1427 male patients (67.7%) with a mean (SD)  
43  
44 age of 65 (12) years who underwent a range of inpatient operations (Table 1). Most  
45  
46 operations were cardiac surgical procedures (679 [32.2%]), followed by general (489  
47  
48 [23.2%]), urologic (315 [14.9%]), and neurosurgical procedures (220 [10.4%]).  
49  
50  
51  
52  
53  
54

55 There was a bimodal, skewed distribution of DAH<sub>30</sub> (Figure 1). The spike at zero consisted of  
56  
57 19 patients (1.0%) that died, and 40 patients remaining in hospital at least 30 days after  
58  
59  
60

1  
2  
3 surgery. DAH<sub>30</sub> and rates of admission to a rehabilitation centre varied according to type of  
4  
5 surgery (Table 2).  
6  
7  
8  
9

10  
11 One or more complications occurred in 263 (14.2%) patients. Overall, 245 (11.6%) patients  
12  
13 were admitted to a rehabilitation facility and 150 (7.1%) were readmitted within 30 days of  
14  
15 surgery. The median DAH<sub>30</sub> was 23.7 (95% CI, 23.5 to 24.0), but this varied according to type  
16  
17 of surgery (Table 1).  
18  
19  
20  
21  
22

23  
24 The median DAH<sub>30</sub> was significantly less in older patients, current smokers, diabetics, those  
25  
26 with poorer physical functioning, and undergoing longer operations (Table 2). These  
27  
28 associations remained after adjustment for all of these covariates and patient sex (Table 2).  
29  
30 The individual complications of myocardial infarction, stroke, pulmonary embolism, and  
31  
32 surgical site infection were each associated with shorter DAH<sub>30</sub> (Table 3) in a raw analysis.  
33  
34 Hospital readmission was also a factor, decreasing median DAH<sub>30</sub> when compared with  
35  
36 those not readmitted to hospital, 17.9 (95% CI, 16.3 to 19.5) vs 23.9 (95% CI, 23.8 to 23.9),  
37  
38 respectively (P<0.0001).  
39  
40  
41  
42  
43  
44

45  
46 After adjusting for patient age, sex, ASA physical status and duration of surgery, the  
47  
48 occurrence of any postoperative complication was associated with fewer days at home after  
49  
50 surgery (difference 3.0 [95% CI, 2.1 to 4.0] days; P<0.0001).  
51  
52  
53

#### 54 **Supplementary Analyses**

55  
56  
57  
58  
59  
60

1  
2  
3 The above findings were consistent when analysing the 3<sup>rd</sup> quartile distributions and  
4 differences (Tables S2-S4 in the Supplementary Appendix), and after accounting for the  
5 additional loss of days at home because of admission to a rehabilitation centre (Tables S5 –  
6 S9 in the Supplementary Appendix).  
7  
8  
9  
10  
11  
12

### 13 14 15 **Discussion**

16  
17 We found that DAH<sub>30</sub> has construct validity and is a readily-obtainable patient-centred  
18 outcome measure that could be used to better inform patients and physicians when  
19 planning surgery. Unlike previous related measures, DAH<sub>30</sub> accounts for each of delayed  
20 hospital discharge because of postoperative complications, discharge to a rehabilitation  
21 centre or other post-acute care nursing facility, rehospitalisations, and postoperative  
22 deaths. It thus captures much of the surgical experience, integrating efficacy, quality and  
23 safety, and thus reflecting value-based care. It can also be risk-adjusted for bench-marking  
24 purposes. DAH<sub>30</sub> will be maximized when patients recover free of complications after  
25 surgery, with optimal comfort and functioning - aligning with patient values and  
26 preferences, and goals for health care.<sup>4</sup>  
27  
28  
29  
30  
31  
32  
33  
34  
35  
36  
37  
38  
39  
40  
41  
42

43 Although concerns are frequently raised about the usefulness of hospital length of stay as  
44 an outcome measure after surgery, largely because of social factors and reluctance to  
45 discharge on weekends, it mostly adds variance (background noise) in clinical trials and is  
46 not biased. Hospital stay is a reasonable surrogate for quality and speed of recovery after  
47 surgery,<sup>13 40-42</sup> and it has marked resource/cost implications. Most patients want to go home  
48 as soon as possible – it is a desired outcome in and of itself.  
49  
50  
51  
52  
53  
54  
55  
56  
57  
58  
59  
60

1  
2  
3 The US has a triple aim of improving the healthcare system: improving the patient  
4 experience of care, improving the health of populations, and reducing per capita costs of  
5 healthcare.<sup>43</sup> DAH<sub>30</sub> seems to be useful, generic metric in this regard.<sup>44</sup> DAH<sub>30</sub> is a measure  
6 of the overall burden of care, both in hospital and post-discharge. The perceived success of  
7 a hospital discharge plan as perceived by the patient and their principal carer depends on  
8 clear communication and meeting expectations.<sup>45</sup> DAH<sub>30</sub> offers transparency and  
9 opportunities for benchmarking performance, both of which are important components of  
10 quality improvement.<sup>13</sup> It may influence alternative payment contracts for hospitals.  
11  
12  
13  
14  
15  
16  
17  
18  
19  
20  
21  
22  
23

24 Postoperative complications add to hospital costs and increase length of stay.<sup>46</sup> Higher  
25 episode payments at “lower-quality” hospitals have been attributed to higher rates of  
26 complications, 30-day readmissions, and post-discharge ancillary care.<sup>46</sup> Serious  
27 postoperative complications are both strongly associated with readmission,<sup>5 17</sup> increasing  
28 the risk by 6.7-fold, and loss of independence.<sup>5</sup> Readmission is a frequent, costly, and  
29 sometimes life-threatening event that is associated with gaps in follow-up care.<sup>15 17 47</sup>  
30 Readmission after surgery is thus an established quality indicator. Trends in readmissions  
31 suggest that US hospitals are responding to incentives to reduce readmissions under the  
32 Affordable Care Act.<sup>48 49</sup> Hospital readmission rates are not highly correlated with mortality  
33 rates,<sup>50</sup> so they offer an independent and more sensitive measure of quality. Even though  
34 some readmissions are due to chronic medical conditions,<sup>47</sup> optimal perioperative care  
35 should keep these to a minimum and such improvements should be reflected in more  
36 DAH<sub>30</sub>.  
37  
38  
39  
40  
41  
42  
43  
44  
45  
46  
47  
48  
49  
50  
51  
52  
53  
54  
55  
56  
57  
58  
59  
60

1  
2  
3 Enhanced recovery after surgery programs are designed to reduce complications and  
4  
5 shorten length of stay. But this sometimes comes at the cost of increased hospital re-  
6  
7 admissions.<sup>51 52</sup> The measurement and reporting of DAH<sub>30</sub> would identify this and hopefully  
8  
9 encourage further quality improvement. Planned discharge to a rehabilitation facility  
10  
11 sometimes forms part of an enhanced recovery pathway, and in any case may not be seen  
12  
13 by the patient or their family as indicating a poor outcome. Therefore, calculation of DAH<sub>30</sub>  
14  
15 in some studies could incorporate days spent in a rehabilitation facility as equivalent to  
16  
17 being home. In contrast, unplanned admission to a rehabilitation facility would indicate  
18  
19 poor care or adverse outcome, and this should be retained in the calculation of DAH<sub>30</sub>. Care  
20  
21 should be taken to avoid missing out-of-network hospitalizations, particularly if relying on  
22  
23 hospital system electronic medical records. The latter will otherwise enhance the efficiency  
24  
25 of data collection.  
26  
27  
28  
29  
30  
31  
32

33 Composite endpoints used in perioperative trials are often flawed,<sup>53-55</sup> typically used to  
34  
35 increase the number of events in order to enhance statistical power. DAH<sub>30</sub>, as a numerical  
36  
37 patient-centred measure, provides more statistical power, can be reliably measured and has  
38  
39 direct patient-centredness. Although some postoperative complications and poor survival  
40  
41 can manifest many months after surgery in those recovering from major surgery or critical  
42  
43 illness,<sup>29 56 57</sup> extending measurement out to 90 days after surgery (i.e. DAH<sub>90</sub>) may not  
44  
45 necessarily provide new or different information because the extra burden and costs of  
46  
47 further data collection may outweigh the benefits of the extra information obtained. In  
48  
49 addition, disease progression or other aspects of life may confound outcome evaluation of  
50  
51 perioperative care.  
52  
53  
54  
55  
56  
57  
58  
59  
60



1  
2  
3 Our study has several limitations. First, this was a single-centre study of clinical trial data  
4 collected for other purposes. Second, postoperative in-hospital deaths have a major  
5 influence on the calculation of DAH<sub>30</sub>; this is arguably appropriate because perioperative  
6 studies should weight this as the most extreme adverse outcome. More sophisticated  
7 modelling could jointly model the risk of death and DAH<sub>30</sub> in those discharged alive, and such  
8 modelling would be particularly important if the in-hospital mortality rate is moderate or greater.  
9  
10 Third, different health care settings can be expected to have varied casemix and hospital  
11 discharge processes, and hospital discharge may be delayed because of social and process  
12 issues unrelated to complications or quality of care. DAH<sub>30</sub> should therefore be risk-  
13 adjusted.<sup>58</sup> Fourth, DAH<sub>30</sub> doesn't provide specific information on which aspects of in-  
14 hospital or post-discharge management influences where patients reside after  
15 hospitalization, or the post-discharge use and effectiveness of family physician or other  
16 health care resources. Fifth, DAH<sub>30</sub> is an overall measure of recovery profile and does not  
17 inform us about specific complications, level of functioning or wellbeing. Such aspects  
18 should also be included when conducting outcome studies. Sixth, obtaining accurate data on  
19 days spent in a rehabilitation facility relies on further follow-up or accurate electronic  
20 records. Future studies using DAH<sub>30</sub> should prospectively plan to reliably obtain such data.  
21  
22  
23  
24  
25  
26  
27  
28  
29  
30  
31  
32  
33  
34  
35  
36  
37  
38  
39  
40  
41  
42  
43  
44

## 45 CONCLUSIONS

46 DAH<sub>30</sub> has construct validity and is a readily-obtainable, generic, patient-centred outcome  
47 measure that can better inform patients and physicians when planning surgery. It is a  
48 suitable outcome measure for both quality improvement and perioperative clinical trials.  
49  
50 DAH<sub>30</sub> accounts for prolonged hospital stay, discharge to any post-acute care nursing facility,  
51  
52  
53  
54  
55  
56  
57  
58  
59  
60

1  
2  
3 rehospitalizations, and early deaths. It thus captures much of the patient-centred  
4  
5  
6 experience, and will be maximal when effective and efficient care is achieved.  
7  
8  
9  
10  
11  
12  
13  
14  
15  
16  
17  
18  
19  
20  
21  
22  
23  
24  
25  
26  
27  
28  
29  
30  
31  
32  
33  
34  
35  
36  
37  
38  
39  
40  
41  
42  
43  
44  
45  
46  
47  
48  
49  
50  
51  
52  
53  
54  
55  
56  
57  
58  
59  
60

1  
2  
3 **Contributor statement:** PM designed the study, oversaw the ethics application, devised the  
4  
5 statistical analysis plan, and drafted and revised the paper. He is guarantor. MS provided  
6  
7 intellectual input into the study design, and drafted and revised the paper. SH analysed the  
8  
9 data and drafted and revised the paper. SW prepared the ethics application, monitored the  
10  
11 data entry and checking, and drafted and revised the paper. DM provided intellectual input  
12  
13 into the study design, and drafted and revised the paper. SM provided intellectual input into  
14  
15 the study design, and drafted and revised the paper. IS retrieved and entered all study data,  
16  
17 and revised the paper. AF contributed to the statistical analysis, and drafted and revised the  
18  
19 paper.  
20  
21  
22  
23  
24  
25  
26

27 **Transparency declaration:** The lead author\* affirms that this manuscript is an honest,  
28  
29 accurate, and transparent account of the study being reported; that no important aspects of  
30  
31 the study have been omitted; and that any discrepancies from the study as planned have  
32  
33 been explained.  
34  
35  
36  
37  
38  
39

40 **Acknowledgment:** The authors would like to thank the study participants for their interest  
41  
42 and preparedness to consent to the original trials. PM is supported in part by Practitioner  
43  
44 Fellowships from the Australian National Health and Medical Research Council (NHMRC).  
45  
46  
47  
48  
49

50 **Funding:** This work was supported by the Australian NHMRC, the New Zealand Health  
51  
52 Research Council, and the Australian and New Zealand College of Anaesthetists, and  
53  
54 Monash University (Melbourne, Australia).  
55  
56  
57  
58  
59  
60

1  
2  
3  
4  
5 **Additional data:** No additional data available.  
6  
7

8 **Competing interests:** None of the authors have any conflicts of interest  
9

10 **Ethics approval:** This trial has been approved by the Ethics Committees of Alfred Health,  
11  
12 Melbourne, Australia.  
13  
14  
15  
16  
17  
18  
19  
20  
21  
22  
23  
24  
25  
26  
27  
28  
29  
30  
31  
32  
33  
34  
35  
36  
37  
38  
39  
40  
41  
42  
43  
44  
45  
46  
47  
48  
49  
50  
51  
52  
53  
54  
55  
56  
57  
58  
59  
60

## References

1. Austin JM, McGlynn EA, Pronovost PJ. Fostering Transparency in Outcomes, Quality, Safety, and Costs. *Jama* 2016 doi: 10.1001/jama.2016.14039 [published Online First: 2016/09/27]
2. Lynn J, McKethan A, Jha AK. Value-Based Payments Require Valuing What Matters to Patients. *JAMA* 2015;314(14):1445-6. doi: 10.1001/jama.2015.8909
3. Porter ME. What is value in health care? *N Engl J Med* 2010;363(26):2477-81. doi: 10.1056/NEJMp1011024 [published Online First: 2010/12/15]
4. Lavalley DC, Chenok KE, Love RM, et al. Incorporating Patient-Reported Outcomes Into Health Care To Engage Patients And Enhance Care. *Health Aff (Millwood)* 2016;35(4):575-82. doi: 10.1377/hlthaff.2015.1362 [published Online First: 2016/04/06]
5. Berian JR, Mohanty S, Ko CY, et al. Association of Loss of Independence With Readmission and Death After Discharge in Older Patients After Surgical Procedures. *JAMA Surg* 2016;151(9):e161689. doi: 10.1001/jamasurg.2016.1689 [published Online First: 2016/07/14]
6. Fried TR, Bradley EH, Towle VR, et al. Understanding the treatment preferences of seriously ill patients. *N Engl J Med* 2002;346(14):1061-6. doi: 10.1056/NEJMsa012528
7. Goldfarb M, Drudi L, Almohammadi M, et al. Outcome Reporting in Cardiac Surgery Trials: Systematic Review and Critical Appraisal. *J Am Heart Assoc* 2015;4(8):e002204. doi: 10.1161/jaha.115.002204 [published Online First: 2015/08/19]
8. Chalmers I, Clarke M. Outcomes that matter to patients in tombstone trials. *Lancet* 2001;358(9293):1649. doi: S0140673601066892 [pii] [published Online First: 2001/11/22]
9. Ariti CA, Cleland JG, Pocock SJ, et al. Days alive and out of hospital and the patient journey in patients with heart failure: Insights from the candesartan in heart failure: assessment of reduction in mortality and morbidity (CHARM) program. *Am Heart J* 2011;162(5):900-6. doi: 10.1016/j.ahj.2011.08.003
10. Wasywich CA, Gamble GD, Whalley GA, et al. Understanding changing patterns of survival and hospitalization for heart failure over two decades in New Zealand: utility of 'days alive and out of hospital' from epidemiological data. *Eur J Heart Fail* 2010;12(5):462-8. doi: 10.1093/eurjhf/hfq027
11. Xian Y, Wu J, O'Brien EC, et al. Real world effectiveness of warfarin among ischemic stroke patients with atrial fibrillation: observational analysis from Patient-Centered Research into Outcomes Stroke Patients Prefer and Effectiveness Research (PROSPER) study. *BMJ* 2015;351:h3786. doi: 10.1136/bmj.h3786
12. Ellis G, Whitehead MA, Robinson D, et al. Comprehensive geriatric assessment for older adults admitted to hospital: meta-analysis of randomised controlled trials. *Bmj* 2011;343:d6553. doi: 10.1136/bmj.d6553 [published Online First: 2011/10/29]
13. Hyder JA, Hirschberg RE, Nguyen LL. Home discharge as a performance metric for surgery. *JAMA Surg* 2015;150(2):96-7. doi: 10.1001/jamasurg.2014.1725 [published Online First: 2014/12/05]
14. Hyder JA, Wakeam E, Habermann EB, et al. Derivation and validation of a simple calculator to predict home discharge after surgery. *J Am Coll Surg* 2014;218(2):226-36. doi: 10.1016/j.jamcollsurg.2013.11.002
15. Merkow RP, Ju MH, Chung JW, et al. Underlying reasons associated with hospital readmission following surgery in the United States. *JAMA* 2015;313(5):483-95. doi: 10.1001/jama.2014.18614
16. Boney O, Bell M, Bell N, et al. Identifying research priorities in anaesthesia and perioperative care: final report of the joint National Institute of Academic Anaesthesia/James Lind Alliance Research Priority Setting Partnership. *BMJ Open* 2015;5(12):e010006. doi: 10.1136/bmjopen-2015-010006 [published Online First: 2015/12/18]
17. Hinami K, Bilimoria KY, Kallas PG, et al. Patient experiences after hospitalizations for elective surgery. *Am J Surg* 2014;207(6):855-62. doi: 10.1016/j.amjsurg.2013.04.014

- 1  
2  
3 18. Burns KE, Jacob SK, Aguirre V, et al. Stakeholder Engagement in Trial Design: Survey of Visitors to  
4 Critically Ill Patients Regarding Preferences for Outcomes and Treatment Options during  
5 Weaning from Mechanical Ventilation. *Ann Am Thorac Soc* 2016;13(11):1962-68. doi:  
6 10.1513/AnnalsATS.201606-445OC [published Online First: 2016/09/07]  
7  
8 19. Hannah D, Lindholm B, Maisch L. Certain uncertainty: life after stroke from the patient's  
9 perspective. *Circ Cardiovasc Qual Outcomes* 2014;7(6):968-9. doi:  
10 10.1161/CIRCOUTCOMES.114.001315  
11  
12 20. Xian Y, O'Brien EC, Fonarow GC, et al. Patient-Centered Research into Outcomes Stroke Patients  
13 Prefer and Effectiveness Research: Implementing the patient-driven research paradigm to  
14 aid decision making in stroke care. *Am Heart J* 2015;170(1):36-45, 45.e1-11. doi:  
15 10.1016/j.ahj.2015.04.008 [published Online First: 2015/06/22]  
16  
17 21. von Elm E, Altman DG, Egger M, et al. The Strengthening the Reporting of Observational Studies  
18 in Epidemiology (STROBE) statement: guidelines for reporting observational studies. *Lancet*  
19 2007;370(9596):1453-7. doi: 10.1016/S0140-6736(07)61602-X  
20  
21 22. Myles PS, Leslie K, Chan MT, et al. The safety of addition of nitrous oxide to general anaesthesia  
22 in at-risk patients having major non-cardiac surgery (ENIGMA-II): a randomised, single-blind  
23 trial. *Lancet* 2014;384(9952):1446-54. doi: 10.1016/s0140-6736(14)60893-x [published  
24 Online First: 2014/08/22]  
25  
26 23. Myles PS, Smith JA, Forbes A, et al. Stopping vs. Continuing Aspirin before Coronary Artery  
27 Surgery. *N Engl J Med* 2016;374(8):728-37. doi: 10.1056/NEJMoa1507688  
28  
29 24. Myles PS, Smith JA, Forbes A, et al. Tranexamic acid in coronary artery surgery. *N Engl J Med*  
30 2017;2017(376):136-48.  
31  
32 25. Thompson EG, Gower ST, Beilby DS, et al. Enhanced recovery after surgery program for elective  
33 abdominal surgery at three Victorian hospitals. *Anaesth Intensive Care* 2012;40(3):450-9.  
34 [published Online First: 2012/05/15]  
35  
36 26. Christelis N, Wallace S, Sage CE, et al. An enhanced recovery after surgery program for hip and  
37 knee arthroplasty. *Med J Aust* 2015;202(7):363-8.  
38  
39 27. Glassford NJ, Myles P, Bellomo R. The Australian approach to peri-operative fluid balance. *Curr*  
40 *Opin Anaesthesiol* 2012;25(1):102-10. doi: 10.1097/ACO.0b013e32834decd7 [published  
41 Online First: 2011/11/25]  
42  
43 28. Vijay A, Grover A, Coulson T, et al. Perioperative management of patients treated with  
44 angiotensin-converting enzyme inhibitors and angiotensin II receptor blockers. *Anaesth*  
45 *Intensive Care* 2016;in press  
46  
47 29. Shulman MA, Myles PS, Chan MT, et al. Measurement of disability-free survival after surgery.  
48 *Anesthesiology* 2015;122(3):524-36. doi: 10.1097/ALN.0000000000000586  
49  
50 30. Mangram A, Horan T, Pearson M, et al. Guideline for prevention of surgical site infection, 1999.  
51 *Infection Control and Hospital Epidemiology* 1999;20:247-77.  
52  
53 31. Degnim AC, Throckmorton AD, Boostrom SY, et al. Surgical site infection after breast surgery:  
54 impact of 2010 CDC reporting guidelines. *Ann Surg Oncol* 2012;19(13):4099-103. doi:  
55 10.1245/s10434-012-2448-6  
56  
57 32. Thygesen K, Alpert JS, Jaffe AS, et al. Third universal definition of myocardial infarction.  
58 *Circulation* 2012;126(16):2020-35. doi: 10.1161/CIR.0b013e31826e1058  
59  
60 CIR.0b013e31826e1058 [pii] [published Online First: 2012/08/28]  
33. Leonardi S, Armstrong PW, Schulte PJ, et al. Implementation of standardized assessment and  
reporting of myocardial infarction in contemporary randomized controlled trials: a  
systematic review. *Eur Heart J* 2013;34(12):894-902d. doi: 10.1093/eurheartj/eht003  
eht003 [pii] [published Online First: 2013/01/29]  
34. WMA Declaration of Helsinki - Ethical Principles for Medical Research Involving Human Subjects.  
Available from [www.wma.net/en/30publications/10policies/b3/index.html](http://www.wma.net/en/30publications/10policies/b3/index.html) (accessed 17  
October 2012).

- 1  
2  
3 35. Caironi P, Tognoni G, Masson S, Fumagalli R, Persenti A, Romero M, et al. Albumin replacement  
4 in patients with severe sepsis or septic shock. *N Engl J Med*. 2014. doi:  
5 10.1056/NEJMoa1305727.  
6  
7 36. Koenker R, Bassett G. Regression quantiles. *Econometrica* 1978;46:33–50.  
8  
9 37. Wu CFJ. Jackknife, bootstrap and other resampling methods in regression analysis. *Ann Stat*  
10 1986;14:1261-350.  
11  
12 38. He X, Hu F. Markov chain marginal bootstrap. *J Am Stat Assoc* 2002;97:783-95.  
13  
14 39. Koenker R, Machado JAF. Goodness of fit and related inference processes for quantile  
15 regression. *Journal of the American Statistical Association* 1999;94:1296–310.  
16  
17 40. Gornall BF, Myles PS, Smith CL, et al. Measurement of quality of recovery using the QoR-40: a  
18 quantitative systematic review. *Br J Anaesth* 2013;111(2):161-9. doi: 10.1093/bja/aet014  
19  
20 aet014 [pii] [published Online First: 2013/03/09]  
21  
22 41. Liu VX, Rosas E, Hwang J, et al. Enhanced Recovery After Surgery Program Implementation in 2  
23 Surgical Populations in an Integrated Health Care Delivery System. *JAMA Surg*  
24 2017:e171032. doi: 10.1001/jamasurg.2017.1032 [published Online First: 2017/05/12]  
25  
26 42. Yadla S, Ghobrial GM, Campbell PG, et al. Identification of complications that have a significant  
27 effect on length of stay after spine surgery and predictive value of 90-day readmission rate. *J*  
28 *Neurosurg Spine* 2015;23(6):807-11. doi: 10.3171/2015.3.spine14318 [published Online  
29 First: 2015/09/01]  
30  
31 43. Berwick DM, Nolan TW, Whittington J. The triple aim: care, health, and cost. *Health Aff*  
32 *(Millwood)* 2008;27(3):759-69. doi: 10.1377/hlthaff.27.3.759  
33  
34 44. Lee VS, Kawamoto K, Hess R, et al. Implementation of a Value-Driven Outcomes Program to  
35 Identify High Variability in Clinical Costs and Outcomes and Association With Reduced Cost  
36 and Improved Quality. *Jama* 2016;316(10):1061-72. doi: 10.1001/jama.2016.12226  
37 [published Online First: 2016/09/14]  
38  
39 45. Bauer M, Fitzgerald L, Haesler E, et al. Hospital discharge planning for frail older people and their  
40 family. Are we delivering best practice? A review of the evidence. *J Clin Nurs*  
41 2009;18(18):2539-46. doi: 10.1111/j.1365-2702.2008.02685.x [published Online First:  
42 2009/04/21]  
43  
44 46. Birkmeyer JD, Gust C, Dimick JB, et al. Hospital quality and the cost of inpatient surgery in the  
45 United States. *Ann Surg* 2012;255(1):1-5. doi: 10.1097/SLA.0b013e3182402c17  
46  
47 47. Jencks SF, Williams MV, Coleman EA. Rehospitalizations among patients in the Medicare fee-for-  
48 service program. *N Engl J Med* 2009;360(14):1418-28. doi: 10.1056/NEJMsa0803563  
49  
50 48. Zuckerman RB, Sheingold SH, Orav EJ, et al. Readmissions, Observation, and the Hospital  
51 Readmissions Reduction Program. *N Engl J Med* 2016;374(16):1543-51. doi:  
52 10.1056/NEJMsa1513024  
53  
54 49. Danino JF, Taylor T, Metcalfe CW, et al. Readmission rates and financial penalties after ear, nose  
55 and throat surgery: how can we improve? *Br J Hosp Med (Lond)* 2015;76(11):655-7. doi:  
56 10.12968/hmed.2015.76.11.655  
57  
58 50. Hannan EL, Zhong Y, Lahey SJ, et al. 30-Day Readmissions After Coronary Artery Bypass Graft  
59 Surgery in New York State. *JACC: Cardiovascular Interventions* 2011;4(5):569-76. doi:  
60 <http://dx.doi.org/10.1016/j.jcin.2011.01.010>  
51  
52 51. Ahmed J, Khan S, Lim M, et al. Enhanced recovery after surgery protocols - compliance and  
53 variations in practice during routine colorectal surgery. *Colorectal Dis* 2012;14(9):1045-51.  
54 doi: 10.1111/j.1463-1318.2011.02856.x [published Online First: 2011/10/12]  
55  
56 52. Group EC. The Impact of Enhanced Recovery Protocol Compliance on Elective Colorectal Cancer  
57 Resection: Results From an International Registry. *Ann Surg* 2015;261(6):1153-9. doi:  
58 10.1097/SLA.0000000000001029  
59  
60 53. Myles PS, Devereaux PJ. Pros and cons of composite endpoints in anesthesia trials.  
*Anesthesiology* 2010;113(4):776-8. doi: 10.1097/ALN.0b013e3181ee2ceb [published Online  
First: 2010/09/03]

- 1  
2  
3 54. Ferreira-Gonzalez I, Permanyer-Miralda G, Busse JW, et al. Composite outcomes can distort the  
4 nature and magnitude of treatment benefits in clinical trials. *Ann Intern Med*  
5 2009;150(8):566-7. doi: 150/8/566-b [pii] [published Online First: 2009/04/22]  
6  
7 55. Pogue J, Thabane L, Devereaux PJ, et al. Testing for heterogeneity among the components of a  
8 binary composite outcome in a clinical trial. *BMC Med Res Methodol* 2010;10:49. doi:  
9 10.1186/1471-2288-10-49  
10  
11 56. Khuri SF, Henderson WG, DePalma RG, et al. Determinants of long-term survival after major  
12 surgery and the adverse effect of postoperative complications. *Ann Surg* 2005;242(3):326-  
13 41; discussion 41-3. doi: 00000658-200509000-00004 [pii] [published Online First:  
14 2005/09/02]  
15  
16 57. Myles PS, Peyton P, Silbert B, et al. Perioperative epidural analgesia for major abdominal surgery  
17 for cancer and recurrence-free survival: randomised trial. *BMJ* 2011;342:d1491. doi:  
18 10.1136/bmj.d1491  
19  
20 bmj.d1491 [pii] [published Online First: 2011/03/31]  
21  
22 58. Sheingold SH, Zuckerman R, Shartz A. Understanding Medicare Hospital Readmission Rates  
23 And Differing Penalties Between Safety-Net And Other Hospitals. *Health Aff (Millwood)*  
24 2016;35(1):124-31. doi: 10.1377/hlthaff.2015.0534  
25  
26  
27  
28  
29  
30  
31  
32  
33  
34  
35  
36  
37  
38  
39  
40  
41  
42  
43  
44  
45  
46  
47  
48  
49  
50  
51  
52  
53  
54  
55  
56  
57  
58  
59  
60



1  
2  
3  
4  
5  
6  
7  
8  
9  
10  
11  
12  
13  
14  
15  
16  
17  
18  
19  
20  
21  
22  
23  
24  
25  
26  
27  
28  
29  
30  
31  
32  
33  
34  
35  
36  
37  
38  
39  
40  
41  
42  
43  
44  
45  
46  
47  
48  
49  
50  
51  
52  
53  
54  
55  
56  
57  
58  
59  
60

**Legend**

**Figure 1. Frequency Distribution of Days at Home up to 30 Days after Surgery (n=2109).  
The smoothing line (kernel) is a non-parametric estimate of the probability density  
function.**

For peer review only

**Table 1. Days at Home up to 30 Days after Surgery (DAH<sub>30</sub>) According to Types of Surgery.**

| Surgery                        | No. of patients | No. admitted to a rehabilitation hospital (%) | Median (95% CI) DAH <sub>30</sub> <sup>†</sup> |
|--------------------------------|-----------------|-----------------------------------------------|------------------------------------------------|
| Cardiac                        | 679             | 54 (8.0)                                      | 22.8 (22.6-22.9)                               |
| Orthopaedic                    | 289             | 122 (42)                                      | 21.9 (21.2-22.6)                               |
| Neurosurgery                   | 220             | 9 (4.0)                                       | 22.8 (22.2-23.5)                               |
| Colorectal                     | 118             | 8 (6.8)                                       | 24.9 (23.9-26.0)                               |
| Urology                        | 315             | 26 (8.3)                                      | 23.8 (23.0-24.5)                               |
| Vascular                       | 56              | 1 (1.8)                                       | 26.0 (24.3-27.3)                               |
| Ear, nose, throat              | 99              | 17 (17)                                       | 25.8 (24.9-27.0)                               |
| Oesophagogastric/hepatobiliary | 253             | 4 (1.6)                                       | 24.9 (23.8-26.1)                               |
| Thoracic                       | 28              | 2 (7.1)                                       | 22.8 (17.8-27.8)                               |
| Other                          | 52              | 2 (3.8)                                       | 28.8 (27.7-30.0)                               |

<sup>†</sup> hospital days do not include those spent in a rehabilitation facility

**Table 2. Days at Home up to 30 Days after Surgery (DAH<sub>30</sub>) According to Patient and Perioperative Characteristics.**

| Variable               | no. (%)   | Raw median DAH <sub>30</sub> (95% CI) | P value | Adjusted median DAH <sub>30</sub> (95% CI) <sup>†</sup> | P-value |
|------------------------|-----------|---------------------------------------|---------|---------------------------------------------------------|---------|
| Patient age            |           |                                       | <0.001  |                                                         | <0.001  |
| <50 years              | 220 (11)  | 24.9 (24.4 - 25.4)                    |         | 24.8 (24.4 - 25.2)                                      |         |
| 50-60 years            | 396 (19)  | 24.0 (23.4 - 24.6)                    |         | 24.4 (24.0 - 24.9)                                      |         |
| 60-70 years            | 612 (29)  | 23.9 (23.8 - 24.0)                    |         | 24.0 (23.6 - 24.3)                                      |         |
| 70-80 years            | 653 (31)  | 22.8 (22.6 - 23.0)                    |         | 23.0 (22.7 - 23.4)                                      |         |
| ≥80 years              | 228 (11)  | 22.7 (22.0 - 23.5)                    |         | 22.2 (21.7 - 22.7)                                      |         |
| Sex                    |           |                                       | 0.042   |                                                         | 0.14    |
| Male                   | 1427 (68) | 23.7 (23.1 - 24.2)                    |         | 23.7 (23.5 - 24.0)                                      |         |
| Female                 | 682 (32)  | 24.0 (23.7 - 24.2)                    |         | 23.5 (23.2 - 23.8)                                      |         |
| Smoker                 |           |                                       | 0.094   |                                                         |         |
| yes                    | 787 (37)  | 23.2 (22.6 - 23.8)                    |         | not done                                                |         |
| no                     | 1322 (63) | 23.8 (23.7 - 23.9)                    |         | not done                                                |         |
| Diabetes               |           |                                       | 0.003   |                                                         |         |
| yes                    | 697 (33)  | 23.0 (22.4 - 23.6)                    |         | not done                                                |         |
| no                     | 1412 (67) | 23.8 (23.8 - 23.9)                    |         | not done                                                |         |
| Heart failure          |           |                                       | 0.002   |                                                         |         |
| yes                    | 365 (17)  | 22.9 (22.4 - 23.4)                    |         | not done                                                |         |
| no                     | 1744 (83) | 23.8 (23.7 - 23.9)                    |         | not done                                                |         |
| ASA physical status    |           |                                       | <0.001  |                                                         | <0.001  |
| 1                      | 41 (1.9)  | 28.0 (26.3 - 29.7)                    |         | 25.9 (25.1 - 26.6)                                      |         |
| 2                      | 530 (25)  | 25.0 (24.7 - 25.3)                    |         | 24.4 (24.0 - 24.7)                                      |         |
| 3                      | 1024 (51) | 23.7 (23.1 - 24.3)                    |         | 23.6 (23.2 - 23.9)                                      |         |
| 4                      | 510 (24)  | 22.0 (21.4 - 22.5)                    |         | 23.0 (22.6 - 23.3)                                      |         |
| Duration of Surgery, h |           |                                       | <0.001  |                                                         | <0.001  |
| <2.0                   | 581 (29)  | 25.9 (25.7 - 26.1)                    |         | 25.6 (25.2 - 26.0)                                      |         |
| 2.0-2.99               | 412 (20)  | 24.0 (23.5 - 24.5)                    |         | 24.0 (23.7 - 24.3)                                      |         |
| 3.0-3.99               | 551 (26)  | 22.9 (22.8 - 23.1)                    |         | 23.1 (22.7 - 23.4)                                      |         |
| ≥4.0                   | 565 (27)  | 21.9 (21.4 - 22.3)                    |         | 22.0 (21.6 - 22.5)                                      |         |

<sup>†</sup>covariates including in the multivariable adjustment were: patient age, sex, American Society of Anesthesiologists (ASA) physical status and duration of surgery

**Table 3. Median (95% CI) Days at Home up to 30 Days after Surgery According to Postoperative Complications.**

| Variable (no. [%])                  | No. with complete data | Yes                | No                 | P value† |
|-------------------------------------|------------------------|--------------------|--------------------|----------|
| Myocardial infarction (120 [6.5])   | 1846                   | 20.8 (19.2 - 22.4) | 23.8 (23.7 - 23.9) | <0.001   |
| Stroke (13 [0.7])                   | 1846                   | 10.1 (2.5 - 17.7)  | 23.8 (23.5 - 24.0) | <0.001   |
| Pulmonary embolism (7 [0.4])        | 1846                   | 17.1 (8.4 - 25.9)  | 23.7 (23.5 - 24.0) | 0.012    |
| Cardiac arrest (3 [0.2])            | 1846                   | 17.7 (0.9 - 34.5)  | 23.7 (23.5 - 24.0) | 0.018    |
| Surgical site infection (129 [7.0]) | 1846                   | 21.0 (19.0 - 23.0) | 23.8 (23.7 - 23.9) | <0.001   |
| Any of the above (263 [14.2])       | 1846                   | 20.5 (19.1 - 21.9) | 23.9 (23.8 - 23.9) | <0.001   |
| Hospital readmission (150 [7.1])    | 2090                   | 17.9 (16.3 - 19.5) | 23.9 (23.8 - 23.9) | <0.001   |

† P values calculated using the quasi-likelihood ratio test.

1  
2  
3  
4  
5  
6  
7  
8  
9  
10  
11  
12  
13  
14  
15  
16  
17  
18  
19  
20  
21  
22  
23  
24  
25  
26  
27  
28  
29  
30  
31  
32  
33  
34  
35  
36  
37  
38  
39  
40  
41  
42  
43  
44  
45  
46  
47  
48  
49  
50  
51  
52  
53  
54  
55  
56  
57  
58  
59  
60

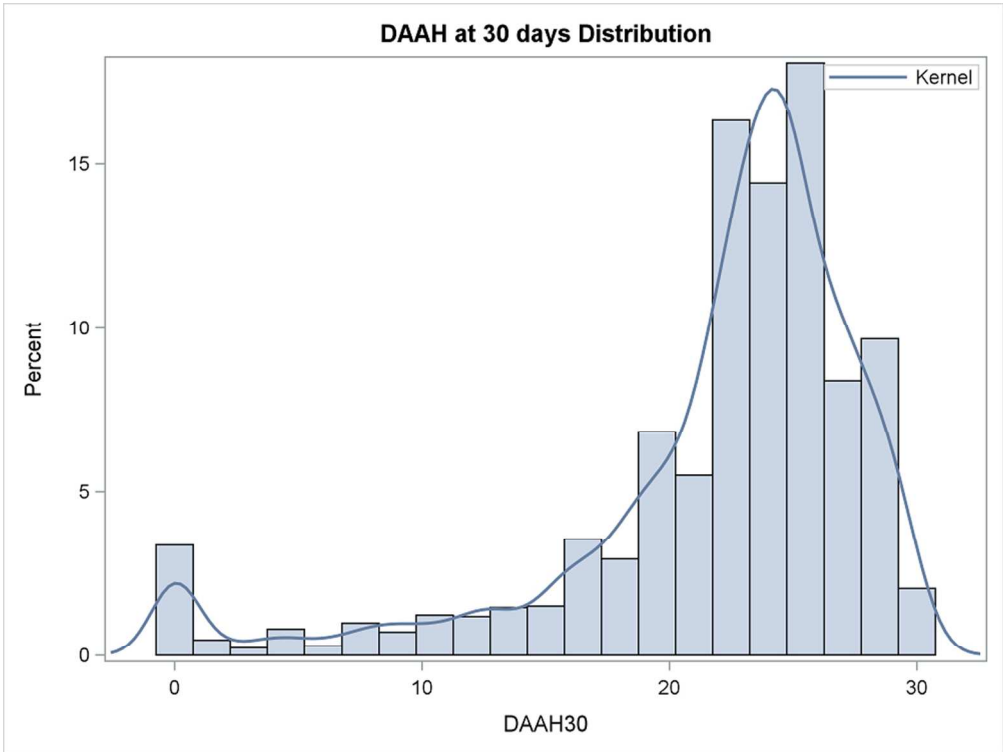

Figure 1. Frequency Distribution of Days at Home up to 30 Days after Surgery (n=2109). The smoothing line (kernel) is a non-parametric estimate of the probability density function.

84x63mm (300 x 300 DPI)

## Supplementary Appendix

This appendix has been provided by the authors to give readers additional information about their work.

Supplement to: Days Alive and at Home after Surgery

|                                                                                                                                                                                                                 | Page |
|-----------------------------------------------------------------------------------------------------------------------------------------------------------------------------------------------------------------|------|
| <b>Proposed method of calculation of “days at home within 30 days of surgery” (DAH<sub>30</sub>)</b>                                                                                                            | 2    |
| <b>Table S1.</b> Trial data sources                                                                                                                                                                             | 3    |
| <b>Figure S1.</b> The impact of the quantile (50 <sup>th</sup> – 75 <sup>th</sup> percentile) choice for DAH <sub>30</sub>                                                                                      | 4    |
| <b>Table S2.</b> Third quartile (Q3) days at home up to 30 days after surgery (DAH <sub>30</sub> ) according to patient and perioperative characteristics                                                       | 5    |
| <b>Table S3.</b> Third quartile (Q3) (95% CI) days at home up to 30 days after surgery according to postoperative complications                                                                                 | 6    |
| <b>Table S4.</b> Days at home up to 30 days after surgery (DAH <sub>30-rehab</sub> ), assuming 5 days’ admission to a rehabilitation facility if it occurred, according to types of surgery.                    | 7    |
| <b>Table S5.</b> Days at home up to 30 days after surgery (DAH <sub>30</sub> ), assuming 5 days’ admission to a rehabilitation facility if it occurred, according to patient and perioperative characteristics  | 8    |
| <b>Table S6.</b> Median (95% CI) days at home up to 30 days after surgery, assuming 5 days’ admission to a rehabilitation facility if it occurred, according to postoperative complications                     | 9    |
| <b>Table S7.</b> Days at home up to 30 days after surgery (DAH <sub>30-rehab</sub> ), assuming 14 days’ admission to a rehabilitation facility if it occurred, according to types of surgery.                   | 10   |
| <b>Table S8.</b> Days at home up to 30 days after surgery (DAH <sub>30</sub> ), assuming 14 days’ admission to a rehabilitation facility if it occurred, according to patient and perioperative characteristics | 11   |
| <b>Table S9.</b> Median (95% CI) days at home up to 30 days after surgery, assuming 14 days’ admission to a rehabilitation facility if it occurred, according to postoperative complications                    | 12   |

### Proposed Method of Calculation of “Days at Home within 30 days of Surgery” (DAH<sub>30</sub>)

DAH<sub>30</sub> is a composite measure incorporating hospital length of stay in the hospital following the index surgery, re-admission to either the index or any other hospital, and including post-acute hospital discharge to a rehabilitation centre/hospital or other nursing facility, and early deaths after surgery, into a single outcome metric.

DAH<sub>30</sub> is a numerical outcome measure that provides greater statistical power to detect clinically important differences in outcome. It is likely that a 0.5 day difference would be clinically important and valued by most people. A hospital bed day has been costed at £400 by the NHS in the UK, and \$1800 in the US. It has the potential to increase the available hospital beds by about 8%.

By its very nature, DAH<sub>30</sub> will be left-skewed with a spike at 0 (reflecting in-hospital deaths and those still admitted to hospital or other nursing facility at 30 days after surgery).

DAH<sub>30</sub> is calculated using mortality and hospitalisation data from the date of the index surgery (= Day 0). For example, if a patient died on day 2 after their surgery whilst still an inpatient, they would be assigned 0 DAH<sub>30</sub>; if a patient was discharged from hospital on Day 6 after surgery but was subsequently readmitted for 4 days before their second hospital discharge, then they would be assigned 20 DAH<sub>30</sub>. If a patient has complications and spends 16 days in hospital, and then is transferred to a nursing facility for rehabilitation, and spend 24 days there before finally being discharged to their own home, they would be assigned 0 DAH<sub>30</sub>. (30-16-24 = -10, but the minimum value of DAH<sub>30</sub> should be zero\*).

Patients having a planned re-admission (eg. removal of a stent or secondary closure of a fistula) within 30 days of surgery should have these days subtracted from the total DAH<sub>30</sub>. That is, if a patient is discharged from hospital on Day 13, and is electively re-admitted two weeks later (Day 27) for a further 2 days, their DAH<sub>30</sub> will be calculated as 30-13-2 (=15).

**Important:** If a patient dies within 30 days of surgery, irrespective of whether they have spent some time at home, DAH<sub>30</sub> should be scored as zero (0).

\*an alternative would be to use DAH<sub>90</sub> (up to 90 days after surgery) as an outcome metric in circumstances where a longer postoperative recovery is expected.

**Table S1. Trial Data Sources**

| Trial                                                                                                                                                                | N   | Reference                               |
|----------------------------------------------------------------------------------------------------------------------------------------------------------------------|-----|-----------------------------------------|
| 1. Tranexamic acid in coronary artery surgery                                                                                                                        | 613 | N Engl J Med 2016; Oct                  |
| 2. The safety of addition of nitrous oxide to general anaesthesia in at-risk patients having major non-cardiac surgery (ENIGMA-II): a randomised, single-blind trial | 516 | Lancet 2014; 384:1446-54.               |
| 3. An enhanced recovery after surgery (ERAS) program for hip and knee arthroplasty                                                                                   | 310 | Med J Aust 2015; 202:363-8.             |
| 4. Experience of an enhanced recovery after surgery (ERAS) program for elective abdominal surgery                                                                    | 71  | Anaesth Intensive Care 2012; 40:450-9.  |
| 5. The measurement of disability-free survival after surgery                                                                                                         | 163 | Anesthesiology 2015; 122:524-36.        |
| 6. Perioperative management of patients treated with angiotensin converting enzyme inhibitors and angiotensin II receptor blockers: a quality improvement audit      | 263 | Anaesth Intensive Care 2016; 44:346-52. |
| 7. Restrictive versus liberal fluid therapy in major abdominal surgery                                                                                               | 173 | ClinicalTrials.gov NCT01424150          |



**Figure S1.** The impact of the quantile (50<sup>th</sup> – 75<sup>th</sup> percentile) choice for days at home up to 30 days (here, DAAH30) on the associations of patient age category, ASA physical status and surgical duration, demonstrating the covariates are reasonably stable over this range.

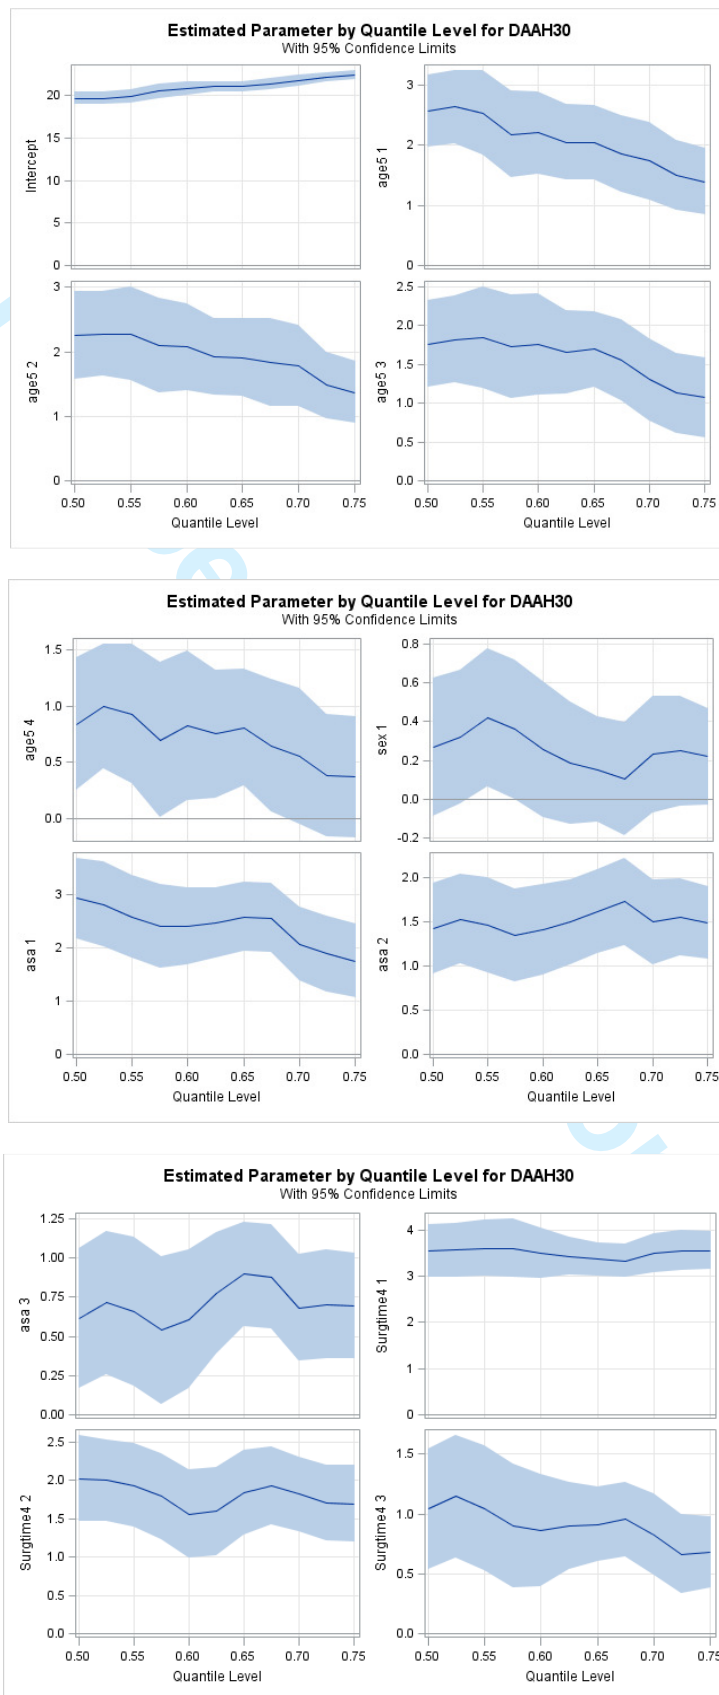

**Table S2. Third Quartile (Q3) Days at Home up to 30 Days after Surgery (DAH<sub>30</sub>) According to Patient and Perioperative Characteristics.#**

| Variable               | no. (%)   | Raw Q3<br>DAH <sub>30</sub> (95% CI) | P value | Adjusted Q3<br>DAH <sub>30</sub> (95% CI)* | P-value |
|------------------------|-----------|--------------------------------------|---------|--------------------------------------------|---------|
| Patient age            |           |                                      |         |                                            |         |
| <50 years              | 220 (11)  | 27.2 ( 26.5 , 27.9 )                 | <.0001  | 26.1 ( 25.8 , 26.5 )                       | <0.0001 |
| 50-60 years            | 396 (19)  | 25.9 ( 25.5 , 26.4 )                 |         | 26.1 ( 25.9 , 26.4 )                       |         |
| 60-70 years            | 612 (29)  | 25.7 ( 25.0 , 26.4 )                 |         | 25.8 ( 25.6 , 26.1 )                       |         |
| 70-80 years            | 653 (31)  | 25.0 ( 24.6 , 25.4 )                 |         | 25.1 ( 24.8 , 25.4 )                       |         |
| ≥80 years              | 228 (11)  | 24.8 ( 24.3 , 25.3 )                 |         | 24.7 ( 24.1 , 25.4 )                       |         |
| Sex                    |           |                                      |         |                                            |         |
| Male                   | 1427 (68) | 25.1 ( 24.8 , 25.4 )                 | <.0001  | 25.6 ( 25.5 , 25.8 )                       | 0.146   |
| Female                 | 682 (32)  | 26.2 ( 25.6 , 26.8 )                 |         | 25.4 ( 25.2 , 25.7 )                       |         |
| Smoker                 |           |                                      |         |                                            |         |
| yes                    | 787 (37)  | 25.0 ( 24.8 , 25.1 )                 | <.0001  | not done                                   |         |
| no                     | 1322 (63) | 26.0 ( 25.7 , 26.2 )                 |         | not done                                   |         |
| Diabetes               |           |                                      |         |                                            |         |
| yes                    | 697 (33)  | 25.8 ( 25.1 , 26.5 )                 | >.99    | not done                                   |         |
| no                     | 1412 (67) | 25.8 ( 25.6 , 26.0 )                 |         | not done                                   |         |
| Heart failure          |           |                                      |         |                                            |         |
| yes                    | 365 (17)  | 25.9 ( 25.2 , 26.7 )                 | 0.39    | not done                                   |         |
| no                     | 1744 (83) | 25.8 ( 25.4 , 26.2 )                 |         | not done                                   |         |
| ASA physical status    |           |                                      |         |                                            |         |
| 1                      | 41 (1.9)  | 29.0 ( 28.8 , 29.3 )                 | <.0001  | 26.6 ( 26.0 , 27.2 )                       | <0.0001 |
| 2                      | 530 (25)  | 27.0 ( 26.9 , 27.1 )                 |         | 26.3 ( 26.0 , 26.6 )                       |         |
| 3                      | 1024 (51) | 25.8 ( 25.3 , 26.3 )                 |         | 25.5 ( 25.3 , 25.8 )                       |         |
| 4                      | 510 (24)  | 23.9 ( 23.8 , 24.0 )                 |         | 24.8 ( 24.5 , 25.1 )                       |         |
| Duration of Surgery, h |           |                                      |         |                                            |         |
| <2.0                   | 581 (29)  | 28.1 ( 27.7 , 28.6 )                 | <.0001  | 27.6 ( 27.3 , 28.0 )                       | <0.0001 |
| 2.0-2.99               | 412 (20)  | 26.1 ( 25.6 , 26.5 )                 |         | 25.8 ( 25.4 , 26.2 )                       |         |
| 3.0-3.99               | 551 (26)  | 24.8 ( 24.7 , 24.9 )                 |         | 24.8 ( 24.5 , 25.0 )                       |         |
| ≥4.0                   | 565 (27)  | 23.9 ( 23.8 , 23.9 )                 |         | 24.1 ( 23.8 , 24.4 )                       |         |

# The effect of the different covariates were largely consistent across a large range of meaningful percentile values (e.g. 50<sup>th</sup> – 75<sup>th</sup>) with a slightly smaller effect for age categories as the percentile gets higher but for simplicity we only present the results for Q3 (75<sup>th</sup> percentile). This percentile is also close to the main mode of the distribution.

\*covariates including in the multivariable adjustment were: patient age, sex, American Society of Anesthesiologists (ASA) physical status and duration of surgery

**Table S3. Third Quartile (Q3) (95% CI) Days at Home up to 30 Days after Surgery According to Postoperative Complications.**

| Variable (no. [%])                  | No. with complete data | Yes                | No                 | P value <sup>a</sup> |
|-------------------------------------|------------------------|--------------------|--------------------|----------------------|
| Myocardial infarction (120 [6.5])   | 1846                   | 22.9 (22.2 - 23.5) | 25.8 (25.4 - 26.2) | <0.0001              |
| Stroke (13 [0.7])                   | 1846                   | 18.9 (10.0 - 27.8) | 25.2 (24.6 - 25.7) | 0.019                |
| Pulmonary embolism (7 [0.4])        | 1846                   | 23.1 (16.1 - 30.1) | 25.2 (24.6 - 25.7) | 0.19                 |
| Cardiac arrest (3 [0.2])            | 1846                   | 20.1 (8.0 - 32.1)  | 25.2 (24.6 - 25.7) | 0.052                |
| Surgical site infection (129 [7.0]) | 1846                   | 24.8 (23.7 - 26.0) | 25.3 (24.7 - 25.9) | <0.0001              |
| Any of the above (263 [14.2])       | 1846                   | 23.7 (23.0 - 24.5) | 25.8 (25.6 - 26.1) | <0.0001              |
| Hospital readmission (150 [7.1])    | 2090                   | 21.7 (20.8 - 22.7) | 25.9 (25.8 - 26.0) | <0.0001              |

<sup>a</sup> P values calculated using likelihood ratio test.

**Table S4. Days at Home up to 30 Days after Surgery (DAH<sub>30-rehab</sub>), Assuming 5 Days' Admission to a Rehabilitation Facility if it Occurred, According to Types of Surgery.**

| Surgery                                | No. admitted to a rehabilitation hospital (%) | Mean (95% CI) DAH <sub>30-rehab</sub> |
|----------------------------------------|-----------------------------------------------|---------------------------------------|
| Cardiac (n=679)                        | 54 (8.0)                                      | 22.8 (22.7-22.9)                      |
| Orthopaedic (n=289)                    | 122 (42)                                      | 21.9 (21.2-22.6)                      |
| Neurosurgery (n=220)                   | 9 (4.0)                                       | 22.8 (22.2-23.5)                      |
| Colorectal (n=118)                     | 8 (6.8)                                       | 24.9 (24.1-25.8)                      |
| Urology (n=315)                        | 26 (8.3)                                      | 23.8 (23.0-24.5)                      |
| Vascular (n=56)                        | 1 (1.8)                                       | 26.0 (24.4-27.6)                      |
| Ear, nose, throat (n=99)               | 17 (17)                                       | 25.8 (24.3-27.3)                      |
| Oesophagogastric/hepatobiliary (n=253) | 4 (1.6)                                       | 24.9 (23.8-26.1)                      |
| Thoracic (n=28)                        | 2 (7.1)                                       | 22.8 (17.9-27.8)                      |
| Other (n=52)                           | 2 (3.8)                                       | 28.8 (27.7-30.0)                      |

**Table S5. Days at Home up to 30 Days after Surgery (DAH<sub>30</sub>), Assuming 5 Days' Admission to a Rehabilitation Facility if it Occurred, According to Patient and Perioperative Characteristics.<sup>∞</sup>**

| Variable               | no. (%)   | Raw median<br>DAH <sub>30-rehab</sub> (95% CI) | P value | Adjusted median<br>DAH <sub>30-rehab</sub> (95% CI)* | P value# |
|------------------------|-----------|------------------------------------------------|---------|------------------------------------------------------|----------|
| Patient age            |           |                                                | <0.0001 |                                                      | <0.0001  |
| <50 years              | 220 (11)  | 24.9 (24.5 - 25.2)                             |         | 24.6 (24.2 - 25.1)                                   |          |
| 50-60 years            | 396 (19)  | 23.9 (23.5 - 24.3)                             |         | 24.5 (24.0 - 25.0)                                   |          |
| 60-70 years            | 612 (29)  | 23.8 (23.5 - 24.1)                             |         | 23.6 ( 23.2 - 24.0)                                  |          |
| 70-80 years            | 653 (31)  | 22.0 (21.5 - 22.4)                             |         | 22.5 (21.9 - 23.1)                                   |          |
| ≥80 years              | 228 (11)  | 20.9 (19.6 - 22.2)                             |         | 21.4 (20.4 - 22.4)                                   |          |
| Sex                    |           |                                                | 0.90    |                                                      | 0.0052   |
| male                   | 1427 (68) | 23.0 (22.6 - 23.4)                             |         | 23.6 (23.3 - 23.9)                                   |          |
| female                 | 682 (32)  | 23.0 (22.4 - 23.6)                             |         | 22.7 (22.2 - 23.3)                                   |          |
| Smoker                 |           |                                                | >0.99   |                                                      |          |
| yes                    | 787 (37)  | 23.0 (22.5 - 23.5)                             |         |                                                      |          |
| no                     | 1322 (63) | 23.0 (22.6 - 23.4)                             |         |                                                      |          |
| Diabetes               |           |                                                | 0.091   |                                                      |          |
| yes                    | 697 (33)  | 22.8 (22.6 - 23.1)                             |         |                                                      |          |
| no                     | 1412 (67) | 23.2 (22.6 - 23.8)                             |         |                                                      |          |
| Heart failure          |           |                                                | 0.16    |                                                      |          |
| yes                    | 365 (17)  | 22.8 (22.3 - 23.3)                             |         |                                                      |          |
| no                     | 1744 (83) | 23.1 (22.6 - 23.7)                             |         |                                                      |          |
| ASA physical status    |           |                                                |         |                                                      |          |
| 1                      | 41 (1.9)  | 27.9 (26.1 - 29.7)                             |         | 25.3 (24.3 - 26.3)                                   | <0.0001  |
| 2                      | 530 (25)  | 24.9 (24.6 - 25.1)                             | <0.0001 | 24.0 (23.6 - 24.5)                                   |          |
| 3                      | 1024 (51) | 22.9 (22.7 - 23.1)                             |         | 23.1 (22.7 - 23.5)                                   |          |
| 4                      | 510 (24)  | 21.9 (21.5 - 22.3)                             |         | 22.9 (22.4 - 23.4)                                   |          |
| Duration of Surgery, h |           |                                                | <0.0001 |                                                      | <0.0001  |
| <2.0                   | 581 (29)  | 25.8 (25.1 - 26.4)                             |         | 25.4 (24.9 - 26.0)                                   |          |
| 2.0-2.99               | 412 (20)  | 23.8 (23.3 - 24.3)                             |         | 23.6 (23.2 - 24.0)                                   |          |
| 3.0-3.99               | 551 (26)  | 22.8 (22.7 - 23.0)                             |         | 22.7 (22.3 - 23.1)                                   |          |
| ≥4.0                   | 565 (27)  | 21.8 (21.0 - 22.5)                             |         | 21.6 (20.9 - 22.2)                                   |          |

\*covariates including in the multivariable adjustment were: patient age, sex, American Society of Anesthesiologists (ASA) physical status and duration of surgery

#P values calculated using the quasi-likelihood ratio test.

<sup>∞</sup> If a patient has spent less than 5 days at home and went to rehab, DAH<sub>30-rehab</sub> is set to 0 to avoid negative values.

**Table S6. Median (95% CI) Days at Home up to 30 Days after Surgery, Assuming 5 Days' Admission to a Rehabilitation Facility if it Occurred, According to Postoperative Complications.\***

| Variable (no. [%])                  | No. with complete data | Yes                | No                              | P value <sup>a</sup> |
|-------------------------------------|------------------------|--------------------|---------------------------------|----------------------|
| Myocardial infarction (120 [6.5])   | 1846                   | 19.0 (16.6 - 21.5) | 23.1 (22.6 - 23.7)              | <0.0001              |
| Stroke (13 [0.7])                   | 1846                   | 10.1 (3.7 - 16.5)  | 23.0 (22.8 - 23.2)              | <0.0001              |
| Pulmonary embolism (7 [0.4])        | 1846                   | 17.1 (8.0 - 26.3)  | 23.0 (22.7 - 23.2)              | 0.032                |
| Cardiac arrest (3 [0.2])            | 1846                   | 15.1 (0.7 - 29.4)  | 23.0 (22.8 - 23.2)              | 0.0065               |
| Surgical site infection (129 [7.0]) | 1846                   | 20.7 (18.9 - 22.6) | 23.1 (22.6 - 23.6)              | <0.0001              |
| Any of the above (263 [14.2])       | 1846                   | 19.1 (17.5 - 20.8) | 23.7 (23.3 - 24.1)              | <0.0001              |
| Hospital readmission (150 [7.1])    | 2090                   | 17.2 (15.4 - 19.0) | 23.7 (23.3 - 24.1) <sup>b</sup> | <0.0001              |

<sup>a</sup> P values calculated using the quasi-likelihood ratio test.

<sup>b</sup> days calculated for those without readmission after excluding postoperative deaths.

\* If a patient has spent less than 5 days at home and went to rehab, DAH<sub>30-rehab</sub> is set to 0 to avoid negative values.

**Table S7. Days at Home up to 30 Days after Surgery (DAH<sub>30-rehab</sub>), Assuming 14 Days' Admission to a Rehabilitation Facility if it Occurred, According to Types of Surgery.\***

| Surgery                                | No. admitted to a rehabilitation hospital (%) | Median (95% CI) DAH <sub>30-rehab</sub> |
|----------------------------------------|-----------------------------------------------|-----------------------------------------|
| Cardiac (n=679)                        | 54 (8.0)                                      | 22.8 (22.6-22.9)                        |
| Orthopedic (n=289)                     | 122 (42)                                      | 20.9 (17.5-24.4)                        |
| Neurosurgery (n=220)                   | 9 (4.0)                                       | 22.8 (22.2-23.5)                        |
| Colorectal (n=118)                     | 8 (6.8)                                       | 24.9 (23.9-26.0)                        |
| Urology (n=315)                        | 26 (8.3)                                      | 23.8 (23.0-24.5)                        |
| Vascular (n=56)                        | 1 (1.8)                                       | 26.0 (24.4-27.6)                        |
| Ear, nose, throat (n=99)               | 17 (17)                                       | 25.8 (24.3-27.3)                        |
| Oesophagogastric/hepatobiliary (n=253) | 4 (1.6)                                       | 24.9 (23.8-26.1)                        |
| Thoracic (n=28)                        | 2 (7.1)                                       | 22.8 (17.8-27.8)                        |
| Other (n=52)                           | 2 (3.8)                                       | 28.8 (27.7-30.0)                        |

\*If a patient has spent less than 5 days at home and went to rehab, DAH<sub>30-rehab</sub> is set to 0 to avoid negative values.

**Table S8. Days at Home up to 30 Days after Surgery (DAH<sub>30</sub>), Assuming 14 Days' Admission to a Rehabilitation Facility if it Occurred, According to Patient and Perioperative Characteristics.#**

| Variable               | no. (%)   | Raw median<br>DAH <sub>30-rehab</sub> (95% CI) | P value | Adjusted median<br>DAH <sub>30-rehab</sub> (95% CI)* | P value |
|------------------------|-----------|------------------------------------------------|---------|------------------------------------------------------|---------|
| Patient age            |           |                                                | <0.0001 |                                                      | <0.0001 |
| <50 years              | 220 (11)  | 24.9 (24.4 - 25.3)                             |         | 24.6 (24.2 - 25.1)                                   |         |
| 50-60 years            | 396 (19)  | 23.9 (23.6 - 24.3)                             |         | 24.5 (24.0 - 25.0)                                   |         |
| 60-70 years            | 612 (29)  | 23.8 (23.5 - 24.1)                             |         | 23.6 (23.3 - 24.0)                                   |         |
| 70-80 years            | 653 (31)  | 22.0 (21.5 - 22.4)                             |         | 22.5 (21.9 - 23.1)                                   |         |
| ≥80 years              | 228 (11)  | 20.9 (19.6 - 22.2)                             |         | 21.5 (20.5 , 22.4)                                   |         |
| Sex                    |           |                                                | 0.84    |                                                      | 0.0065  |
| male                   | 1427 (68) | 23.0 (22.6 - 23.4)                             |         | 23.6 (23.3 - 23.9)                                   |         |
| female                 | 682 (32)  | 23.0 (22.3 - 23.6)                             |         | 22.7 (22.2 - 23.3)                                   |         |
| Smoker                 |           |                                                | 0.92    |                                                      |         |
| yes                    | 787 (37)  | 23.0 (22.5 - 23.5)                             |         |                                                      |         |
| no                     | 1322 (63) | 23.0 (22.5 - 23.4)                             |         |                                                      |         |
| Diabetes               |           |                                                | 0.12    |                                                      |         |
| yes                    | 697 (33)  | 22.8 (22.6 - 23.1)                             |         |                                                      |         |
| no                     | 1412 (67) | 23.2 (22.5 - 23.8)                             |         |                                                      |         |
| Heart failure          |           |                                                | 0.19    |                                                      |         |
| yes                    | 365 (17)  | 22.8 (22.3 - 23.3)                             |         |                                                      |         |
| no                     | 1744 (83) | 23.1 (22.6 - 23.7)                             |         |                                                      |         |
| ASA physical status    |           |                                                | <0.0001 |                                                      | <0.0001 |
| 1                      | 41 (1.9)  | 27.9 (26.0 - 29.8)                             |         | 25.3 (24.2 - 26.3)                                   |         |
| 2                      | 530 (25)  | 24.9 (24.6 - 25.1)                             |         | 24.1 (23.6 - 24.6)                                   |         |
| 3                      | 1024 (51) | 22.9 (22.7 - 23.1)                             |         | 23.1 (22.7 - 23.5)                                   |         |
| 4                      | 510 (24)  | 21.9 (21.5 - 22.4)                             |         | 22.9 (22.4 - 23.4)                                   |         |
| Duration of Surgery, h |           |                                                | <0.0001 |                                                      | <0.0001 |
| <2.0                   | 581 (29)  | 25.8 (25.1 - 26.4)                             |         | 25.4 (24.9 - 26.0)                                   |         |
| 2.0-2.99               | 412 (20)  | 23.8 (23.3 - 24.4)                             |         | 23.6 (23.2 - 24.1)                                   |         |
| 3.0-3.99               | 551 (26)  | 22.8 (22.7 - 23.0)                             |         | 22.7 (22.3 - 23.1)                                   |         |
| ≥4.0                   | 565 (27)  | 21.8 (21.0 - 22.5)                             |         | 21.6 (20.9 - 22.2)                                   |         |

\*covariates including in the multivariable adjustment were: patient age, sex, American Society of Anesthesiologists (ASA) physical status and duration of surgery.

#If a patient has spent less than 5 days at home and went to rehab, DAH<sub>30-rehab</sub> is set to 0 to avoid negative values.



**Table S9. Median (95% CI) Days at Home up to 30 Days after Surgery, Assuming 14 Days' Admission to a Rehabilitation Facility if it Occurred, According to Postoperative Complications.**

| Variable (no. [%])                   | No. with complete data | Yes                  | No                                | P value <sup>a</sup> |
|--------------------------------------|------------------------|----------------------|-----------------------------------|----------------------|
| Myocardial infarction (120 [6.5])    | 1846                   | 19.0 ( 16.5 , 21.6 ) | 23.1 ( 22.6 , 23.7 )              | <0.0001              |
| Stroke (13 [ 0.7])                   | 1846                   | 10.1 ( 3.4 , 16.9 )  | 23.0 ( 22.8 , 23.2 )              | <0.0001              |
| Pulmonary embolism (7 [ 0.4])        | 1846                   | 17.1 ( 8.3 , 26.0 )  | 23.0 ( 22.7 , 23.2 )              | 0.032                |
| Cardiac arrest (3 [0.2])             | 1846                   | 15.1 ( 0.4 , 29.8 )  | 23.0 ( 22.8 , 23.2 )              | 0.0065               |
| Surgical site infection (129 [ 7.0]) | 1846                   | 20.7 ( 19.0 , 22.5 ) | 23.1 ( 22.6 , 23.6 )              | <0.0001              |
| Any of the above (263 [ 14.2])       | 1846                   | 19.1 ( 17.5 , 20.8 ) | 23.7 ( 23.3 , 24.1 )              | <0.0001              |
| Hospital readmission (150 [ 7.1])    | 2090                   | 17.2 ( 15.4 , 18.9 ) | 23.7 ( 23.3 , 24.1 ) <sup>b</sup> | <0.0001              |

<sup>a</sup> P values calculated using the quasi-likelihood ratio test.

<sup>b</sup> Days calculated for those without readmission after excluding postoperative deaths. If a patient has spent less than 5 days at home and went to rehab, DAH<sub>30-rehab</sub> is set to 0 to avoid negative values.

STROBE 2007 (v4) Statement—Checklist of items that should be included in reports of *cohort studies*

| Section/Topic                | Item # | Recommendation                                                                                                                                                                       | Reported on page # |
|------------------------------|--------|--------------------------------------------------------------------------------------------------------------------------------------------------------------------------------------|--------------------|
| Title and abstract           | 1      | (a) Indicate the study's design with a commonly used term in the title or the abstract                                                                                               | 1                  |
|                              |        | (b) Provide in the abstract an informative and balanced summary of what was done and what was found                                                                                  | 2                  |
| <b>Introduction</b>          |        |                                                                                                                                                                                      |                    |
| Background/rationale         | 2      | Explain the scientific background and rationale for the investigation being reported                                                                                                 | 4,5                |
| Objectives                   | 3      | State specific objectives, including any prespecified hypotheses                                                                                                                     | 5                  |
| <b>Methods</b>               |        |                                                                                                                                                                                      |                    |
| Study design                 | 4      | Present key elements of study design early in the paper                                                                                                                              | 6                  |
| Setting                      | 5      | Describe the setting, locations, and relevant dates, including periods of recruitment, exposure, follow-up, and data collection                                                      | 6                  |
| Participants                 | 6      | (a) Give the eligibility criteria, and the sources and methods of selection of participants. Describe methods of follow-up                                                           | 6                  |
|                              |        | (b) For matched studies, give matching criteria and number of exposed and unexposed                                                                                                  | n/a                |
| Variables                    | 7      | Clearly define all outcomes, exposures, predictors, potential confounders, and effect modifiers. Give diagnostic criteria, if applicable                                             | 7,8                |
| Data sources/<br>measurement | 8*     | For each variable of interest, give sources of data and details of methods of assessment (measurement). Describe comparability of assessment methods if there is more than one group | 7                  |
| Bias                         | 9      | Describe any efforts to address potential sources of bias                                                                                                                            | 8                  |
| Study size                   | 10     | Explain how the study size was arrived at                                                                                                                                            | 6                  |
| Quantitative variables       | 11     | Explain how quantitative variables were handled in the analyses. If applicable, describe which groupings were chosen and why                                                         | 8,9                |
| Statistical methods          | 12     | (a) Describe all statistical methods, including those used to control for confounding                                                                                                | 9                  |
|                              |        | (b) Describe any methods used to examine subgroups and interactions                                                                                                                  | 9                  |
|                              |        | (c) Explain how missing data were addressed                                                                                                                                          | 9                  |
|                              |        | (d) If applicable, explain how loss to follow-up was addressed                                                                                                                       | n/a                |
|                              |        | (e) Describe any sensitivity analyses                                                                                                                                                | 10                 |
| <b>Results</b>               |        |                                                                                                                                                                                      |                    |

|                          |     |                                                                                                                                                                                                              |            |
|--------------------------|-----|--------------------------------------------------------------------------------------------------------------------------------------------------------------------------------------------------------------|------------|
| Participants             | 13* | (a) Report numbers of individuals at each stage of study—eg numbers potentially eligible, examined for eligibility, confirmed eligible, included in the study, completing follow-up, and analysed            | 10         |
|                          |     | (b) Give reasons for non-participation at each stage                                                                                                                                                         | 9          |
|                          |     | (c) Consider use of a flow diagram                                                                                                                                                                           | Not used   |
| Descriptive data         | 14* | (a) Give characteristics of study participants (eg demographic, clinical, social) and information on exposures and potential confounders                                                                     | 9, Table 2 |
|                          |     | (b) Indicate number of participants with missing data for each variable of interest                                                                                                                          | n/a        |
|                          |     | (c) Summarise follow-up time (eg, average and total amount)                                                                                                                                                  | 9          |
| Outcome data             | 15* | Report numbers of outcome events or summary measures over time                                                                                                                                               | 10,22      |
| Main results             | 16  | (a) Give unadjusted estimates and, if applicable, confounder-adjusted estimates and their precision (eg, 95% confidence interval). Make clear which confounders were adjusted for and why they were included | 10         |
|                          |     | (b) Report category boundaries when continuous variables were categorized                                                                                                                                    | n/a        |
|                          |     | (c) If relevant, consider translating estimates of relative risk into absolute risk for a meaningful time period                                                                                             | n/a        |
| Other analyses           | 17  | Report other analyses done—eg analyses of subgroups and interactions, and sensitivity analyses                                                                                                               | 10,11      |
| <b>Discussion</b>        |     |                                                                                                                                                                                                              |            |
| Key results              | 18  | Summarise key results with reference to study objectives                                                                                                                                                     | 12         |
| <b>Limitations</b>       |     |                                                                                                                                                                                                              |            |
| Interpretation           | 20  | Give a cautious overall interpretation of results considering objectives, limitations, multiplicity of analyses, results from similar studies, and other relevant evidence                                   | 13         |
| Generalisability         | 21  | Discuss the generalisability (external validity) of the study results                                                                                                                                        | 12,14      |
| <b>Other information</b> |     |                                                                                                                                                                                                              |            |
| Funding                  | 22  | Give the source of funding and the role of the funders for the present study and, if applicable, for the original study on which the present article is based                                                | 1          |

\*Give information separately for cases and controls in case-control studies and, if applicable, for exposed and unexposed groups in cohort and cross-sectional studies.

**Note:** An Explanation and Elaboration article discusses each checklist item and gives methodological background and published examples of transparent reporting. The STROBE checklist is best used in conjunction with this article (freely available on the Web sites of PLoS Medicine at <http://www.plosmedicine.org/>, Annals of Internal Medicine at <http://www.annals.org/>, and Epidemiology at <http://www.epidem.com/>). Information on the STROBE Initiative is available at [www.strobe-statement.org](http://www.strobe-statement.org).

# BMJ Open

## Validation of Days at Home as an Outcome Measure after Surgery: a prospective cohort study in Australia

|                                 |                                                                                                                                                                                                                                                                                                                                                                                                                                                                                                                                                                 |
|---------------------------------|-----------------------------------------------------------------------------------------------------------------------------------------------------------------------------------------------------------------------------------------------------------------------------------------------------------------------------------------------------------------------------------------------------------------------------------------------------------------------------------------------------------------------------------------------------------------|
| Journal:                        | <i>BMJ Open</i>                                                                                                                                                                                                                                                                                                                                                                                                                                                                                                                                                 |
| Manuscript ID                   | bmjopen-2017-015828.R3                                                                                                                                                                                                                                                                                                                                                                                                                                                                                                                                          |
| Article Type:                   | Research                                                                                                                                                                                                                                                                                                                                                                                                                                                                                                                                                        |
| Date Submitted by the Author:   | 14-Jun-2017                                                                                                                                                                                                                                                                                                                                                                                                                                                                                                                                                     |
| Complete List of Authors:       | Myles, Paul; Alfred Hospital and Monash University, Anaesthesia and Perioperative Medicine<br>Shulman, Mark; Alfred Hospital<br>Heritier, Stephane; School of Public Health and Preventive Medicine, Monash University, Department of Epidemiology and Preventive Medicine<br>Wallace, Sophie; Alfred Hospital<br>McIlroy, David; Alfred Hospital, Department of Anaesthesia and Perioperative Medicine<br>McCluskey, Stuart; University Health Network, Anesthesia and Pain Medicine<br>Sillar, Isabella; Alfred Hospital<br>Forbes, Andrew; Monash University |
| <b>Primary Subject Heading</b>: | Anaesthesia                                                                                                                                                                                                                                                                                                                                                                                                                                                                                                                                                     |
| Secondary Subject Heading:      | Surgery, Epidemiology                                                                                                                                                                                                                                                                                                                                                                                                                                                                                                                                           |
| Keywords:                       | STATISTICS & RESEARCH METHODS, outcome, perioperative medicine, Clinical trials < THERAPEUTICS                                                                                                                                                                                                                                                                                                                                                                                                                                                                  |
|                                 |                                                                                                                                                                                                                                                                                                                                                                                                                                                                                                                                                                 |

SCHOLARONE™  
Manuscripts

1  
2  
3  
4  
5  
6  
7  
8  
9  
10  
11  
12  
13  
14  
15  
16  
17  
18  
19  
20  
21  
22  
23  
24  
25  
26  
27  
28  
29  
30  
31  
32  
33  
34  
35  
36  
37  
38  
39  
40  
41  
42  
43  
44  
45  
46  
47  
48  
49  
50  
51  
52  
53  
54  
55  
56  
57  
58  
59  
60

## Validation of Days at Home as an Outcome Measure after Surgery: a prospective cohort study in Australia

Paul S. Myles,<sup>1,2,3</sup> Mark A. Shulman,<sup>1</sup> Stephane Heritier,<sup>3</sup> Sophie Wallace,<sup>1</sup> David R. McIlroy,<sup>1,2</sup> Stuart McCluskey,<sup>4</sup> Isabella Sillar,<sup>2</sup> Andrew Forbes<sup>3</sup>

---

<sup>1</sup>Department of Anaesthesia and Perioperative Medicine, Alfred Hospital, Melbourne, Australia

<sup>2</sup>Department of Anaesthesia and Perioperative Medicine, Monash University, Melbourne, Australia

<sup>3</sup>Department of Epidemiology and Preventive Medicine, Monash University, Melbourne, Australia

<sup>4</sup>Toronto General Hospital and University of Toronto, Toronto, ON, Canada

### **ADDRESS FOR CORRESPONDENCE**

Paul S. Myles  
Professor and Chair  
Department of Anaesthesia and Perioperative Medicine  
Alfred Hospital, Commercial Road, Melbourne, Victoria, 3004, Australia

Email: p.myles@alfred.org.au

**Word count:** 3035

*The Corresponding Author has the right to grant on behalf of all authors and does grant on behalf of all authors, a worldwide licence to the Publishers and its licensees in perpetuity, in all forms, formats and media (whether known now or created in the future), to i) publish, reproduce, distribute, display and store the Contribution, ii) translate the Contribution into other languages, create adaptations, reprints, include within collections and create summaries, extracts and/or, abstracts of the Contribution, iii) create any other derivative work(s) based on the Contribution, iv) to exploit all subsidiary rights in the Contribution, v) the inclusion of electronic links from the Contribution to third party material where-ever it may be located; and, vi) licence any third party to do any or all of the above.*

Competing interest statement - All authors declare that the answer to the questions on the competing interest form are all No and therefore have nothing to declare.

Funding - The Australian and New Zealand College of Anaesthetists; and the Australian National Health and Medical Research Council Practitioner Fellowship (Prof Myles).

## ABSTRACT

**OBJECTIVE** To evaluate “days at home up to 30 days after surgery” (DAH<sub>30</sub>) as a patient-centred outcome measure.

**DESIGN** Prospective cohort study.

**DATA SOURCE** Using clinical trial data (7 trials, 2109 patients) we calculated DAH<sub>30</sub> from length of stay, re-admission, discharge destination, and death up to 30 days after surgery.

**MAIN OUTCOME** The association between DAH<sub>30</sub> and serious complications after surgery.

**RESULTS** One or more complications occurred in 263 of 1846 (14.2%) patients, including 19 (1.0%) deaths within 30 days of surgery; 245 (11.6%) patients were discharged to a rehabilitation facility and 150 (7.1%) were readmitted to hospital within 30 days of surgery. The median DAH<sub>30</sub> was significantly less in older patients ( $P < 0.001$ ), those with poorer physical functioning ( $P < 0.001$ ), and in those undergoing longer operations ( $P < 0.001$ ). Patients with serious complications had less days at home than patients without serious complications (20.5 [95% CI, 19.1 to 21.9] vs 23.9 [95% CI, 23.8 to 23.9]  $P < 0.001$ ), and had higher rates of readmission (16.0% vs. 5.9%;  $P < 0.001$ ). After adjusting for patient age, sex, physical status and duration of surgery, the occurrence of postoperative complications was associated with fewer days at home after surgery (difference 3.0 [95% CI, 2.1 to 4.0] days;  $P < 0.001$ ).

**CONCLUSIONS** DAH<sub>30</sub> has construct validity and is a readily-obtainable generic patient-centred outcome measure. It is a pragmatic outcome measure for perioperative clinical trials.

### Strengths and limitations of the study

- This study integrates length of stay, re-admission, discharge destination, and early deaths after surgery into a single outcome metric, “days at home up to 30 days after surgery” (DAH<sub>30</sub>)
- Patients hope to recover quickly after surgery, free of complications and need for re-admission; DAH<sub>30</sub> is thus a patient-centred outcome
- Accurate calculation of DAH<sub>30</sub> requires knowledge of post-discharge location (home or nursing facility) and any re-admissions at the index or other hospitals
- Because early deaths heavily influence the DAH<sub>30</sub> metric, this information should be additionally reported if, say, the incidence exceeds 10%

## Introduction

Surgery and other interventional procedures are intended to relieve symptoms and in many cases prolong life. But surgery is not risk-free; perioperative complications can impair patient recovery resulting in prolonged hospitalization, short or longer term disability, and sometimes poor survival. A wide variety of outcome measures have been used to quantify each of these aspects of the postoperative experience but few provide a broad, patient-centred perspective of effective and efficient care;<sup>1</sup> these are needed to better inform the current shift towards value-based healthcare.<sup>2,3</sup>

Patient-centred care requires clinicians to consider outcomes that matter most to patients. That is, the patient's experience of their illness, quality of life, and functioning; their values, preferences and goals for health care.<sup>4</sup> Loss of the ability to live independently is a major concern for the elderly;<sup>5,6</sup> it is clearly a patient-centred outcome, and has been associated with postoperative readmissions and death after hospital discharge.<sup>5</sup>

Specific peri-procedural complications such as surgical site infection, respiratory failure, delirium, and myocardial infarction are clearly important to patients and physicians alike, but reliable and consistent detection is problematic. In any case such information is an incomplete description of the overall success of surgery and other perioperative care, and does not describe the impact of such complications on functioning and need for institutionalization. Similar challenges occur when nominating endpoints in clinical trials, including a lack of standardisation,<sup>7</sup> need for adjudication, and uncertainty about the overall health impact of each endpoint on a patient's recovery. There is a growing acceptance that



1  
2  
3 outcome measures used in clinical trials should be determined in partnership by patients  
4  
5 and physician-researchers, aiming to identify outcomes that are important to patients.<sup>8</sup>  
6  
7

8  
9  
10 “Days alive and out of hospital” has been shown to be a readily quantifiable and patient-  
11  
12 centred outcome measure in some chronic cardiovascular conditions such as heart failure  
13  
14 and atrial fibrillation,<sup>9-11</sup> and in geriatric medicine,<sup>12</sup> but it has not been used as an outcome  
15  
16 measure in perioperative trials. Home discharge has been proposed as a proxy for a  
17  
18 patient’s recovery after surgery,<sup>13</sup> and is estimated when using the American College of  
19  
20 Surgeons’ Surgical Risk Calculator,<sup>14</sup> but this does not account for readmissions or early  
21  
22 deaths, although the latter collects and reports some of this information.<sup>15</sup>  
23  
24  
25  
26  
27

28  
29 Our own work and that of others have shown that early return home after surgery,<sup>6 16-18</sup> and  
30  
31 medical illnesses such as stroke,<sup>19 20</sup> is highly valued by patients but could be undermined if  
32  
33 the patient were to be transferred to another type of nursing facility. A more favourable  
34  
35 perioperative outcome measure should account for both the initial hospital stay associated  
36  
37 with the index surgery, rehospitalisation due to post-discharge complications, discharge to  
38  
39 institutional care, and early deaths.  
40  
41  
42  
43  
44

45  
46 We thus chose to evaluate the utility of “days (alive and) at home” within 30 days of surgery  
47  
48 (DAH<sub>30</sub>) in the surgical/perioperative setting as a patient-centred outcome measure for  
49  
50 perioperative clinical trials and quality improvement activities. Our hypothesis was that  
51  
52 DAH<sub>30</sub> would be lower in higher risk patients, those undergoing more extensive surgery, and  
53  
54 in those with complications after surgery (i.e. it has construct validity).  
55  
56  
57  
58  
59  
60

## Methods

This manuscript was written in adherence to the Strengthening The Reporting of Observational Studies in Epidemiology (STROBE) statement.<sup>21</sup>

### Study Design and Data Sources

Data were obtained from each of seven recently completed clinical trials that prospectively enrolled patients undergoing various types of elective and emergency surgery at the Alfred Hospital in Melbourne, Australia. The cohort consisted of four multicentre randomised trials and three before-and-after studies (see Table S1 in the Supplementary Appendix).<sup>22-29</sup> For each trial we collected a comparable set of patient demographic and perioperative characteristics, and clinical outcome measures, including complete hospital discharge, discharge destination (home, rehabilitation facility, nursing home) and re-admission data. All but one study<sup>28</sup> prospectively recorded re-admission data; for the latter study we could obtain this information retrospectively from our hospital information system. Both the present study and each of the original trials received institutional ethics committee approval.

### Patients

Patients 18 years and older undergoing an elective or non-elective inpatient operation enrolled in one of the aforementioned trials were included. Study inclusion criteria were established for the original studies and typically identified those at increased risk of postoperative complications. In all cases patients provided informed consent before enrolment in the original trials.

### *Patient involvement*

Hospital patients have previously indicated the importance of returning home after hospitalisation for medical or surgical conditions,<sup>6 16-20</sup> but we did not involve patients or their carers in the design or conduct of this study.

### **Risk Factors and Outcomes**

Perioperative data included patient demographics, comorbidity, functional status, type and duration of surgery, hospital length of stay, hospital readmission(s), and in all but one study<sup>28</sup> we prospectively collected selected complications at 30 days after surgery: wound infection, myocardial infarction, stroke, pulmonary embolism, cardiac arrest, and death.

Hospital discharge data were used to calculate hospital length of stay. Whether the patient was discharged from hospital to their home or to a nursing facility was obtained from the electronic medical record, but for those admitted to a rehabilitation facility we were unable to ascertain the number of days admitted before eventual discharge home. For those readmitted to hospital we combined the original length of stay with subsequent hospital stay(s) to calculate total length of stay within 30 days postoperatively.

DAH<sub>30</sub> was calculated using mortality and hospitalisation data from the date of the index surgery (Day 0). For example, if a patient died on day 2 after their surgery, they were assigned 0 DAH<sub>30</sub>, if a patient was discharged from hospital on Day 6 after surgery but was subsequently readmitted for 4 days before their second hospital discharge, then they were assigned 20 DAH<sub>30</sub>. If a patient died within 30 days of surgery, irrespective of whether they

1  
2  
3 had spent some time at home, DAH<sub>30</sub> was scored as zero (0). Further explanation is provided  
4  
5 in the Supplementary Appendix.  
6  
7

8  
9  
10 Patients are commonly admitted to a post-acute hospital rehabilitation centre after lower  
11  
12 limb arthroplasty and cardiac surgery in our setting; some frail and elderly patients are also  
13  
14 transferred for ongoing convalescence. We were unable to reliably collect secondary length  
15  
16 of stay for rehabilitation facilities - we thus did two secondary analysis, assuming the length  
17  
18 of stay in a rehabilitation facility was 5 or 14 extra days. That is, DAH<sub>30-rehab5</sub> was calculated  
19  
20 as DAH<sub>30-5</sub>, and DAH<sub>30-rehab14</sub> was calculated as DAH<sub>30-14</sub>, in secondary analyses.  
21  
22  
23

24  
25  
26 For the multicentre trials,<sup>22-24</sup> a 12-lead electrocardiograph was recorded preoperatively and  
27  
28 on day 1 and 3 after surgery. Blood for troponin (or if unavailable, creatine kinase-  
29  
30 myocardial band) measurement was collected at 6 to 12 hours after surgery and on the first  
31  
32 three postoperative days. In all trials laboratory tests were otherwise ordered if clinically  
33  
34 indicated. Each complication was defined within the original study protocol and in all cases a  
35  
36 consistent definition was used. In brief, surgical site infection was confirmed if associated  
37  
38 with purulent discharge, with or without a positive microbial culture; or pathogenic  
39  
40 organisms isolated from aseptically obtained microbial culture,<sup>30</sup> although the most recent  
41  
42 trial<sup>27</sup> included documentation of a physician's diagnosis in this definition.<sup>31</sup> Pneumonia was  
43  
44 confirmed by a new pulmonary infiltrate reported by chest x-ray or computerized tomo-  
45  
46 graphy, in association with at least one of: temperature >38°C, white cell count >12,000/ml,  
47  
48 or positive sputum culture that was not heavily contaminated with oral flora or that  
49  
50 corresponded with positive blood cultures. Myocardial infarction was defined according to  
51  
52 the third universal definition,<sup>32</sup> requiring elevated cardiac biomarker plus at least one of the  
53  
54  
55  
56  
57  
58  
59  
60

1  
2  
3 following: (i) ischaemic symptoms, (ii) pathological Q waves, (iii) electrocardiographic  
4  
5 changes indicative of ischemia, (iv) coronary artery intervention or (v) new wall motion  
6  
7 abnormality on echocardiography or scanning; or autopsy finding of myocardial infarction.  
8  
9  
10 The threshold for significant elevated troponin was the hospital laboratory's 99th percentile  
11  
12 of a normal reference population (upper reference limit), according to recent  
13  
14 recommendations.<sup>33</sup> Stroke was confirmed if a new neurological deficit persisting for at  
15  
16 least 24 hours, verified by neurologist assessment and/or computerized tomography or  
17  
18 magnetic resonance imaging.  
19  
20

### 21 22 23 24 **Statistical Analysis**<sup>34 35</sup>

25  
26 Data were first merged and checked for inconsistencies. Patient age was grouped into 10-  
27  
28 year categories, and hourly cut-points for duration of surgery (2, 3, and 4 h) were created to  
29  
30 generate approximately similar group sizes and facilitate clinical interpretation. DAH<sub>30</sub> was  
31  
32 analysed using quantile regression.<sup>36</sup> This approach, well known in econometrics where it  
33  
34 was initially introduced, allows the modelling of any quantile of a continuous endpoint, here  
35  
36 DAH<sub>30</sub>, as a linear combination of the covariates. As DAH<sub>30</sub> is left skewed with a spike at  
37  
38 zero, it is more relevant to model the median (or alternatively, the 75<sup>th</sup> percentile) that is  
39  
40 closer to the major distribution mode and directly interpretable. The choice of the  
41  
42 quantile(s) to be analysed can be prespecified or a range of values selected for their  
43  
44 meaningfulness or exploratory purposes. Here the range 50<sup>th</sup>-75<sup>th</sup> percentile was deemed  
45  
46 relevant. No assumption on the true distribution of the endpoint is required. The asymptotic  
47  
48 distribution of the parameter estimates can be derived but depends on some unknown  
49  
50 density estimate. In general, resampling methods are recommended to obtain confidence  
51  
52 intervals (CIs).<sup>37 38</sup> Raw and adjusted medians and their 95% CIs obtained by bootstrapping  
53  
54  
55  
56  
57  
58  
59  
60

1  
2  
3 as implemented in Stata with 1000 replicates were reported for key predictors. The adjusted  
4  
5 models included age by 10-year categories, sex, American Society of Anesthesiologists (ASA)  
6  
7 physical status score, surgery time (< 2h, 2.0 - 2.99, 3.0 -3.99, ≥4.0). A goodness of fit test<sup>39</sup>  
8  
9 comparing this model to the full model including the same predictors plus smoking, heart  
10  
11 failure and diabetes was not any better (P=0.36). A global test of effect of any key predictor  
12  
13 was carried out using a quasi-likelihood ratio test.<sup>39</sup> Quantile regression was also used to  
14  
15 test median differences between those with and without complications, and by  
16  
17 postoperative complications. Supplementary analyses were done for the 75<sup>th</sup> percentile  
18  
19 (Q3). All analyses were done using Stata 14.0 except the quasi-likelihood ratio test analysis  
20  
21 that is only available in SAS. All tests were two-sided and performed at level  $\alpha=0.05$ ; no  
22  
23 correction was made for multiple comparisons.  
24  
25  
26  
27  
28  
29  
30  
31  
32

### 33 Results

34  
35  
36 A total of 2109 eligible patients 18 years and older were enrolled into clinical trials and  
37  
38 underwent inpatient operations at the Alfred Hospital between March 2006 and September  
39  
40 2016. The number of patients enrolled in each of the trials is detailed in the Supplement  
41  
42 (Supplementary Table 1). The cohort included 1427 male patients (67.7%) with a mean (SD)  
43  
44 age of 65 (12) years who underwent a range of inpatient operations (Table 1). Most  
45  
46 operations were cardiac surgical procedures (679 [32.2%]), followed by general (489  
47  
48 [23.2%]), urologic (315 [14.9%]), and neurosurgical procedures (220 [10.4%]).  
49  
50  
51  
52  
53  
54

55 There was a bimodal, skewed distribution of DAH<sub>30</sub> (Figure 1). The spike at zero consisted of  
56  
57 19 patients (1.0%) that died, and 40 patients remaining in hospital at least 30 days after  
58  
59  
60

1  
2  
3 surgery. DAH<sub>30</sub> and rates of admission to a rehabilitation centre varied according to type of  
4  
5 surgery (Table 2).  
6  
7  
8  
9

10  
11 One or more complications occurred in 263 (14.2%) patients. Overall, 245 (11.6%) patients  
12  
13 were admitted to a rehabilitation facility and 150 (7.1%) were readmitted within 30 days of  
14  
15 surgery. The median DAH<sub>30</sub> was 23.7 (95% CI, 23.5 to 24.0), but this varied according to type  
16  
17 of surgery (Table 1).  
18  
19  
20  
21  
22

23  
24 The median DAH<sub>30</sub> was significantly less in older patients, current smokers, diabetics, those  
25  
26 with poorer physical functioning, and undergoing longer operations (Table 2). These  
27  
28 associations remained after adjustment for all of these covariates and patient sex (Table 2).  
29  
30 The individual complications of myocardial infarction, stroke, pulmonary embolism, and  
31  
32 surgical site infection were each associated with shorter DAH<sub>30</sub> (Table 3) in a raw analysis.  
33  
34 Hospital readmission was also a factor, decreasing median DAH<sub>30</sub> when compared with  
35  
36 those not readmitted to hospital, 17.9 (95% CI, 16.3 to 19.5) vs 23.9 (95% CI, 23.8 to 23.9),  
37  
38 respectively (P<0.0001).  
39  
40  
41  
42  
43  
44

45  
46 After adjusting for patient age, sex, ASA physical status and duration of surgery, the  
47  
48 occurrence of any postoperative complication was associated with fewer days at home after  
49  
50 surgery (difference 3.0 [95% CI, 2.1 to 4.0] days; P<0.0001).  
51  
52  
53

#### 54 **Supplementary Analyses**

55  
56  
57  
58  
59  
60

1  
2  
3 The above findings were consistent when analysing the 3<sup>rd</sup> quartile distributions and  
4 differences (Tables S2-S4 in the Supplementary Appendix), and after accounting for the  
5 additional loss of days at home because of admission to a rehabilitation centre (Tables S5 –  
6 S9 in the Supplementary Appendix).  
7  
8  
9  
10  
11  
12

### 13 14 15 **Discussion**

16  
17 We found that DAH<sub>30</sub> has construct validity and is a readily-obtainable patient-centred  
18 outcome measure that could be used to better inform patients and physicians when  
19 planning surgery. Unlike previous related measures, DAH<sub>30</sub> accounts for each of delayed  
20 hospital discharge because of postoperative complications, discharge to a rehabilitation  
21 centre or other post-acute care nursing facility, rehospitalisations, and postoperative  
22 deaths. It thus captures much of the surgical experience, integrating efficacy, quality and  
23 safety, and thus reflecting value-based care. It can also be risk-adjusted for bench-marking  
24 purposes. DAH<sub>30</sub> will be maximized when patients recover free of complications after  
25 surgery, with optimal comfort and functioning - aligning with patient values and  
26 preferences, and goals for health care.<sup>4</sup>  
27  
28  
29  
30  
31  
32  
33  
34  
35  
36  
37  
38  
39  
40  
41  
42

43 Although concerns are frequently raised about the usefulness of hospital length of stay as  
44 an outcome measure after surgery, largely because of social factors and reluctance to  
45 discharge on weekends, it mostly adds variance (background noise) in clinical trials and is  
46 not biased. Hospital stay is a reasonable surrogate for quality and speed of recovery after  
47 surgery,<sup>13 40-42</sup> and it has marked resource/cost implications. Most patients want to go home  
48 as soon as possible – it is a desired outcome in and of itself.  
49  
50  
51  
52  
53  
54  
55  
56  
57  
58  
59  
60



1  
2  
3 The US has a triple aim of improving the healthcare system: improving the patient  
4  
5 experience of care, improving the health of populations, and reducing per capita costs of  
6  
7 healthcare.<sup>43</sup> DAH<sub>30</sub> seems to be useful, generic metric in this regard.<sup>44</sup> DAH<sub>30</sub> is a measure  
8  
9 of the overall burden of care, both in hospital and post-discharge. The perceived success of  
10  
11 a hospital discharge plan as perceived by the patient and their principal carer depends on  
12  
13 clear communication and meeting expectations.<sup>45</sup> DAH<sub>30</sub> offers transparency and  
14  
15 opportunities for benchmarking performance, both of which are important components of  
16  
17 quality improvement.<sup>13</sup> It may influence alternative payment contracts for hospitals.  
18  
19  
20  
21  
22  
23

24 Postoperative complications add to hospital costs and increase length of stay.<sup>46</sup> Higher  
25  
26 episode payments at “lower-quality” hospitals have been attributed to higher rates of  
27  
28 complications, 30-day readmissions, and post-discharge ancillary care.<sup>46</sup> Serious  
29  
30 postoperative complications are both strongly associated with readmission,<sup>5 17</sup> increasing  
31  
32 the risk by 6.7-fold, and loss of independence.<sup>5</sup> Readmission is a frequent, costly, and  
33  
34 sometimes life-threatening event that is associated with gaps in follow-up care.<sup>15 17 47</sup>  
35  
36 Readmission after surgery is thus an established quality indicator. Trends in readmissions  
37  
38 suggest that US hospitals are responding to incentives to reduce readmissions under the  
39  
40 Affordable Care Act.<sup>48 49</sup> Hospital readmission rates are not highly correlated with mortality  
41  
42 rates,<sup>50</sup> so they offer an independent and more sensitive measure of quality. Even though  
43  
44 some readmissions are due to chronic medical conditions,<sup>47</sup> optimal perioperative care  
45  
46 should keep these to a minimum and such improvements should be reflected in more  
47  
48  
49  
50  
51  
52  
53 DAH<sub>30</sub>.  
54  
55  
56  
57  
58  
59  
60

1  
2  
3 Enhanced recovery after surgery programs are designed to reduce complications and  
4  
5 shorten length of stay. But this sometimes comes at the cost of increased hospital re-  
6  
7 admissions.<sup>51 52</sup> The measurement and reporting of DAH<sub>30</sub> would identify this and hopefully  
8  
9 encourage further quality improvement. Planned discharge to a rehabilitation facility  
10  
11 sometimes forms part of an enhanced recovery pathway, and in any case may not be seen  
12  
13 by the patient or their family as indicating a poor outcome. Therefore, calculation of DAH<sub>30</sub>  
14  
15 in some studies could incorporate days spent in a rehabilitation facility as equivalent to  
16  
17 being home. In contrast, unplanned admission to a rehabilitation facility would indicate  
18  
19 poor care or adverse outcome, and this should be retained in the calculation of DAH<sub>30</sub>. Care  
20  
21 should be taken to avoid missing out-of-network hospitalizations, particularly if relying on  
22  
23 hospital system electronic medical records. The latter will otherwise enhance the efficiency  
24  
25 of data collection.  
26  
27  
28  
29  
30  
31  
32

33 Composite endpoints used in perioperative trials are often flawed,<sup>53-55</sup> typically used to  
34  
35 increase the number of events in order to enhance statistical power. DAH<sub>30</sub>, as a numerical  
36  
37 patient-centred measure, provides more statistical power, can be reliably measured and has  
38  
39 direct patient-centredness. Although some postoperative complications and poor survival  
40  
41 can manifest many months after surgery in those recovering from major surgery or critical  
42  
43 illness,<sup>29 56 57</sup> extending measurement out to 90 days after surgery (i.e. DAH<sub>90</sub>) may not  
44  
45 necessarily provide new or different information because the extra burden and costs of  
46  
47 further data collection may outweigh the benefits of the extra information obtained. In  
48  
49 addition, disease progression or other aspects of life may confound outcome evaluation of  
50  
51 perioperative care.  
52  
53  
54  
55  
56  
57  
58  
59  
60

1  
2  
3 Our study has several limitations. First, this was a single-centre study of clinical trial data  
4 collected for other purposes; external validity needs to be further evaluated. Second,  
5 postoperative in-hospital deaths have a major influence on the calculation of DAH<sub>30</sub>; this is  
6 arguably appropriate because perioperative studies should weight this as the most extreme  
7 adverse outcome. More sophisticated modelling could jointly model the risk of death and  
8 DAH<sub>30</sub> in those discharged alive, and such modelling would be particularly important if the  
9 in-hospital mortality rate is moderate or greater. Third, different health care settings can be  
10 expected to have varied casemix and hospital discharge processes, and hospital discharge  
11 may be delayed because of social and process issues unrelated to complications or quality of  
12 care. DAH<sub>30</sub> should therefore be risk-adjusted.<sup>58</sup> Fourth, DAH<sub>30</sub> doesn't provide specific  
13 information on which aspects of in-hospital or post-discharge management influences  
14 where patients reside after hospitalization, or the post-discharge use and effectiveness of  
15 family physician or other health care resources. Fifth, DAH<sub>30</sub> is an overall measure of  
16 recovery profile and does not inform us about specific complications, level of functioning or  
17 wellbeing. Such aspects should also be included when conducting outcome studies. Sixth,  
18 obtaining accurate data on days spent in a rehabilitation facility relies on further follow-up  
19 or accurate electronic records. Future studies using DAH<sub>30</sub> should prospectively plan to  
20 reliably obtain such data.  
21  
22  
23  
24  
25  
26  
27  
28  
29  
30  
31  
32  
33  
34  
35  
36  
37  
38  
39  
40  
41  
42  
43  
44  
45  
46  
47

## 48 CONCLUSIONS

49 DAH<sub>30</sub> has construct validity and is a readily-obtainable, generic, patient-centred outcome  
50 measure that can better inform patients and physicians when planning surgery. It is a  
51 suitable outcome measure for both quality improvement and perioperative clinical trials.  
52 DAH<sub>30</sub> accounts for prolonged hospital stay, discharge to any post-acute care nursing facility,  
53  
54  
55  
56  
57  
58  
59  
60

1  
2  
3 rehospitalizations, and early deaths. It thus captures much of the patient-centred  
4  
5 experience, and will be maximal when effective and efficient care is achieved.  
6  
7

8  
9  
10  
11 **Contributor statement:** PM designed the study, oversaw the ethics application, devised the  
12  
13 statistical analysis plan, and drafted and revised the paper. He is guarantor. MS provided  
14  
15 intellectual input into the study design, and drafted and revised the paper. SH analysed the  
16  
17 data and drafted and revised the paper. SW prepared the ethics application, monitored the  
18  
19 data entry and checking, and drafted and revised the paper. DM provided intellectual input  
20  
21 into the study design, and drafted and revised the paper. SM provided intellectual input into  
22  
23 the study design, and drafted and revised the paper. IS retrieved and entered all study data,  
24  
25 and revised the paper. AF contributed to the statistical analysis, and drafted and revised the  
26  
27 paper.  
28  
29  
30  
31

32  
33  
34  
35 **Transparency declaration:** The lead author\* affirms that this manuscript is an honest,  
36  
37 accurate, and transparent account of the study being reported; that no important aspects of  
38  
39 the study have been omitted; and that any discrepancies from the study as planned have  
40  
41 been explained.  
42  
43  
44  
45

46  
47  
48 **Acknowledgment:** The authors would like to thank the study participants for their interest  
49  
50 and preparedness to consent to the original trials. PM is supported in part by Practitioner  
51  
52 Fellowships from the Australian National Health and Medical Research Council (NHMRC).  
53  
54  
55  
56  
57  
58  
59  
60

1  
2  
3 **Funding:** This work was supported by the Australian NHMRC, the New Zealand Health  
4  
5 Research Council, and the Australian and New Zealand College of Anaesthetists, and  
6  
7 Monash University (Melbourne, Australia).  
8  
9

10  
11  
12  
13 **Additional data:** No additional data available.  
14

15  
16 **Competing interests:** None of the authors have any conflicts of interest  
17

18  
19 **Ethics approval:** This trial has been approved by the Ethics Committee of Alfred Health,  
20  
21 Melbourne, Australia.  
22  
23  
24  
25  
26  
27  
28  
29  
30  
31  
32  
33  
34  
35  
36  
37  
38  
39  
40  
41  
42  
43  
44  
45  
46  
47  
48  
49  
50  
51  
52  
53  
54  
55  
56  
57  
58  
59  
60

## References

1. Austin JM, McGlynn EA, Pronovost PJ. Fostering Transparency in Outcomes, Quality, Safety, and Costs. *Jama* 2016 doi: 10.1001/jama.2016.14039 [published Online First: 2016/09/27]
2. Lynn J, McKethan A, Jha AK. Value-Based Payments Require Valuing What Matters to Patients. *JAMA* 2015;314(14):1445-6. doi: 10.1001/jama.2015.8909
3. Porter ME. What is value in health care? *N Engl J Med* 2010;363(26):2477-81. doi: 10.1056/NEJMp1011024 [published Online First: 2010/12/15]
4. Lavalley DC, Chenok KE, Love RM, et al. Incorporating Patient-Reported Outcomes Into Health Care To Engage Patients And Enhance Care. *Health Aff (Millwood)* 2016;35(4):575-82. doi: 10.1377/hlthaff.2015.1362 [published Online First: 2016/04/06]
5. Berian JR, Mohanty S, Ko CY, et al. Association of Loss of Independence With Readmission and Death After Discharge in Older Patients After Surgical Procedures. *JAMA Surg* 2016;151(9):e161689. doi: 10.1001/jamasurg.2016.1689 [published Online First: 2016/07/14]
6. Fried TR, Bradley EH, Towle VR, et al. Understanding the treatment preferences of seriously ill patients. *N Engl J Med* 2002;346(14):1061-6. doi: 10.1056/NEJMsa012528
7. Goldfarb M, Drudi L, Almohammadi M, et al. Outcome Reporting in Cardiac Surgery Trials: Systematic Review and Critical Appraisal. *J Am Heart Assoc* 2015;4(8):e002204. doi: 10.1161/jaha.115.002204 [published Online First: 2015/08/19]
8. Chalmers I, Clarke M. Outcomes that matter to patients in tombstone trials. *Lancet* 2001;358(9293):1649. doi: S0140673601066892 [pii] [published Online First: 2001/11/22]
9. Ariti CA, Cleland JG, Pocock SJ, et al. Days alive and out of hospital and the patient journey in patients with heart failure: Insights from the candesartan in heart failure: assessment of reduction in mortality and morbidity (CHARM) program. *Am Heart J* 2011;162(5):900-6. doi: 10.1016/j.ahj.2011.08.003
10. Wasywich CA, Gamble GD, Whalley GA, et al. Understanding changing patterns of survival and hospitalization for heart failure over two decades in New Zealand: utility of 'days alive and out of hospital' from epidemiological data. *Eur J Heart Fail* 2010;12(5):462-8. doi: 10.1093/eurjhf/hfq027
11. Xian Y, Wu J, O'Brien EC, et al. Real world effectiveness of warfarin among ischemic stroke patients with atrial fibrillation: observational analysis from Patient-Centered Research into Outcomes Stroke Patients Prefer and Effectiveness Research (PROSPER) study. *BMJ* 2015;351:h3786. doi: 10.1136/bmj.h3786
12. Ellis G, Whitehead MA, Robinson D, et al. Comprehensive geriatric assessment for older adults admitted to hospital: meta-analysis of randomised controlled trials. *Bmj* 2011;343:d6553. doi: 10.1136/bmj.d6553 [published Online First: 2011/10/29]
13. Hyder JA, Hirschberg RE, Nguyen LL. Home discharge as a performance metric for surgery. *JAMA Surg* 2015;150(2):96-7. doi: 10.1001/jamasurg.2014.1725 [published Online First: 2014/12/05]
14. Hyder JA, Wakeam E, Habermann EB, et al. Derivation and validation of a simple calculator to predict home discharge after surgery. *J Am Coll Surg* 2014;218(2):226-36. doi: 10.1016/j.jamcollsurg.2013.11.002
15. Merkow RP, Ju MH, Chung JW, et al. Underlying reasons associated with hospital readmission following surgery in the United States. *JAMA* 2015;313(5):483-95. doi: 10.1001/jama.2014.18614
16. Boney O, Bell M, Bell N, et al. Identifying research priorities in anaesthesia and perioperative care: final report of the joint National Institute of Academic Anaesthesia/James Lind Alliance Research Priority Setting Partnership. *BMJ Open* 2015;5(12):e010006. doi: 10.1136/bmjopen-2015-010006 [published Online First: 2015/12/18]
17. Hinami K, Bilimoria KY, Kallas PG, et al. Patient experiences after hospitalizations for elective surgery. *Am J Surg* 2014;207(6):855-62. doi: 10.1016/j.amjsurg.2013.04.014

- 1  
2  
3 18. Burns KE, Jacob SK, Aguirre V, et al. Stakeholder Engagement in Trial Design: Survey of Visitors to  
4 Critically Ill Patients Regarding Preferences for Outcomes and Treatment Options during  
5 Weaning from Mechanical Ventilation. *Ann Am Thorac Soc* 2016;13(11):1962-68. doi:  
6 10.1513/AnnalsATS.201606-445OC [published Online First: 2016/09/07]  
7  
8 19. Hannah D, Lindholm B, Maisch L. Certain uncertainty: life after stroke from the patient's  
9 perspective. *Circ Cardiovasc Qual Outcomes* 2014;7(6):968-9. doi:  
10 10.1161/CIRCOUTCOMES.114.001315  
11  
12 20. Xian Y, O'Brien EC, Fonarow GC, et al. Patient-Centered Research into Outcomes Stroke Patients  
13 Prefer and Effectiveness Research: Implementing the patient-driven research paradigm to  
14 aid decision making in stroke care. *Am Heart J* 2015;170(1):36-45, 45.e1-11. doi:  
15 10.1016/j.ahj.2015.04.008 [published Online First: 2015/06/22]  
16  
17 21. von Elm E, Altman DG, Egger M, et al. The Strengthening the Reporting of Observational Studies  
18 in Epidemiology (STROBE) statement: guidelines for reporting observational studies. *Lancet*  
19 2007;370(9596):1453-7. doi: 10.1016/S0140-6736(07)61602-X  
20  
21 22. Myles PS, Leslie K, Chan MT, et al. The safety of addition of nitrous oxide to general anaesthesia  
22 in at-risk patients having major non-cardiac surgery (ENIGMA-II): a randomised, single-blind  
23 trial. *Lancet* 2014;384(9952):1446-54. doi: 10.1016/s0140-6736(14)60893-x [published  
24 Online First: 2014/08/22]  
25  
26 23. Myles PS, Smith JA, Forbes A, et al. Stopping vs. Continuing Aspirin before Coronary Artery  
27 Surgery. *N Engl J Med* 2016;374(8):728-37. doi: 10.1056/NEJMoa1507688  
28  
29 24. Myles PS, Smith JA, Forbes A, et al. Tranexamic acid in coronary artery surgery. *N Engl J Med*  
30 2017;2017(376):136-48.  
31  
32 25. Thompson EG, Gower ST, Beilby DS, et al. Enhanced recovery after surgery program for elective  
33 abdominal surgery at three Victorian hospitals. *Anaesth Intensive Care* 2012;40(3):450-9.  
34 [published Online First: 2012/05/15]  
35  
36 26. Christelis N, Wallace S, Sage CE, et al. An enhanced recovery after surgery program for hip and  
37 knee arthroplasty. *Med J Aust* 2015;202(7):363-8.  
38  
39 27. Glassford NJ, Myles P, Bellomo R. The Australian approach to peri-operative fluid balance. *Curr*  
40 *Opin Anaesthesiol* 2012;25(1):102-10. doi: 10.1097/ACO.0b013e32834decd7 [published  
41 Online First: 2011/11/25]  
42  
43 28. Vijay A, Grover A, Coulson T, et al. Perioperative management of patients treated with  
44 angiotensin-converting enzyme inhibitors and angiotensin II receptor blockers. *Anaesth*  
45 *Intensive Care* 2016;in press  
46  
47 29. Shulman MA, Myles PS, Chan MT, et al. Measurement of disability-free survival after surgery.  
48 *Anesthesiology* 2015;122(3):524-36. doi: 10.1097/ALN.0000000000000586  
49  
50 30. Mangram A, Horan T, Pearson M, et al. Guideline for prevention of surgical site infection, 1999.  
51 *Infection Control and Hospital Epidemiology* 1999;20:247-77.  
52  
53 31. Degnim AC, Throckmorton AD, Boostrom SY, et al. Surgical site infection after breast surgery:  
54 impact of 2010 CDC reporting guidelines. *Ann Surg Oncol* 2012;19(13):4099-103. doi:  
55 10.1245/s10434-012-2448-6  
56  
57 32. Thygesen K, Alpert JS, Jaffe AS, et al. Third universal definition of myocardial infarction.  
58 *Circulation* 2012;126(16):2020-35. doi: 10.1161/CIR.0b013e31826e1058  
59  
60 CIR.0b013e31826e1058 [pii] [published Online First: 2012/08/28]  
33. Leonardi S, Armstrong PW, Schulte PJ, et al. Implementation of standardized assessment and  
reporting of myocardial infarction in contemporary randomized controlled trials: a  
systematic review. *Eur Heart J* 2013;34(12):894-902d. doi: 10.1093/eurheartj/ehh003  
ehh003 [pii] [published Online First: 2013/01/29]  
34. WMA Declaration of Helsinki - Ethical Principles for Medical Research Involving Human Subjects.  
Available from [www.wma.net/en/30publications/10policies/b3/index.html](http://www.wma.net/en/30publications/10policies/b3/index.html) (accessed 17  
October 2012).



- 1  
2  
3 35. Caironi P, Tognoni G, Masson S, Fumagalli R, Persenti A, Romero M, et al. Albumin replacement  
4 in patients with severe sepsis or septic shock. *N Engl J Med*. 2014. doi:  
5 10.1056/NEJMoa1305727.  
6  
7 36. Koenker R, Bassett G. Regression quantiles. *Econometrica* 1978;46:33–50.  
8  
9 37. Wu CFJ. Jackknife, bootstrap and other resampling methods in regression analysis. *Ann Stat*  
10 1986;14:1261-350.  
11  
12 38. He X, Hu F. Markov chain marginal bootstrap. *J Am Stat Assoc* 2002;97:783-95.  
13  
14 39. Koenker R, Machado JAF. Goodness of fit and related inference processes for quantile  
15 regression. *Journal of the American Statistical Association* 1999;94:1296–310.  
16  
17 40. Gornall BF, Myles PS, Smith CL, et al. Measurement of quality of recovery using the QoR-40: a  
18 quantitative systematic review. *Br J Anaesth* 2013;111(2):161-9. doi: 10.1093/bja/aet014  
19  
20 aet014 [pii] [published Online First: 2013/03/09]  
21  
22 41. Liu VX, Rosas E, Hwang J, et al. Enhanced Recovery After Surgery Program Implementation in 2  
23 Surgical Populations in an Integrated Health Care Delivery System. *JAMA Surg*  
24 2017:e171032. doi: 10.1001/jamasurg.2017.1032 [published Online First: 2017/05/12]  
25  
26 42. Yadla S, Ghobrial GM, Campbell PG, et al. Identification of complications that have a significant  
27 effect on length of stay after spine surgery and predictive value of 90-day readmission rate. *J*  
28 *Neurosurg Spine* 2015;23(6):807-11. doi: 10.3171/2015.3.spine14318 [published Online  
29 First: 2015/09/01]  
30  
31 43. Berwick DM, Nolan TW, Whittington J. The triple aim: care, health, and cost. *Health Aff*  
32 *(Millwood)* 2008;27(3):759-69. doi: 10.1377/hlthaff.27.3.759  
33  
34 44. Lee VS, Kawamoto K, Hess R, et al. Implementation of a Value-Driven Outcomes Program to  
35 Identify High Variability in Clinical Costs and Outcomes and Association With Reduced Cost  
36 and Improved Quality. *Jama* 2016;316(10):1061-72. doi: 10.1001/jama.2016.12226  
37 [published Online First: 2016/09/14]  
38  
39 45. Bauer M, Fitzgerald L, Haesler E, et al. Hospital discharge planning for frail older people and their  
40 family. Are we delivering best practice? A review of the evidence. *J Clin Nurs*  
41 2009;18(18):2539-46. doi: 10.1111/j.1365-2702.2008.02685.x [published Online First:  
42 2009/04/21]  
43  
44 46. Birkmeyer JD, Gust C, Dimick JB, et al. Hospital quality and the cost of inpatient surgery in the  
45 United States. *Ann Surg* 2012;255(1):1-5. doi: 10.1097/SLA.0b013e3182402c17  
46  
47 47. Jencks SF, Williams MV, Coleman EA. Rehospitalizations among patients in the Medicare fee-for-  
48 service program. *N Engl J Med* 2009;360(14):1418-28. doi: 10.1056/NEJMsa0803563  
49  
50 48. Zuckerman RB, Sheingold SH, Orav EJ, et al. Readmissions, Observation, and the Hospital  
51 Readmissions Reduction Program. *N Engl J Med* 2016;374(16):1543-51. doi:  
52 10.1056/NEJMsa1513024  
53  
54 49. Danino JF, Taylor T, Metcalfe CW, et al. Readmission rates and financial penalties after ear, nose  
55 and throat surgery: how can we improve? *Br J Hosp Med (Lond)* 2015;76(11):655-7. doi:  
56 10.12968/hmed.2015.76.11.655  
57  
58 50. Hannan EL, Zhong Y, Lahey SJ, et al. 30-Day Readmissions After Coronary Artery Bypass Graft  
59 Surgery in New York State. *JACC: Cardiovascular Interventions* 2011;4(5):569-76. doi:  
60 <http://dx.doi.org/10.1016/j.jcin.2011.01.010>  
51  
52 51. Ahmed J, Khan S, Lim M, et al. Enhanced recovery after surgery protocols - compliance and  
53 variations in practice during routine colorectal surgery. *Colorectal Dis* 2012;14(9):1045-51.  
54 doi: 10.1111/j.1463-1318.2011.02856.x [published Online First: 2011/10/12]  
55  
56 52. Group EC. The Impact of Enhanced Recovery Protocol Compliance on Elective Colorectal Cancer  
57 Resection: Results From an International Registry. *Ann Surg* 2015;261(6):1153-9. doi:  
58 10.1097/SLA.0000000000001029  
59  
60 53. Myles PS, Devereaux PJ. Pros and cons of composite endpoints in anesthesia trials.  
*Anesthesiology* 2010;113(4):776-8. doi: 10.1097/ALN.0b013e3181ee2ceb [published Online  
First: 2010/09/03]



- 1  
2  
3 54. Ferreira-Gonzalez I, Permanyer-Miralda G, Busse JW, et al. Composite outcomes can distort the  
4 nature and magnitude of treatment benefits in clinical trials. *Ann Intern Med*  
5 2009;150(8):566-7. doi: 150/8/566-b [pii] [published Online First: 2009/04/22]  
6  
7 55. Pogue J, Thabane L, Devereaux PJ, et al. Testing for heterogeneity among the components of a  
8 binary composite outcome in a clinical trial. *BMC Med Res Methodol* 2010;10:49. doi:  
9 10.1186/1471-2288-10-49  
10  
11 56. Khuri SF, Henderson WG, DePalma RG, et al. Determinants of long-term survival after major  
12 surgery and the adverse effect of postoperative complications. *Ann Surg* 2005;242(3):326-  
13 41; discussion 41-3. doi: 00000658-200509000-00004 [pii] [published Online First:  
14 2005/09/02]  
15  
16 57. Myles PS, Peyton P, Silbert B, et al. Perioperative epidural analgesia for major abdominal surgery  
17 for cancer and recurrence-free survival: randomised trial. *BMJ* 2011;342:d1491. doi:  
18 10.1136/bmj.d1491  
19  
20 bmj.d1491 [pii] [published Online First: 2011/03/31]  
21  
22 58. Sheingold SH, Zuckerman R, Shartz A. Understanding Medicare Hospital Readmission Rates  
23 And Differing Penalties Between Safety-Net And Other Hospitals. *Health Aff (Millwood)*  
24 2016;35(1):124-31. doi: 10.1377/hlthaff.2015.0534  
25  
26  
27  
28  
29  
30  
31  
32  
33  
34  
35  
36  
37  
38  
39  
40  
41  
42  
43  
44  
45  
46  
47  
48  
49  
50  
51  
52  
53  
54  
55  
56  
57  
58  
59  
60

1  
2  
3 **Legend**  
4

5 **Figure 1. Frequency Distribution of Days at Home up to 30 Days after Surgery (n=2109).**  
6 **The smoothing line (kernel) is a non-parametric estimate of the probability density**  
7 **function.**  
8  
9  
10  
11  
12  
13  
14  
15  
16  
17  
18  
19  
20  
21  
22  
23  
24  
25  
26  
27  
28  
29  
30  
31  
32  
33  
34  
35  
36  
37  
38  
39  
40  
41  
42  
43  
44  
45  
46  
47  
48  
49  
50  
51  
52  
53  
54  
55  
56  
57  
58  
59  
60

For peer review only

**Table 1. Days at Home up to 30 Days after Surgery (DAH<sub>30</sub>) According to Types of Surgery.**

| Surgery                        | No. of patients | No. admitted to a rehabilitation hospital (%) | Median (95% CI) DAH <sub>30</sub> <sup>†</sup> |
|--------------------------------|-----------------|-----------------------------------------------|------------------------------------------------|
| Cardiac                        | 679             | 54 (8.0)                                      | 22.8 (22.6-22.9)                               |
| Orthopaedic                    | 289             | 122 (42)                                      | 21.9 (21.2-22.6)                               |
| Neurosurgery                   | 220             | 9 (4.0)                                       | 22.8 (22.2-23.5)                               |
| Colorectal                     | 118             | 8 (6.8)                                       | 24.9 (23.9-26.0)                               |
| Urology                        | 315             | 26 (8.3)                                      | 23.8 (23.0-24.5)                               |
| Vascular                       | 56              | 1 (1.8)                                       | 26.0 (24.3-27.3)                               |
| Ear, nose, throat              | 99              | 17 (17)                                       | 25.8 (24.9-27.0)                               |
| Oesophagogastric/hepatobiliary | 253             | 4 (1.6)                                       | 24.9 (23.8-26.1)                               |
| Thoracic                       | 28              | 2 (7.1)                                       | 22.8 (17.8-27.8)                               |
| Other                          | 52              | 2 (3.8)                                       | 28.8 (27.7-30.0)                               |

<sup>†</sup> hospital days do not include those spent in a rehabilitation facility

**Table 2. Days at Home up to 30 Days after Surgery (DAH<sub>30</sub>) According to Patient and Perioperative Characteristics.**

| Variable               | no. (%)   | Raw median DAH <sub>30</sub> (95% CI) | P value | Adjusted median DAH <sub>30</sub> (95% CI) <sup>†</sup> | P-value |
|------------------------|-----------|---------------------------------------|---------|---------------------------------------------------------|---------|
| Patient age            |           |                                       | <0.001  |                                                         | <0.001  |
| <50 years              | 220 (11)  | 24.9 (24.4 - 25.4)                    |         | 24.8 (24.4 - 25.2)                                      |         |
| 50-60 years            | 396 (19)  | 24.0 (23.4 - 24.6)                    |         | 24.4 (24.0 - 24.9)                                      |         |
| 60-70 years            | 612 (29)  | 23.9 (23.8 - 24.0)                    |         | 24.0 (23.6 - 24.3)                                      |         |
| 70-80 years            | 653 (31)  | 22.8 (22.6 - 23.0)                    |         | 23.0 (22.7 - 23.4)                                      |         |
| ≥80 years              | 228 (11)  | 22.7 (22.0 - 23.5)                    |         | 22.2 (21.7 - 22.7)                                      |         |
| Sex                    |           |                                       | 0.042   |                                                         | 0.14    |
| Male                   | 1427 (68) | 23.7 (23.1 - 24.2)                    |         | 23.7 (23.5 - 24.0)                                      |         |
| Female                 | 682 (32)  | 24.0 (23.7 - 24.2)                    |         | 23.5 (23.2 - 23.8)                                      |         |
| Smoker                 |           |                                       | 0.094   |                                                         |         |
| yes                    | 787 (37)  | 23.2 (22.6 - 23.8)                    |         | not done                                                |         |
| no                     | 1322 (63) | 23.8 (23.7 - 23.9)                    |         | not done                                                |         |
| Diabetes               |           |                                       | 0.003   |                                                         |         |
| yes                    | 697 (33)  | 23.0 (22.4 - 23.6)                    |         | not done                                                |         |
| no                     | 1412 (67) | 23.8 (23.8 - 23.9)                    |         | not done                                                |         |
| Heart failure          |           |                                       | 0.002   |                                                         |         |
| yes                    | 365 (17)  | 22.9 (22.4 - 23.4)                    |         | not done                                                |         |
| no                     | 1744 (83) | 23.8 (23.7 - 23.9)                    |         | not done                                                |         |
| ASA physical status    |           |                                       | <0.001  |                                                         | <0.001  |
| 1                      | 41 (1.9)  | 28.0 (26.3 - 29.7)                    |         | 25.9 (25.1 - 26.6)                                      |         |
| 2                      | 530 (25)  | 25.0 (24.7 - 25.3)                    |         | 24.4 (24.0 - 24.7)                                      |         |
| 3                      | 1024 (51) | 23.7 (23.1 - 24.3)                    |         | 23.6 (23.2 - 23.9)                                      |         |
| 4                      | 510 (24)  | 22.0 (21.4 - 22.5)                    |         | 23.0 (22.6 - 23.3)                                      |         |
| Duration of Surgery, h |           |                                       | <0.001  |                                                         | <0.001  |
| <2.0                   | 581 (29)  | 25.9 (25.7 - 26.1)                    |         | 25.6 (25.2 - 26.0)                                      |         |
| 2.0-2.99               | 412 (20)  | 24.0 (23.5 - 24.5)                    |         | 24.0 (23.7 - 24.3)                                      |         |
| 3.0-3.99               | 551 (26)  | 22.9 (22.8 - 23.1)                    |         | 23.1 (22.7 - 23.4)                                      |         |
| ≥4.0                   | 565 (27)  | 21.9 (21.4 - 22.3)                    |         | 22.0 (21.6 - 22.5)                                      |         |

<sup>†</sup>covariates including in the multivariable adjustment were: patient age, sex, American Society of Anesthesiologists (ASA) physical status and duration of surgery

**Table 3. Median (95% CI) Days at Home up to 30 Days after Surgery According to Postoperative Complications.**

| Variable (no. [%])                  | No. with complete data | Yes                | No                 | P value† |
|-------------------------------------|------------------------|--------------------|--------------------|----------|
| Myocardial infarction (120 [6.5])   | 1846                   | 20.8 (19.2 - 22.4) | 23.8 (23.7 - 23.9) | <0.001   |
| Stroke (13 [0.7])                   | 1846                   | 10.1 (2.5 - 17.7)  | 23.8 (23.5 - 24.0) | <0.001   |
| Pulmonary embolism (7 [0.4])        | 1846                   | 17.1 (8.4 - 25.9)  | 23.7 (23.5 - 24.0) | 0.012    |
| Cardiac arrest (3 [0.2])            | 1846                   | 17.7 (0.9 - 34.5)  | 23.7 (23.5 - 24.0) | 0.018    |
| Surgical site infection (129 [7.0]) | 1846                   | 21.0 (19.0 - 23.0) | 23.8 (23.7 - 23.9) | <0.001   |
| Any of the above (263 [14.2])       | 1846                   | 20.5 (19.1 - 21.9) | 23.9 (23.8 - 23.9) | <0.001   |
| Hospital readmission (150 [7.1])    | 2090                   | 17.9 (16.3 - 19.5) | 23.9 (23.8 - 23.9) | <0.001   |

† P values calculated using the quasi-likelihood ratio test.

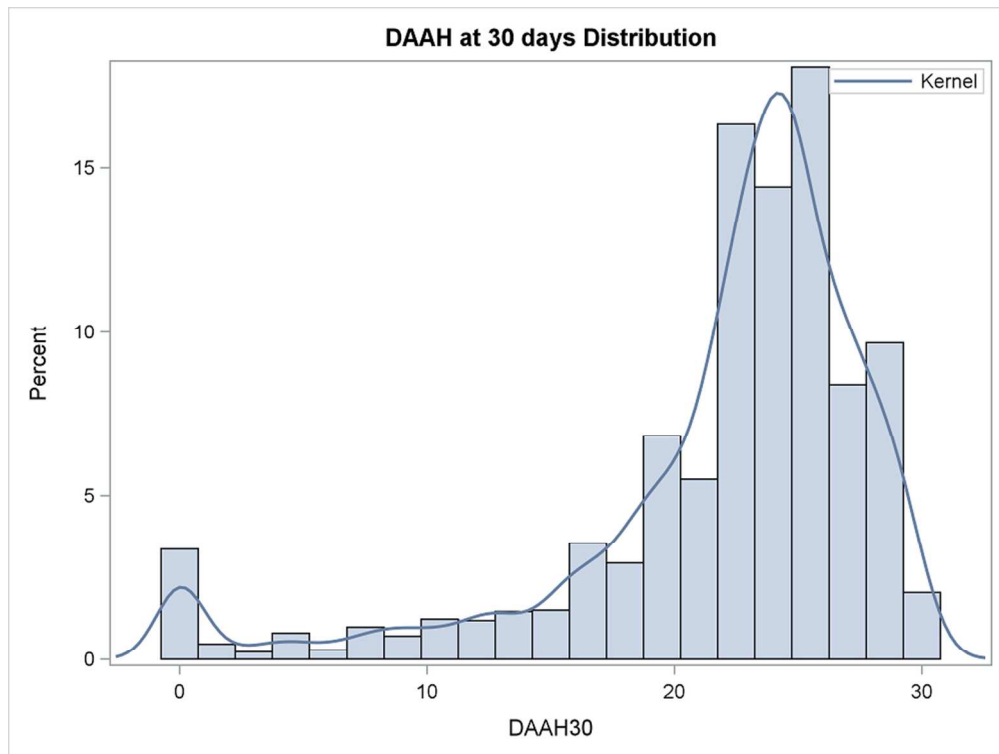

Figure 1. Frequency Distribution of Days at Home up to 30 Days after Surgery (n=2109). The smoothing line (kernel) is a non-parametric estimate of the probability density function.

84x63mm (300 x 300 DPI)

Peer Review Only

## Supplementary Appendix

This appendix has been provided by the authors to give readers additional information about their work.

Supplement to: Days Alive and at Home after Surgery

|                                                                                                                                                                                                                 | Page |
|-----------------------------------------------------------------------------------------------------------------------------------------------------------------------------------------------------------------|------|
| <b>Proposed method of calculation of “days at home within 30 days of surgery” (DAH<sub>30</sub>)</b>                                                                                                            | 2    |
| <b>Table S1.</b> Trial data sources                                                                                                                                                                             | 3    |
| <b>Figure S1.</b> The impact of the quantile (50 <sup>th</sup> – 75 <sup>th</sup> percentile) choice for DAH <sub>30</sub>                                                                                      | 4    |
| <b>Table S2.</b> Third quartile (Q3) days at home up to 30 days after surgery (DAH <sub>30</sub> ) according to patient and perioperative characteristics                                                       | 5    |
| <b>Table S3.</b> Third quartile (Q3) (95% CI) days at home up to 30 days after surgery according to postoperative complications                                                                                 | 6    |
| <b>Table S4.</b> Days at home up to 30 days after surgery (DAH <sub>30-rehab</sub> ), assuming 5 days’ admission to a rehabilitation facility if it occurred, according to types of surgery.                    | 7    |
| <b>Table S5.</b> Days at home up to 30 days after surgery (DAH <sub>30</sub> ), assuming 5 days’ admission to a rehabilitation facility if it occurred, according to patient and perioperative characteristics  | 8    |
| <b>Table S6.</b> Median (95% CI) days at home up to 30 days after surgery, assuming 5 days’ admission to a rehabilitation facility if it occurred, according to postoperative complications                     | 9    |
| <b>Table S7.</b> Days at home up to 30 days after surgery (DAH <sub>30-rehab</sub> ), assuming 14 days’ admission to a rehabilitation facility if it occurred, according to types of surgery.                   | 10   |
| <b>Table S8.</b> Days at home up to 30 days after surgery (DAH <sub>30</sub> ), assuming 14 days’ admission to a rehabilitation facility if it occurred, according to patient and perioperative characteristics | 11   |
| <b>Table S9.</b> Median (95% CI) days at home up to 30 days after surgery, assuming 14 days’ admission to a rehabilitation facility if it occurred, according to postoperative complications                    | 12   |

### Proposed Method of Calculation of “Days at Home within 30 days of Surgery” (DAH<sub>30</sub>)

DAH<sub>30</sub> is a composite measure incorporating hospital length of stay in the hospital following the index surgery, re-admission to either the index or any other hospital, and including post-acute hospital discharge to a rehabilitation centre/hospital or other nursing facility, and early deaths after surgery, into a single outcome metric.

DAH<sub>30</sub> is a numerical outcome measure that provides greater statistical power to detect clinically important differences in outcome. It is likely that a 0.5 day difference would be clinically important and valued by most people. A hospital bed day has been costed at £400 by the NHS in the UK, and \$1800 in the US. It has the potential to increase the available hospital beds by about 8%.

By its very nature, DAH<sub>30</sub> will be left-skewed with a spike at 0 (reflecting in-hospital deaths and those still admitted to hospital or other nursing facility at 30 days after surgery).

DAH<sub>30</sub> is calculated using mortality and hospitalisation data from the date of the index surgery (= Day 0). For example, if a patient died on day 2 after their surgery whilst still an inpatient, they would be assigned 0 DAH<sub>30</sub>; if a patient was discharged from hospital on Day 6 after surgery but was subsequently readmitted for 4 days before their second hospital discharge, then they would be assigned 20 DAH<sub>30</sub>. If a patient has complications and spends 16 days in hospital, and then is transferred to a nursing facility for rehabilitation, and spend 24 days there before finally being discharged to their own home, they would be assigned 0 DAH<sub>30</sub>. (30-16-24 = -10, but the minimum value of DAH<sub>30</sub> should be zero\*).

Patients having a planned re-admission (eg. removal of a stent or secondary closure of a fistula) within 30 days of surgery should have these days subtracted from the total DAH<sub>30</sub>. That is, if a patient is discharged from hospital on Day 13, and is electively re-admitted two weeks later (Day 27) for a further 2 days, their DAH<sub>30</sub> will be calculated as 30-13-2 (=15).

**Important:** If a patient dies within 30 days of surgery, irrespective of whether they have spent some time at home, DAH<sub>30</sub> should be scored as zero (0).

\*an alternative would be to use DAH<sub>90</sub> (up to 90 days after surgery) as an outcome metric in circumstances where a longer postoperative recovery is expected.



**Table S1. Trial Data Sources**

| Trial                                                                                                                                                                | N   | Reference                               |
|----------------------------------------------------------------------------------------------------------------------------------------------------------------------|-----|-----------------------------------------|
| 1. Tranexamic acid in coronary artery surgery                                                                                                                        | 613 | N Engl J Med 2016; Oct                  |
| 2. The safety of addition of nitrous oxide to general anaesthesia in at-risk patients having major non-cardiac surgery (ENIGMA-II): a randomised, single-blind trial | 516 | Lancet 2014; 384:1446-54.               |
| 3. An enhanced recovery after surgery (ERAS) program for hip and knee arthroplasty                                                                                   | 310 | Med J Aust 2015; 202:363-8.             |
| 4. Experience of an enhanced recovery after surgery (ERAS) program for elective abdominal surgery                                                                    | 71  | Anaesth Intensive Care 2012; 40:450-9.  |
| 5. The measurement of disability-free survival after surgery                                                                                                         | 163 | Anesthesiology 2015; 122:524-36.        |
| 6. Perioperative management of patients treated with angiotensin converting enzyme inhibitors and angiotensin II receptor blockers: a quality improvement audit      | 263 | Anaesth Intensive Care 2016; 44:346-52. |
| 7. Restrictive versus liberal fluid therapy in major abdominal surgery                                                                                               | 173 | ClinicalTrials.gov NCT01424150          |

**Figure S1.** The impact of the quantile (50<sup>th</sup> – 75<sup>th</sup> percentile) choice for days at home up to 30 days (here, DAAH30) on the associations of patient age category, ASA physical status and surgical duration, demonstrating the covariates are reasonably stable over this range.

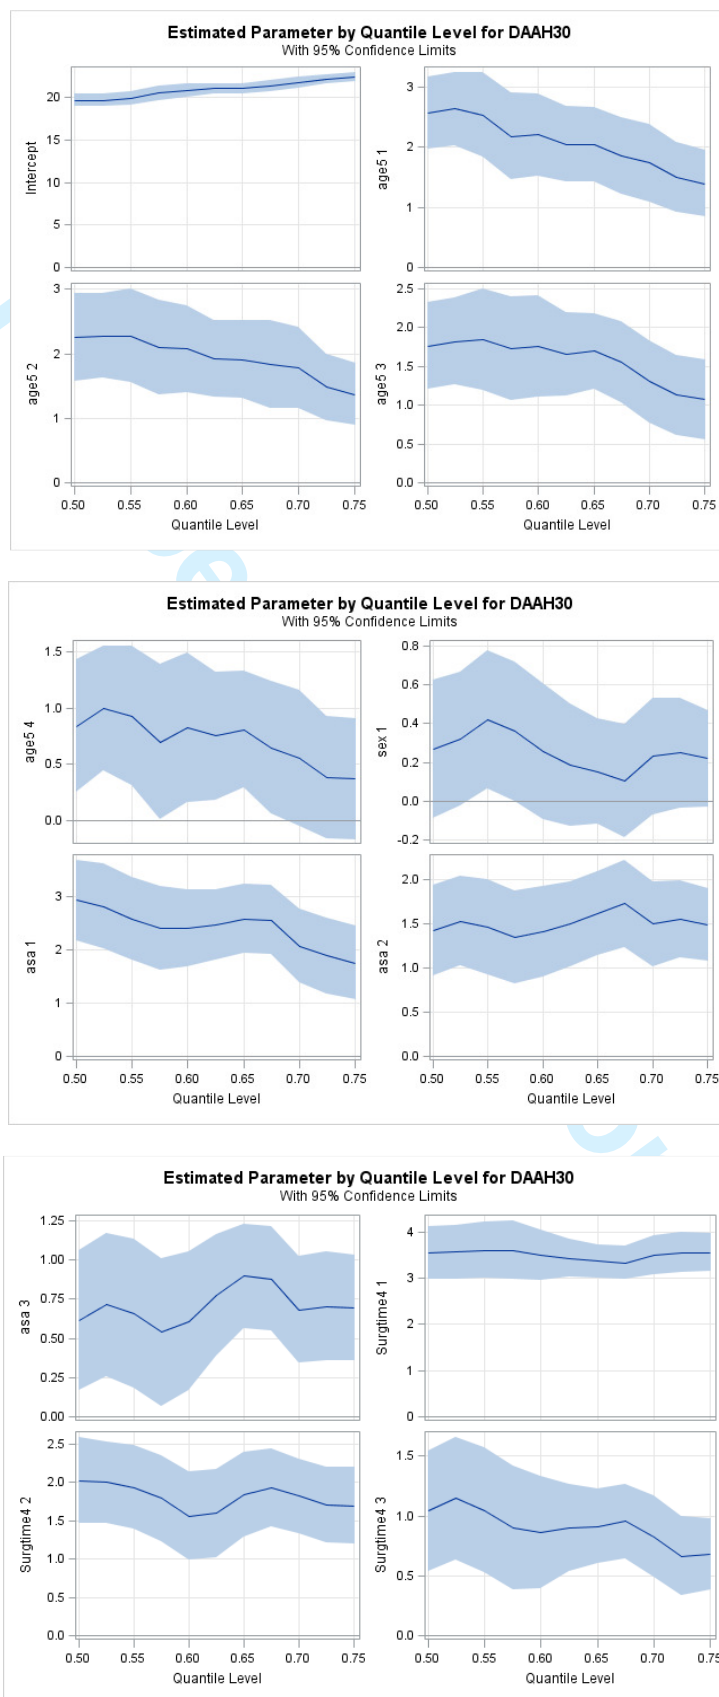

**Table S2. Third Quartile (Q3) Days at Home up to 30 Days after Surgery (DAH<sub>30</sub>) According to Patient and Perioperative Characteristics.#**

| Variable               | no. (%)   | Raw Q3<br>DAH <sub>30</sub> (95% CI) | P value | Adjusted Q3<br>DAH <sub>30</sub> (95% CI)* | P-value |
|------------------------|-----------|--------------------------------------|---------|--------------------------------------------|---------|
| Patient age            |           |                                      |         |                                            |         |
| <50 years              | 220 (11)  | 27.2 ( 26.5 , 27.9 )                 | <.0001  | 26.1 ( 25.8 , 26.5 )                       | <0.0001 |
| 50-60 years            | 396 (19)  | 25.9 ( 25.5 , 26.4 )                 |         | 26.1 ( 25.9 , 26.4 )                       |         |
| 60-70 years            | 612 (29)  | 25.7 ( 25.0 , 26.4 )                 |         | 25.8 ( 25.6 , 26.1 )                       |         |
| 70-80 years            | 653 (31)  | 25.0 ( 24.6 , 25.4 )                 |         | 25.1 ( 24.8 , 25.4 )                       |         |
| ≥80 years              | 228 (11)  | 24.8 ( 24.3 , 25.3 )                 |         | 24.7 ( 24.1 , 25.4 )                       |         |
| Sex                    |           |                                      |         |                                            |         |
| Male                   | 1427 (68) | 25.1 ( 24.8 , 25.4 )                 | <.0001  | 25.6 ( 25.5 , 25.8 )                       | 0.146   |
| Female                 | 682 (32)  | 26.2 ( 25.6 , 26.8 )                 |         | 25.4 ( 25.2 , 25.7 )                       |         |
| Smoker                 |           |                                      |         |                                            |         |
| yes                    | 787 (37)  | 25.0 ( 24.8 , 25.1 )                 | <.0001  | not done                                   |         |
| no                     | 1322 (63) | 26.0 ( 25.7 , 26.2 )                 |         | not done                                   |         |
| Diabetes               |           |                                      |         |                                            |         |
| yes                    | 697 (33)  | 25.8 ( 25.1 , 26.5 )                 | >.99    | not done                                   |         |
| no                     | 1412 (67) | 25.8 ( 25.6 , 26.0 )                 |         | not done                                   |         |
| Heart failure          |           |                                      |         |                                            |         |
| yes                    | 365 (17)  | 25.9 ( 25.2 , 26.7 )                 | 0.39    | not done                                   |         |
| no                     | 1744 (83) | 25.8 ( 25.4 , 26.2 )                 |         | not done                                   |         |
| ASA physical status    |           |                                      |         |                                            |         |
| 1                      | 41 (1.9)  | 29.0 ( 28.8 , 29.3 )                 | <.0001  | 26.6 ( 26.0 , 27.2 )                       | <0.0001 |
| 2                      | 530 (25)  | 27.0 ( 26.9 , 27.1 )                 |         | 26.3 ( 26.0 , 26.6 )                       |         |
| 3                      | 1024 (51) | 25.8 ( 25.3 , 26.3 )                 |         | 25.5 ( 25.3 , 25.8 )                       |         |
| 4                      | 510 (24)  | 23.9 ( 23.8 , 24.0 )                 |         | 24.8 ( 24.5 , 25.1 )                       |         |
| Duration of Surgery, h |           |                                      |         |                                            |         |
| <2.0                   | 581 (29)  | 28.1 ( 27.7 , 28.6 )                 | <.0001  | 27.6 ( 27.3 , 28.0 )                       | <0.0001 |
| 2.0-2.99               | 412 (20)  | 26.1 ( 25.6 , 26.5 )                 |         | 25.8 ( 25.4 , 26.2 )                       |         |
| 3.0-3.99               | 551 (26)  | 24.8 ( 24.7 , 24.9 )                 |         | 24.8 ( 24.5 , 25.0 )                       |         |
| ≥4.0                   | 565 (27)  | 23.9 ( 23.8 , 23.9 )                 |         | 24.1 ( 23.8 , 24.4 )                       |         |

# The effect of the different covariates were largely consistent across a large range of meaningful percentile values (e.g. 50<sup>th</sup> – 75<sup>th</sup>) with a slightly smaller effect for age categories as the percentile gets higher but for simplicity we only present the results for Q3 (75<sup>th</sup> percentile). This percentile is also close to the main mode of the distribution.

\*covariates including in the multivariable adjustment were: patient age, sex, American Society of Anesthesiologists (ASA) physical status and duration of surgery

**Table S3. Third Quartile (Q3) (95% CI) Days at Home up to 30 Days after Surgery According to Postoperative Complications.**

| Variable (no. [%])                  | No. with complete data | Yes                | No                 | P value <sup>a</sup> |
|-------------------------------------|------------------------|--------------------|--------------------|----------------------|
| Myocardial infarction (120 [6.5])   | 1846                   | 22.9 (22.2 - 23.5) | 25.8 (25.4 - 26.2) | <0.0001              |
| Stroke (13 [0.7])                   | 1846                   | 18.9 (10.0 - 27.8) | 25.2 (24.6 - 25.7) | 0.019                |
| Pulmonary embolism (7 [0.4])        | 1846                   | 23.1 (16.1 - 30.1) | 25.2 (24.6 - 25.7) | 0.19                 |
| Cardiac arrest (3 [0.2])            | 1846                   | 20.1 (8.0 - 32.1)  | 25.2 (24.6 - 25.7) | 0.052                |
| Surgical site infection (129 [7.0]) | 1846                   | 24.8 (23.7 - 26.0) | 25.3 (24.7 - 25.9) | <0.0001              |
| Any of the above (263 [14.2])       | 1846                   | 23.7 (23.0 - 24.5) | 25.8 (25.6 - 26.1) | <0.0001              |
| Hospital readmission (150 [7.1])    | 2090                   | 21.7 (20.8 - 22.7) | 25.9 (25.8 - 26.0) | <0.0001              |

<sup>a</sup> P values calculated using likelihood ratio test.

**Table S4. Days at Home up to 30 Days after Surgery (DAH<sub>30-rehab</sub>), Assuming 5 Days' Admission to a Rehabilitation Facility if it Occurred, According to Types of Surgery.**

| Surgery                                | No. admitted to a rehabilitation hospital (%) | Mean (95% CI) DAH <sub>30-rehab</sub> |
|----------------------------------------|-----------------------------------------------|---------------------------------------|
| Cardiac (n=679)                        | 54 (8.0)                                      | 22.8 (22.7-22.9)                      |
| Orthopaedic (n=289)                    | 122 (42)                                      | 21.9 (21.2-22.6)                      |
| Neurosurgery (n=220)                   | 9 (4.0)                                       | 22.8 (22.2-23.5)                      |
| Colorectal (n=118)                     | 8 (6.8)                                       | 24.9 (24.1-25.8)                      |
| Urology (n=315)                        | 26 (8.3)                                      | 23.8 (23.0-24.5)                      |
| Vascular (n=56)                        | 1 (1.8)                                       | 26.0 (24.4-27.6)                      |
| Ear, nose, throat (n=99)               | 17 (17)                                       | 25.8 (24.3-27.3)                      |
| Oesophagogastric/hepatobiliary (n=253) | 4 (1.6)                                       | 24.9 (23.8-26.1)                      |
| Thoracic (n=28)                        | 2 (7.1)                                       | 22.8 (17.9-27.8)                      |
| Other (n=52)                           | 2 (3.8)                                       | 28.8 (27.7-30.0)                      |

**Table S5. Days at Home up to 30 Days after Surgery (DAH<sub>30</sub>), Assuming 5 Days' Admission to a Rehabilitation Facility if it Occurred, According to Patient and Perioperative Characteristics.<sup>∞</sup>**

| Variable               | no. (%)   | Raw median<br>DAH <sub>30-rehab</sub> (95% CI) | P value | Adjusted median<br>DAH <sub>30-rehab</sub> (95% CI)* | P value# |
|------------------------|-----------|------------------------------------------------|---------|------------------------------------------------------|----------|
| Patient age            |           |                                                | <0.0001 |                                                      | <0.0001  |
| <50 years              | 220 (11)  | 24.9 (24.5 - 25.2)                             |         | 24.6 (24.2 - 25.1)                                   |          |
| 50-60 years            | 396 (19)  | 23.9 (23.5 - 24.3)                             |         | 24.5 (24.0 - 25.0)                                   |          |
| 60-70 years            | 612 (29)  | 23.8 (23.5 - 24.1)                             |         | 23.6 ( 23.2 - 24.0)                                  |          |
| 70-80 years            | 653 (31)  | 22.0 (21.5 - 22.4)                             |         | 22.5 (21.9 - 23.1)                                   |          |
| ≥80 years              | 228 (11)  | 20.9 (19.6 - 22.2)                             |         | 21.4 (20.4 - 22.4)                                   |          |
| Sex                    |           |                                                | 0.90    |                                                      | 0.0052   |
| male                   | 1427 (68) | 23.0 (22.6 - 23.4)                             |         | 23.6 (23.3 - 23.9)                                   |          |
| female                 | 682 (32)  | 23.0 (22.4 - 23.6)                             |         | 22.7 (22.2 - 23.3)                                   |          |
| Smoker                 |           |                                                | >0.99   |                                                      |          |
| yes                    | 787 (37)  | 23.0 (22.5 - 23.5)                             |         |                                                      |          |
| no                     | 1322 (63) | 23.0 (22.6 - 23.4)                             |         |                                                      |          |
| Diabetes               |           |                                                | 0.091   |                                                      |          |
| yes                    | 697 (33)  | 22.8 (22.6 - 23.1)                             |         |                                                      |          |
| no                     | 1412 (67) | 23.2 (22.6 - 23.8)                             |         |                                                      |          |
| Heart failure          |           |                                                | 0.16    |                                                      |          |
| yes                    | 365 (17)  | 22.8 (22.3 - 23.3)                             |         |                                                      |          |
| no                     | 1744 (83) | 23.1 (22.6 - 23.7)                             |         |                                                      |          |
| ASA physical status    |           |                                                |         |                                                      |          |
| 1                      | 41 (1.9)  | 27.9 (26.1 - 29.7)                             |         | 25.3 (24.3 - 26.3)                                   | <0.0001  |
| 2                      | 530 (25)  | 24.9 (24.6 - 25.1)                             | <0.0001 | 24.0 (23.6 - 24.5)                                   |          |
| 3                      | 1024 (51) | 22.9 (22.7 - 23.1)                             |         | 23.1 (22.7 - 23.5)                                   |          |
| 4                      | 510 (24)  | 21.9 (21.5 - 22.3)                             |         | 22.9 (22.4 - 23.4)                                   |          |
| Duration of Surgery, h |           |                                                | <0.0001 |                                                      | <0.0001  |
| <2.0                   | 581 (29)  | 25.8 (25.1 - 26.4)                             |         | 25.4 (24.9 - 26.0)                                   |          |
| 2.0-2.99               | 412 (20)  | 23.8 (23.3 - 24.3)                             |         | 23.6 (23.2 - 24.0)                                   |          |
| 3.0-3.99               | 551 (26)  | 22.8 (22.7 - 23.0)                             |         | 22.7 (22.3 - 23.1)                                   |          |
| ≥4.0                   | 565 (27)  | 21.8 (21.0 - 22.5)                             |         | 21.6 (20.9 - 22.2)                                   |          |

\*covariates including in the multivariable adjustment were: patient age, sex, American Society of Anesthesiologists (ASA) physical status and duration of surgery

#P values calculated using the quasi-likelihood ratio test.

<sup>∞</sup> If a patient has spent less than 5 days at home and went to rehab, DAH<sub>30-rehab</sub> is set to 0 to avoid negative values.

**Table S6. Median (95% CI) Days at Home up to 30 Days after Surgery, Assuming 5 Days' Admission to a Rehabilitation Facility if it Occurred, According to Postoperative Complications.\***

| Variable (no. [%])                  | No. with complete data | Yes                | No                              | P value <sup>a</sup> |
|-------------------------------------|------------------------|--------------------|---------------------------------|----------------------|
| Myocardial infarction (120 [6.5])   | 1846                   | 19.0 (16.6 - 21.5) | 23.1 (22.6 - 23.7)              | <0.0001              |
| Stroke (13 [0.7])                   | 1846                   | 10.1 (3.7 - 16.5)  | 23.0 (22.8 - 23.2)              | <0.0001              |
| Pulmonary embolism (7 [0.4])        | 1846                   | 17.1 (8.0 - 26.3)  | 23.0 (22.7 - 23.2)              | 0.032                |
| Cardiac arrest (3 [0.2])            | 1846                   | 15.1 (0.7 - 29.4)  | 23.0 (22.8 - 23.2)              | 0.0065               |
| Surgical site infection (129 [7.0]) | 1846                   | 20.7 (18.9 - 22.6) | 23.1 (22.6 - 23.6)              | <0.0001              |
| Any of the above (263 [14.2])       | 1846                   | 19.1 (17.5 - 20.8) | 23.7 (23.3 - 24.1)              | <0.0001              |
| Hospital readmission (150 [7.1])    | 2090                   | 17.2 (15.4 - 19.0) | 23.7 (23.3 - 24.1) <sup>b</sup> | <0.0001              |

<sup>a</sup> P values calculated using the quasi-likelihood ratio test.

<sup>b</sup> days calculated for those without readmission after excluding postoperative deaths.

\* If a patient has spent less than 5 days at home and went to rehab, DAH<sub>30-rehab</sub> is set to 0 to avoid negative values.

**Table S7. Days at Home up to 30 Days after Surgery (DAH<sub>30-rehab</sub>), Assuming 14 Days' Admission to a Rehabilitation Facility if it Occurred, According to Types of Surgery.\***

| Surgery                                | No. admitted to a rehabilitation hospital (%) | Median (95% CI) DAH <sub>30-rehab</sub> |
|----------------------------------------|-----------------------------------------------|-----------------------------------------|
| Cardiac (n=679)                        | 54 (8.0)                                      | 22.8 (22.6-22.9)                        |
| Orthopedic (n=289)                     | 122 (42)                                      | 20.9 (17.5-24.4)                        |
| Neurosurgery (n=220)                   | 9 (4.0)                                       | 22.8 (22.2-23.5)                        |
| Colorectal (n=118)                     | 8 (6.8)                                       | 24.9 (23.9-26.0)                        |
| Urology (n=315)                        | 26 (8.3)                                      | 23.8 (23.0-24.5)                        |
| Vascular (n=56)                        | 1 (1.8)                                       | 26.0 (24.4-27.6)                        |
| Ear, nose, throat (n=99)               | 17 (17)                                       | 25.8 (24.3-27.3)                        |
| Oesophagogastric/hepatobiliary (n=253) | 4 (1.6)                                       | 24.9 (23.8-26.1)                        |
| Thoracic (n=28)                        | 2 (7.1)                                       | 22.8 (17.8-27.8)                        |
| Other (n=52)                           | 2 (3.8)                                       | 28.8 (27.7-30.0)                        |

\*If a patient has spent less than 5 days at home and went to rehab, DAH<sub>30-rehab</sub> is set to 0 to avoid negative values.



**Table S8. Days at Home up to 30 Days after Surgery (DAH<sub>30</sub>), Assuming 14 Days' Admission to a Rehabilitation Facility if it Occurred, According to Patient and Perioperative Characteristics.#**

| Variable               | no. (%)   | Raw median<br>DAH <sub>30-rehab</sub> (95% CI) | P value | Adjusted median<br>DAH <sub>30-rehab</sub> (95% CI)* | P value |
|------------------------|-----------|------------------------------------------------|---------|------------------------------------------------------|---------|
| Patient age            |           |                                                | <0.0001 |                                                      | <0.0001 |
| <50 years              | 220 (11)  | 24.9 (24.4 - 25.3)                             |         | 24.6 (24.2 - 25.1)                                   |         |
| 50-60 years            | 396 (19)  | 23.9 (23.6 - 24.3)                             |         | 24.5 (24.0 - 25.0)                                   |         |
| 60-70 years            | 612 (29)  | 23.8 (23.5 - 24.1)                             |         | 23.6 (23.3 - 24.0)                                   |         |
| 70-80 years            | 653 (31)  | 22.0 (21.5 - 22.4)                             |         | 22.5 (21.9 - 23.1)                                   |         |
| ≥80 years              | 228 (11)  | 20.9 (19.6 - 22.2)                             |         | 21.5 (20.5 , 22.4)                                   |         |
| Sex                    |           |                                                | 0.84    |                                                      | 0.0065  |
| male                   | 1427 (68) | 23.0 (22.6 - 23.4)                             |         | 23.6 (23.3 - 23.9)                                   |         |
| female                 | 682 (32)  | 23.0 (22.3 - 23.6)                             |         | 22.7 (22.2 - 23.3)                                   |         |
| Smoker                 |           |                                                | 0.92    |                                                      |         |
| yes                    | 787 (37)  | 23.0 (22.5 - 23.5)                             |         |                                                      |         |
| no                     | 1322 (63) | 23.0 (22.5 - 23.4)                             |         |                                                      |         |
| Diabetes               |           |                                                | 0.12    |                                                      |         |
| yes                    | 697 (33)  | 22.8 (22.6 - 23.1)                             |         |                                                      |         |
| no                     | 1412 (67) | 23.2 (22.5 - 23.8)                             |         |                                                      |         |
| Heart failure          |           |                                                | 0.19    |                                                      |         |
| yes                    | 365 (17)  | 22.8 (22.3 - 23.3)                             |         |                                                      |         |
| no                     | 1744 (83) | 23.1 (22.6 - 23.7)                             |         |                                                      |         |
| ASA physical status    |           |                                                | <0.0001 |                                                      | <0.0001 |
| 1                      | 41 (1.9)  | 27.9 (26.0 - 29.8)                             |         | 25.3 (24.2 - 26.3)                                   |         |
| 2                      | 530 (25)  | 24.9 (24.6 - 25.1)                             |         | 24.1 (23.6 - 24.6)                                   |         |
| 3                      | 1024 (51) | 22.9 (22.7 - 23.1)                             |         | 23.1 (22.7 - 23.5)                                   |         |
| 4                      | 510 (24)  | 21.9 (21.5 - 22.4)                             |         | 22.9 (22.4 - 23.4)                                   |         |
| Duration of Surgery, h |           |                                                | <0.0001 |                                                      | <0.0001 |
| <2.0                   | 581 (29)  | 25.8 (25.1 - 26.4)                             |         | 25.4 (24.9 - 26.0)                                   |         |
| 2.0-2.99               | 412 (20)  | 23.8 (23.3 - 24.4)                             |         | 23.6 (23.2 - 24.1)                                   |         |
| 3.0-3.99               | 551 (26)  | 22.8 (22.7 - 23.0)                             |         | 22.7 (22.3 - 23.1)                                   |         |
| ≥4.0                   | 565 (27)  | 21.8 (21.0 - 22.5)                             |         | 21.6 (20.9 - 22.2)                                   |         |

\*covariates including in the multivariable adjustment were: patient age, sex, American Society of Anesthesiologists (ASA) physical status and duration of surgery.

#If a patient has spent less than 5 days at home and went to rehab, DAH<sub>30-rehab</sub> is set to 0 to avoid negative values.

**Table S9. Median (95% CI) Days at Home up to 30 Days after Surgery, Assuming 14 Days' Admission to a Rehabilitation Facility if it Occurred, According to Postoperative Complications.**

| Variable (no. [%])                   | No. with complete data | Yes                  | No                                | P value <sup>a</sup> |
|--------------------------------------|------------------------|----------------------|-----------------------------------|----------------------|
| Myocardial infarction (120 [6.5])    | 1846                   | 19.0 ( 16.5 , 21.6 ) | 23.1 ( 22.6 , 23.7 )              | <0.0001              |
| Stroke (13 [ 0.7])                   | 1846                   | 10.1 ( 3.4 , 16.9 )  | 23.0 ( 22.8 , 23.2 )              | <0.0001              |
| Pulmonary embolism (7 [ 0.4])        | 1846                   | 17.1 ( 8.3 , 26.0 )  | 23.0 ( 22.7 , 23.2 )              | 0.032                |
| Cardiac arrest (3 [0.2])             | 1846                   | 15.1 ( 0.4 , 29.8 )  | 23.0 ( 22.8 , 23.2 )              | 0.0065               |
| Surgical site infection (129 [ 7.0]) | 1846                   | 20.7 ( 19.0 , 22.5 ) | 23.1 ( 22.6 , 23.6 )              | <0.0001              |
| Any of the above (263 [ 14.2])       | 1846                   | 19.1 ( 17.5 , 20.8 ) | 23.7 ( 23.3 , 24.1 )              | <0.0001              |
| Hospital readmission (150 [ 7.1])    | 2090                   | 17.2 ( 15.4 , 18.9 ) | 23.7 ( 23.3 , 24.1 ) <sup>b</sup> | <0.0001              |

<sup>a</sup> P values calculated using the quasi-likelihood ratio test.

<sup>b</sup> Days calculated for those without readmission after excluding postoperative deaths. If a patient has spent less than 5 days at home and went to rehab, DAH<sub>30-rehab</sub> is set to 0 to avoid negative values.

STROBE 2007 (v4) Statement—Checklist of items that should be included in reports of cohort studies

| Section/Topic             | Item # | Recommendation                                                                                                                                                                       | Reported on page # |
|---------------------------|--------|--------------------------------------------------------------------------------------------------------------------------------------------------------------------------------------|--------------------|
| Title and abstract        | 1      | (a) Indicate the study’s design with a commonly used term in the title or the abstract                                                                                               | 1                  |
|                           |        | (b) Provide in the abstract an informative and balanced summary of what was done and what was found                                                                                  | 2                  |
| <b>Introduction</b>       |        |                                                                                                                                                                                      |                    |
| Background/rationale      | 2      | Explain the scientific background and rationale for the investigation being reported                                                                                                 | 4,5                |
| Objectives                | 3      | State specific objectives, including any prespecified hypotheses                                                                                                                     | 5                  |
| <b>Methods</b>            |        |                                                                                                                                                                                      |                    |
| Study design              | 4      | Present key elements of study design early in the paper                                                                                                                              | 6                  |
| Setting                   | 5      | Describe the setting, locations, and relevant dates, including periods of recruitment, exposure, follow-up, and data collection                                                      | 6                  |
| Participants              | 6      | (a) Give the eligibility criteria, and the sources and methods of selection of participants. Describe methods of follow-up                                                           | 6                  |
|                           |        | (b) For matched studies, give matching criteria and number of exposed and unexposed                                                                                                  | n/a                |
| Variables                 | 7      | Clearly define all outcomes, exposures, predictors, potential confounders, and effect modifiers. Give diagnostic criteria, if applicable                                             | 7,8                |
| Data sources/ measurement | 8*     | For each variable of interest, give sources of data and details of methods of assessment (measurement). Describe comparability of assessment methods if there is more than one group | 7                  |
| Bias                      | 9      | Describe any efforts to address potential sources of bias                                                                                                                            | 8                  |
| Study size                | 10     | Explain how the study size was arrived at                                                                                                                                            | 6                  |
| Quantitative variables    | 11     | Explain how quantitative variables were handled in the analyses. If applicable, describe which groupings were chosen and why                                                         | 8,9                |
| Statistical methods       | 12     | (a) Describe all statistical methods, including those used to control for confounding                                                                                                | 9                  |
|                           |        | (b) Describe any methods used to examine subgroups and interactions                                                                                                                  | 9                  |
|                           |        | (c) Explain how missing data were addressed                                                                                                                                          | 9                  |
|                           |        | (d) If applicable, explain how loss to follow-up was addressed                                                                                                                       | n/a                |
|                           |        | (e) Describe any sensitivity analyses                                                                                                                                                | 10                 |
| <b>Results</b>            |        |                                                                                                                                                                                      |                    |

|                          |     |                                                                                                                                                                                                              |            |
|--------------------------|-----|--------------------------------------------------------------------------------------------------------------------------------------------------------------------------------------------------------------|------------|
| Participants             | 13* | (a) Report numbers of individuals at each stage of study—eg numbers potentially eligible, examined for eligibility, confirmed eligible, included in the study, completing follow-up, and analysed            | 10         |
|                          |     | (b) Give reasons for non-participation at each stage                                                                                                                                                         | 9          |
|                          |     | (c) Consider use of a flow diagram                                                                                                                                                                           | Not used   |
| Descriptive data         | 14* | (a) Give characteristics of study participants (eg demographic, clinical, social) and information on exposures and potential confounders                                                                     | 9, Table 2 |
|                          |     | (b) Indicate number of participants with missing data for each variable of interest                                                                                                                          | n/a        |
|                          |     | (c) Summarise follow-up time (eg, average and total amount)                                                                                                                                                  | 9          |
| Outcome data             | 15* | Report numbers of outcome events or summary measures over time                                                                                                                                               | 10,22      |
| Main results             | 16  | (a) Give unadjusted estimates and, if applicable, confounder-adjusted estimates and their precision (eg, 95% confidence interval). Make clear which confounders were adjusted for and why they were included | 10         |
|                          |     | (b) Report category boundaries when continuous variables were categorized                                                                                                                                    | n/a        |
|                          |     | (c) If relevant, consider translating estimates of relative risk into absolute risk for a meaningful time period                                                                                             | n/a        |
| Other analyses           | 17  | Report other analyses done—eg analyses of subgroups and interactions, and sensitivity analyses                                                                                                               | 10,11      |
| <b>Discussion</b>        |     |                                                                                                                                                                                                              |            |
| Key results              | 18  | Summarise key results with reference to study objectives                                                                                                                                                     | 12         |
| <b>Limitations</b>       |     |                                                                                                                                                                                                              |            |
| Interpretation           | 20  | Give a cautious overall interpretation of results considering objectives, limitations, multiplicity of analyses, results from similar studies, and other relevant evidence                                   | 13         |
| Generalisability         | 21  | Discuss the generalisability (external validity) of the study results                                                                                                                                        | 12,15      |
| <b>Other information</b> |     |                                                                                                                                                                                                              |            |
| Funding                  | 22  | Give the source of funding and the role of the funders for the present study and, if applicable, for the original study on which the present article is based                                                | 1          |

\*Give information separately for cases and controls in case-control studies and, if applicable, for exposed and unexposed groups in cohort and cross-sectional studies.

**Note:** An Explanation and Elaboration article discusses each checklist item and gives methodological background and published examples of transparent reporting. The STROBE checklist is best used in conjunction with this article (freely available on the Web sites of PLoS Medicine at <http://www.plosmedicine.org/>, Annals of Internal Medicine at <http://www.annals.org/>, and Epidemiology at <http://www.epidem.com/>). Information on the STROBE Initiative is available at [www.strobe-statement.org](http://www.strobe-statement.org).
